# Supplementary material for: Synthesis of syn- and enantioenriched anti-β-amino alcohols by highly diastereoselective borono-Mannich allylation reactions
Source: Royal Society of Chemistry journal article supplement (doi:10.1039/d1cc06775c), 2022-01-01
Supplement: d1cc06775c1.pdf [file d1cc06775c1.pdf]

# Synthesis of *syn*- and enantioenriched *anti*- $\beta$ -amino alcohols by highly diastereoselective borono-Mannich allylation reactions

Philip J. Chevis,<sup>a</sup> Thanika Promchai,<sup>a,b</sup> Christopher Richardson,<sup>a</sup> Thunwadee Limtharakul,<sup>b</sup> Stephen G. Pyne<sup>a\*</sup>

a. School of Chemistry and Molecular Bioscience, University of Wollongong, Wollongong, New South Wales, 2522, Australia

b. Department of Chemistry, Faculty of Science and Research Center on Chemistry for Development of Health Promoting Products from Northern Resources, Chiang Mai University, Chiang Mai, 50200, Thailand

## Supplementary Information

### Contents

|                                                    |    |
|----------------------------------------------------|----|
| General .....                                      | 1  |
| Experimental procedures and data .....             | 2  |
| NMR spectra and Chiral HPLC traces .....           | 46 |
| X-ray crystal structure report for <b>7c</b> ..... | 92 |
| References .....                                   | 99 |

### General

Anhydrous solvents were obtained from a John Morris solvent purifier system or commercially from Alfa Aesar or Sigma Aldrich. Tetrahydrofuran was purified by distillation over sodium and benzophenone.<sup>1</sup> All flash column chromatography was performed using Chem Supply silica gel 60 230-400 mesh. Plates for TLC were aluminium backed silica gel 60 F254 obtained from Merck or Chem-Supply. Components were visualised under a UV lamp (245 nm), and by staining with cerium ammonium molybdate stain and development with a 2000-Watt heat gun. This staining solution was prepared by dissolving 48 g of ammonium molybdate and 2 g of cerium(IV) sulfate in 940 mL of distilled water, then adding 60 mL of conc. sulfuric acid. Melting point data was acquired using a Gallenkamp MF-370 capillary tube melting point apparatus and are uncorrected. FTIR data was acquired on a Bruker Vertex 70 FTIR spectrometer using neat samples. Optical rotation data was acquired using a Jasco P-2000 polarimeter equipped with a 1 dm sample cell of volume 2 mL. An average of ten measurements were used to calculate specific rotation. NMR spectroscopy was performed on a Bruker Avance 400 MHz spectrometer, where <sup>1</sup>H NMR spectra were acquired at 400 MHz

and  $^{13}\text{C}$  NMR spectra acquired at 100 MHz.  $^1\text{H}$  and  $^{13}\text{C}$  NMR chemical shifts acquired in deuteriochloroform ( $\text{CDCl}_3$ ) are reported in ppm downfield from tetramethylsilane (TMS) at 0.0 ppm.  $^1\text{H}$  and  $^{13}\text{C}$  NMR assignments were made from analysis of COSY, NOESY, HSQC, HMBC and H2BC 2D correlation spectra. For PMB and PMP derivatives, the assignments *o*-C, *m*-C and *p*-C refer to carbon atoms *ortho*-, *meta*-, and *para*-, with the OMe group at the *para*-position. Diastereomeric ratios (dr) were determined from  $^1\text{H}$  NMR analysis of the purified compounds. High resolution mass spectrometry data was acquired using a Micromass Waters Q-ToF Ultima (quadrupole time-of-flight) mass spectrometer, using MeOH as the solvent. Ionisation method was by electrospray ionisation (ESI). Chiral High Performance Liquid Chromatography was performed on a Shimadzu 30 Series UHPLC. 2-Propanol and hexanes were used as the eluents and were either Honeywell or Reidel-de Haen brand and were filtered through a  $0.45\ \mu\text{m}$  Teflon or nylon membrane and ultrasonicated prior to use. Solvent ratio, flow rate, chiral HPLC column, column oven temperature and PDA wavelength are noted for each compound. Retention times and peak integrations were an average of three measurements. Peaks were assigned by comparison to the retention factors of a racemic or scalemic compound, comparison to the retention factor of an enantiomer, or inspection of the absorption spectrum of the compound to distinguish the compound from impurities.

## Experimental procedures and data

### 3-Phenylpropane-1,2-diol (**3**)

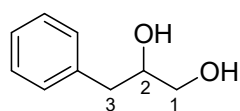

To a solution of allylbenzene (0.5909 g, 5.0 mmol) in 3:1 acetone/water (24 mL) was added *N*-methylmorpholine-*N*-oxide (1.1715 g, 10.0 mmol, 2 equiv.) and potassium osmate dihydrate (18.4 mg, 0.05 mmol, 0.01 equiv.) and the solution was stirred vigorously at room temperature for 23 h. Sat. aqueous  $\text{Na}_2\text{SO}_3$  solution (10 mL) was added to the mixture and extracted with EtOAc (3 x 40 mL). The combined organic layer was washed with brine, dried ( $\text{MgSO}_4$ ), filtered and concentrated *in vacuo*. The crude product was purified by column chromatography over silica gel eluting with 80:20 EtOAc/hexane to afford the title compound **3** as a colorless oil (0.6936 g, 91%). The spectroscopic data of this compound matched with those in the literature.<sup>2</sup>

$R_f = 0.3$  (EtOAc:hexane = 80:20).

**IR (neat):**  $\nu_{\text{max}}$  3345, 3028, 2928, 2876, 1604, 1496, 1454, 1089, 1069, 1030, 745, 700  $\text{cm}^{-1}$ .

**<sup>1</sup>H NMR (400 MHz, CDCl<sub>3</sub>):** δ 7.29 – 7.25 (m, 2H, ArH), 7.21 – 7.16 (m, 3H, ArH), 3.85 – 3.84 (d, *J* = 5 Hz, 1H, H-2), 3.57 – 3.55 (d, *J* = 10 Hz, 1H, H-1A), 3.42 – 3.37 (br t, *J* = 7.5 Hz, 1H, H-1B), 3.33 (br s, 1H, OH), 2.69 – 2.68 (m, 2H, H-3).

**<sup>13</sup>C NMR (100 MHz, CDCl<sub>3</sub>):** δ 130.0 (*ipso*-C), 129.4 (2 x ArCH), 128.6 (2 x ArCH), 126.5 (ArCH), 73.2 (C-2), 65.9 (C-1), 39.7 (C-3).

### 3,6-Diphenyl-1,4-dioxane-2,5-diol or (*rac*)-2-hydroxy-3-phenylpropanal dimer (4)

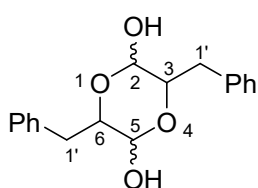

A mixture of 3-phenylpropane-1,2-diol (**4**) (0.1174 g, 0.77 mmol), TEMPO (2.4 mg, 0.01 mmol, 0.02 equiv.), potassium bromide (0.1010 g, 0.85 mmol, 1.1 equiv.), anhydrous CH<sub>2</sub>Cl<sub>2</sub> (7 mL) and sat. aqueous NaHCO<sub>3</sub> solution (2.8 mL) was cooled to 0 °C and added slowly dropwise commercial 0.56 M sodium hypochlorite solution (2 mL, 1.1 mmol, 1.4 equiv.) and stirred at 0 °C for 1 h. The reaction mixture was quenched by addition of sat. aqueous Na<sub>2</sub>S<sub>2</sub>O<sub>3</sub> (7 mL) at 0 °C and extracted with EtOAc (3 x 20 mL). The combined organic layer was dried (MgSO<sub>4</sub>) and concentrated *in vacuo*. The crude product was purified by column chromatography over silica gel eluting with 4:96 MeOH/CH<sub>2</sub>Cl<sub>2</sub> to afford the title compound **4** as a colorless oil (0.6580 g, 68%) and as a diastereomeric mixture.

**R<sub>f</sub>** = 0.4 (MeOH:CH<sub>2</sub>Cl<sub>2</sub> = 4:96).

**IR (neat):** ν<sub>max</sub> 3326, 3271, 2918, 2908, 2850, 1603, 1496, 1137, 1073, 1028, 695 cm<sup>-1</sup>.

The <sup>1</sup>H and <sup>13</sup>C NMR spectroscopic data could not be determined.

**ESI-MS** *m/z* 323 (100%) [M + Na]<sup>+</sup>.

**HR-ESI-MS** *m/z* calculated for C<sub>20</sub>H<sub>24</sub>O<sub>4</sub>Na [M + Na]<sup>+</sup>: 351.1572, found: 351.1571.

### 3,6-Diphenethyl-1,4-dioxane-2,5-diol or (*rac*)-2-hydroxy-3-phenylbutanal dimer (4)

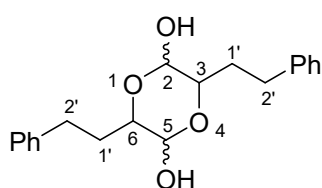

The title compound was prepared according to the literature method.<sup>3</sup>

**General procedure 1 for Petasis-Borono-Mannich (PBM) reactions with (*rac*)-2-hydroxy-3-phenylpropanal dimer**

**(2*S*,3*S*)-3-(Benzylamino)-1-phenylhex-5-en-2-ol (*rac*-5a)**

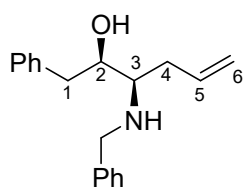

To a solution of (*rac*)-2-hydroxy-3-phenylpropanal dimer (**4**) (50.0 mg, 0.17 mmol) in methanol (0.6640 mL) was added benzylamine (42.9 mg, 44  $\mu$ L 0.4 mmol, 1.18 equiv.) and the mixture was stirred at room temperature for 1 h followed by the addition of allylboronic acid pinacol ester (67.3 mg, 75  $\mu$ L, 0.4 mmol, 1.18 equiv.) and the mixture was stirred at room temperature. After the reaction had completed (20 h), the mixture was then evaporated. The crude product was dissolved in  $\text{CH}_2\text{Cl}_2$  (2 mL) and then washed with sat. aqueous  $\text{NaHCO}_3$  solution (2 x 2 mL). The combined organic layer was dried ( $\text{MgSO}_4$ ), filtered and concentrated *in vacuo*. The crude product was purified by column chromatography over silica gel eluting with 30:70 EtOAc/hexane to afford the title compound *rac*-**5a** as a yellow oil (63.7 mg, 67%).

$R_f = 0.3$  (EtOAc:hexane = 30:70).

dr 95:5.

**IR (neat):**  $\nu_{\text{max}}$  3576, 3391, 3027, 2919, 2850, 1638, 1603, 1495, 1453, 912, 741, 697  $\text{cm}^{-1}$ .

**$^1\text{H}$  NMR (400 MHz,  $\text{CDCl}_3$ ):**  $\delta$  7.35 – 7.19 (m, 10H, ArH), 5.82 – 5.72 (m, 1H, H-5), 5.14 – 5.10 (m, 2H, H-6), 3.88 (d,  $J = 12.7$  Hz, 1H,  $\text{PhCH}_A\text{H}_B\text{N}$ ), 3.73 (d,  $J = 12.7$  Hz, 1H,  $\text{PhCH}_A\text{H}_B\text{N}$ ), 3.68 – 3.63 (m, 1H, H-2), 2.92 (dd,  $J = 13.8, 4.1$  Hz, 1H, H-1<sub>A</sub>), 2.71 (dd,  $J = 13.8, 8.2$  Hz, 1H, H-1<sub>B</sub>), 2.61 (appt. q,  $J = 6.4$  Hz, 1H, H-3), 2.46 – 2.37 (m, 1H, H-4<sub>A</sub>), 2.30 – 2.23 (m, 1H, H-4<sub>B</sub>).

**$^{13}\text{C}$  NMR (100 MHz,  $\text{CDCl}_3$ ):**  $\delta$  140.2 (ArC), 139.1 (ArC), 134.6 (C-5), 129.5 (2 x ArCH), 128.6 (2 x ArCH), 128.5 (2 x ArCH), 128.4 (2 x ArCH), 127.3 (ArCH), 126.4 (ArCH), 118.4 (C-6), 73.0 (C-2), 60.3 (C-3), 52.1 ( $\text{PhCH}_2\text{N}$ ), 40.8 (C-1), 35.4 (C-4).

**ESI-MS**  $m/z$  282  $[\text{M}+\text{H}]^+$

**HR-ESI-MS**  $m/z$  calculated for  $\text{C}_{19}\text{H}_{24}\text{NO}$   $[\text{M}+\text{H}]^+$ : 282.1858, found: 282.1860.

### Synthesis of (2*S*,3*S*)-3-(Benzylamino)-1-phenylhex-5-en-2-ol (*rac*-5a) in EtOH

The above reaction was repeated in EtOH using 0.18 mmol of **4**. The crude product was purified by column chromatography over silica gel eluting with 30:70 EtOAc/hexane to afford the title compound *rac*-**5a** as a yellow oil (33.7 mg, 33%).

### Synthesis of (2*S*,3*S*)-3-(Benzylamino)-1-phenylhex-5-en-2-ol (*rac*-5a) in DCM

The above reaction was repeated in DCM using 0.06 mmol of **4**. The reaction mixture was stirred for 5 d at rt, after which traces of the desired product (*rac*-**5a**) could be detected by TLC analysis. The crude product was purified by column chromatography over silica gel eluting with 30:70 EtOAc/hexane to afford the title compound *rac*-**5a** as a yellow oil (6.8 mg, 20%).

### (2*S*,3*S*)-3-(4-Methoxybenzylamino)-1-phenylhex-5-en-2-ol (*rac*-5b)

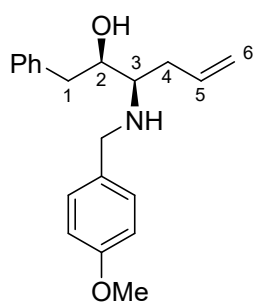

The title compound was prepared by General method 1 using 4-methoxybenzylamine (48.4 mg, 45.8  $\mu$ L 0.35 mmol, 1.18 equiv.) instead of benzylamine. The mixture was stirred at room temperature for 18 h. Purification by column chromatography over silica gel eluting with 30:70 EtOAc/hexane to give *rac*-**5b** as a yellow oil (60.3 mg, 66%).

$R_f = 0.2$  (EtOAc:hexane = 30:70).

**dr** 98:2.

**IR (neat):**  $\nu_{\max}$  3628, 3332, 2917, 2835, 1638, 1511, 1175, 1078, 914, 821, 745, 699  $\text{cm}^{-1}$ .

**$^1\text{H NMR}$  (400 MHz,  $\text{CDCl}_3$ ):**  $\delta$  7.29 – 7.17 (m, 7H, ArH), 6.84 (d,  $J = 8.6$  Hz, 2H, ArH), 5.80 – 5.70 (m, 1H, H-5), 5.13 – 5.08 (m, 2H, H-6), 3.81 (d,  $J = 12.6$  Hz, 1H,  $\text{PhCH}_A\text{H}_B\text{N}$ ), 3.77 (s, 1H,  $\text{OCH}_3$ ), 3.67 – 3.62 (m, 1H, H-2), 3.65 (d,  $J = 15.5$  Hz, 1H,  $\text{PhCH}_A\text{H}_B\text{N}$ ), 2.89 (dd,  $J = 13.8, 4.1$  Hz, 1H, H-1<sub>A</sub>), 2.69 (dd,  $J = 13.8, 8.2$  Hz, 1H, H-1<sub>B</sub>), 2.58 (appt. q,  $J = 6.3$  Hz, 1H, H-3), 2.42 – 2.37 (m, 1H, H-4<sub>A</sub>), 2.28 – 2.21 (m, 1H, H-4<sub>B</sub>).

$^{13}\text{C}$  NMR (100 MHz,  $\text{CDCl}_3$ ):  $\delta$  158.9 (ArC), 139.1 (ArC), 134.5 (C-5), 129.5 (2 x ArCH), 129.4 (2 x ArCH), 128.4 (2 x ArCH), 126.3 (ArCH), 118.3 (C-6), 114.0 (2 x ArCH), 72.9 (C-2), 60.0 (C-3), 55.3 ( $\text{OCH}_3$ ), 51.3 ( $\text{PhCH}_2\text{N}$ ), 40.8 (C-1), 35.3 (C-4).

ESI-MS  $m/z$  312  $[\text{M}+\text{H}]^+$

HR-ESI-MS  $m/z$  calculated for  $\text{C}_{20}\text{H}_{26}\text{NO}_2$   $[\text{M}+\text{H}]^+$ : 312.1964, found: 312.1974.

**(2*S*,3*S*)-3-(Benzhydrylamino)-1-phenylhex-5-en-2-ol (*rac*-5c)**

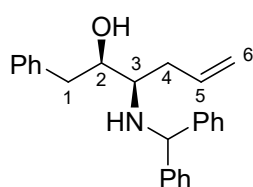

The title compound was prepared by General method 1 using benzhydrylamine (50.1 mg, 31.4  $\mu\text{L}$  0.27 mmol, 1.18 equiv.) instead of benzylamine. The mixture was stirred at room temperature for 16 h.

Purification by column chromatography over silica gel eluting with 100%  $\text{CH}_2\text{Cl}_2$  to give *rac*-5c as a yellow oil (58.7 mg, 72%).

$R_f$  = 0.2 (100%  $\text{CH}_2\text{Cl}_2$ ).

$dr$  >98:2.

IR (neat):  $\nu_{\text{max}}$  3577, 3425, 3288, 3025, 2917, 2850, 1638, 1493, 1452, 743, 696  $\text{cm}^{-1}$ .

$^1\text{H}$  NMR (400 MHz,  $\text{CDCl}_3$ ):  $\delta$  7.42 – 7.13 (m, 15H, ArH), 5.75 – 5.64 (m, 1H, H-5), 5.09 – 5.04 (m, 2H, H-6), 5.00 (br s, 1H,  $(\text{Ph})_2\text{CHN}$ ), 3.71 – 3.67 (m, 1H, H-2), 2.82 (dd,  $J$  = 13.8, 3.9 Hz, 1H, H-1<sub>A</sub>), 2.70 (dd,  $J$  = 13.8, 8.6 Hz, 1H, H-1<sub>B</sub>), 2.60 (q,  $J$  = 5.5 Hz, 1H, H-3), 2.45 – 2.38 (m, 1H, H-4<sub>A</sub>), 2.30 – 2.23 (m, 1H, H-4<sub>B</sub>).

$^{13}\text{C}$  NMR (100 MHz,  $\text{CDCl}_3$ ):  $\delta$  144.4 (ArC), 143.2 (ArC), 139.2 (ArC), 134.5 (C-5), 129.4 (2 x ArCH), 128.7 (2 x ArCH), 128.6 (2 x ArCH), 128.4 (2 x ArCH), 127.8 (2 x ArCH), 127.3 (4 x ArCH), 126.3 (ArCH), 118.4 (C-6), 73.3 (C-2), 64.7 ( $(\text{Ph})_2\text{CHN}$ ), 57.9 (C-3), 40.6 (C-1), 35.0 (C-4).

ESI-MS  $m/z$  358  $[\text{M}+\text{H}]^+$

HR-ESI-MS  $m/z$  calculated for  $\text{C}_{25}\text{H}_{28}\text{NO}$   $[\text{M}+\text{H}]^+$ : 358.2171, found: 358.2173.

**(2*S*,3*S*)-3-(Allylamino)-1-phenylhex-5-en-2-ol (*rac*-5d)**

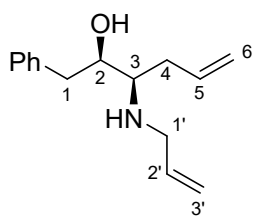

The title compound was prepared by General method 1 using allylamine (19.7 mg, 25.9  $\mu$ L 0.35 mmol, 1.18 equiv.) instead of benzylamine. The mixture was stirred at room temperature for 21 h. Purification by column chromatography over silica gel eluting with 60:40 EtOAc/hexane to give *rac*-**5d** as a yellow oil (20.9 mg, 31%).

$R_f$  = 0.2 (EtOAc:hexane = 60:40).

**dr** >98:2.

**IR (neat):**  $\nu_{\max}$  3333, 3076, 2920, 2852, 1640, 1454, 995, 914, 746, 699  $\text{cm}^{-1}$ .

**$^1\text{H}$  NMR (400 MHz,  $\text{CDCl}_3$ ):**  $\delta$  7.31 – 7.19 (m, 5H, ArH), 5.91 – 5.71 (m, 2H, H-5 and H-2'), 5.19 – 5.06 (m, 4H, H-6 and H-3'), 3.63 – 3.58 (m, 1H, H-2), 3.34 (ddt,  $J$  = 13.9, 6.1, 1.3 Hz, 1H, H-1'<sub>A</sub>), 3.20 (ddt,  $J$  = 13.9, 5.8, 1.4 Hz, 1H, H-1'<sub>B</sub>), 2.90 (dd,  $J$  = 13.8, 4.0 Hz, 1H, H-1<sub>A</sub>), 2.69 (dd,  $J$  = 13.8, 8.3 Hz, 1H, H-1<sub>B</sub>), 2.54 (q,  $J$  = 6.4 Hz, 1H, H-3), 2.41 – 2.35 (m, 1H, H-4<sub>A</sub>), 2.26 – 2.18 (m, 1H, H-4<sub>B</sub>).

**$^{13}\text{C}$  NMR (100 MHz,  $\text{CDCl}_3$ ):**  $\delta$  139.1 (ArC), 136.8 (C-2'), 134.6 (C-5), 129.5 (2 x ArCH), 128.5 (2 x ArCH), 126.3 (ArCH), 118.3 (C-6), 116.1 (C-3'), 72.9 (C-2), 60.1 (C-3), 50.5 (C-1'), 40.8 (C-1), 35.5 (C-4).

**ESI-MS**  $m/z$  232 [M+H]<sup>+</sup>

**HR-ESI-MS**  $m/z$  calculated for  $\text{C}_{15}\text{H}_{22}\text{NO}$  [M+H]<sup>+</sup>: 232.1701, found: 232.1712.

### General Procedure 2 for Petasis-Borono-Mannich (PBM) reactions with (*rac*)-2-hydroxy-3-phenylbutanal dimer

#### (3*S*,4*S*)-4-(Benzylamino)-1-phenylhept-6-en-3-ol (*rac*-**5e**)

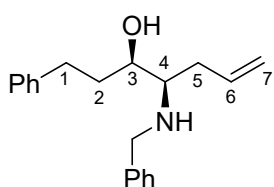

To a solution of (*rac*)-2-hydroxy-3-phenylbutanal dimer (30.0 mg, 0.09 mmol, 1 equiv.) in methanol (0.3640 mL) was added benzylamine (23.5 mg, 24  $\mu$ L 0.22 mmol, 1.18 equiv.) and the mixture was stirred at room temperature for 1 h followed by the addition of allylboronic acid pinacol ester (41.2 mg, 46  $\mu$ L, 0.22 mmol, 1.18 equiv.) and the mixture was stirred at room temperature. After the reaction had completed (20 h), the mixture was then evaporated. The

crude product was dissolved in CH<sub>2</sub>Cl<sub>2</sub> (2 mL) and then washed with sat. aqueous NaHCO<sub>3</sub> solution (2 x 2 mL). The combined organic layer was dried (MgSO<sub>4</sub>), filtered and concentrated *in vacuo*. The crude product was purified by column chromatography over silica gel eluting with 30:70 EtOAc/hexane to afford the title compound *rac-5e* as a yellow oil (45.0 mg, 83%).

**R<sub>f</sub>** = 0.2 (EtOAc:hexane = 30:70).

**dr** 91:9.

**IR (neat):**  $\nu_{\max}$  3404, 3026, 2920, 2851, 1639, 1603, 1453, 913, 741, 697 cm<sup>-1</sup>.

**<sup>1</sup>H NMR (400 MHz, CDCl<sub>3</sub>):**  $\delta$  7.33 – 7.15 (m, 10H, ArH), 5.75 – 5.65 (m, 1H, H-6), 5.11 – 5.06 (m, 2H, H-7), 3.85 (d, *J* = 12.7 Hz, 1H, PhCH<sub>A</sub>H<sub>B</sub>N), 3.69 (d, *J* = 12.7 Hz, 1H, PhCH<sub>A</sub>H<sub>B</sub>N), 3.34 (td, *J* = 8.0, 3.0 Hz, 1H, H-3), 2.92 – 2.84 (m, 1H, H-1<sub>A</sub>), 2.72 – 2.66 (m, 1H, H-1<sub>B</sub>), 2.56 – 2.51 (m, 1H, H-4), 2.40 – 2.34 (m, 1H, H-5<sub>A</sub>), 2.23 – 2.16 (m, 1H, H-5<sub>B</sub>), 1.90 – 1.82 (m, 1H, H-2<sub>A</sub>), 1.75 – 1.65 (m, 1H, H-2<sub>B</sub>).

**<sup>13</sup>C NMR (100 MHz, CDCl<sub>3</sub>):**  $\delta$  142.5 (ArC), 140.1 (ArC), 134.3 (C-6), 128.6 (4 x ArCH), 128.4 (2 x ArCH), 128.3 (2 x ArCH), 127.3 (ArCH), 125.8 (ArCH), 118.4 (C-7), 71.3 (C-3), 61.1 (C-4), 52.0 (PhCH<sub>2</sub>N), 36.4 (C-2), 35.1 (C-5), 32.3 (C-1).

**ESI-MS** *m/z* 296 [M+H]<sup>+</sup>

**HR-ESI-MS** *m/z* calculated for C<sub>20</sub>H<sub>26</sub>NO [M+H]<sup>+</sup>: 296.2014, found: 296.2023.

**(3*S*,4*S*)-4-(4-Methoxybenzylamino)-1-phenylhept-6-en-3-ol (*rac-5f*)**

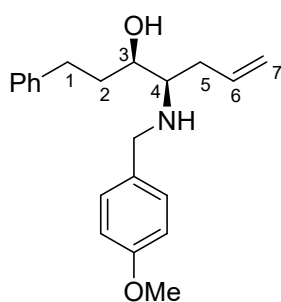

The title compound was prepared by General method 2 using 4-methoxybenzylamine (69.9 mg, 66.4  $\mu$ L 0.50 mmol, 1.18 equiv.) instead of benzylamine. The mixture was stirred at room temperature for 26 h. Purification by column chromatography over silica gel eluting with 2:98 MeOH/CH<sub>2</sub>Cl<sub>2</sub> to give *rac-5f* as a yellow oil (81.4 mg, 60%).

**R<sub>f</sub>** = 0.2 (MeOH:CH<sub>2</sub>Cl<sub>2</sub> = 2:98).

**dr** 90:10.

**IR (neat):**  $\nu_{\max}$  3375, 2928, 1611, 1496, 1454, 1245, 1176, 1033, 916, 821, 748, 699 cm<sup>-1</sup>.



**<sup>1</sup>H NMR (400 MHz, CDCl<sub>3</sub>):** δ 7.28 – 7.14 (m, 7H, ArH), 6.84 (d, *J* = 8.6 Hz, 2H, ArH), 5.74 – 5.64 (m, 1H, H-6), 5.10 – 5.06 (m, 2H, H-7), 3.79 (d, *J* = 12.5 Hz, 1H, PhCH<sub>A</sub>H<sub>B</sub>N), 3.76 (s, 1H, OCH<sub>3</sub>), 3.63 (d, *J* = 12.5 Hz, 1H, PhCH<sub>A</sub>H<sub>B</sub>N), 3.35 (td, *J* = 8.0, 3.0 Hz, 1H, H-3), 2.91 – 2.83 (m, 1H, H-1<sub>A</sub>), 2.70 – 2.63 (m, 1H, H-1<sub>B</sub>), 2.52 (q, *J* = 6.6 Hz, 1H, H-4), 2.39 – 2.32 (m, 1H, H-5<sub>A</sub>), 2.22 – 2.15 (m, 1H, H-5<sub>B</sub>), 1.89 – 1.80 (m, 1H, H-2<sub>A</sub>), 1.73 – 1.64 (m, 1H, H-2<sub>B</sub>).

**<sup>13</sup>C NMR (100 MHz, CDCl<sub>3</sub>):** δ 158.9 (ArC), 142.4 (ArC), 134.2 (C-6), 131.7 (ArC), 129.5 (2 x ArCH), 128.5 (2 x ArCH), 128.4 (2 x ArCH), 125.8 (ArCH), 118.4 (C-7), 113.9 (2 x ArCH), 71.2 (C-3), 60.8 (C-4), 55.3 (OCH<sub>3</sub>), 51.2 (PhCH<sub>2</sub>N), 36.3 (C-2), 34.9 (C-5), 32.6 (C-1).

**ESI-MS** *m/z* 326 [M+H]<sup>+</sup>

**HR-ESI-MS** *m/z* calculated for C<sub>21</sub>H<sub>28</sub>NO<sub>2</sub> [M+H]<sup>+</sup>: 326.2120, found: 326.2130.

### (3*S*,4*S*)-4-(Benzhydrylamino)-1-phenylhept-6-en-3-ol (*rac*-5g)

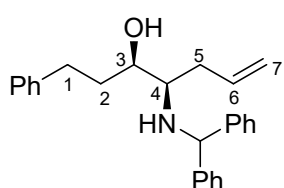

The title compound was prepared by General method 4 using benzhydryl amine (62.1 mg, 58.4 μL 0.34 mmol, 1.18 equiv.) instead of benzylamine. The mixture was stirred at room temperature for 28 h.

Purification by column chromatography over silica gel eluting with 100% CH<sub>2</sub>Cl<sub>2</sub> to give *rac*-5g as a yellow oil (72.0 mg, 69%).

**R<sub>f</sub>** = 0.4 (100% CH<sub>2</sub>Cl<sub>2</sub>).

**dr** 95:5.

**IR (neat):** ν<sub>max</sub> 3430, 3025, 2922, 2856, 1601, 1493, 1451, 1049, 915, 744, 696 cm<sup>-1</sup>.

**<sup>1</sup>H NMR (400 MHz, CDCl<sub>3</sub>):** δ 7.40 – 7.13 (m, 15H, ArH), 5.67 – 5.57 (m, 1H, H-6), 5.06 – 5.02 (m, 2H, H-7), 4.98 (br s, 1H, (Ph)<sub>2</sub>CHN), 3.41 – 3.37 (m, 1H, H-3), 2.83 – 2.76 (m, 1H, H-1<sub>A</sub>), 2.65 – 2.58 (m, 1H, H-1<sub>B</sub>), 2.53 (q, *J* = 5.0 Hz, 1H, H-4), 2.42 – 2.35 (m, 1H, H-5<sub>A</sub>), 2.23 – 2.16 (m, 1H, H-5<sub>B</sub>), 1.87 – 1.79 (m, 1H, H-2<sub>A</sub>), 1.71 – 1.61 (m, 1H, H-2<sub>B</sub>).

**<sup>13</sup>C NMR (100 MHz, CDCl<sub>3</sub>):** δ 144.3 (ArC), 142.9 (ArC), 142.4 (ArC), 134.0 (C-6), 128.7 (4 x ArCH), 128.6 (2 x ArCH), 128.4 (2 x ArCH), 127.7 (2 x ArCH), 127.4 (ArCH), 127.3 (3

x ArCH), 125.8 (ArCH), 118.7 (C-7), 71.6 (C-3), 64.5 ((Ph)<sub>2</sub>CHN), 58.4 (C-4), 35.8 (C-2), 34.4 (C-5), 32.2 (C-1).

ESI-MS  $m/z$  372 [M+H]<sup>+</sup>

HR-ESI-MS  $m/z$  calculated for C<sub>26</sub>H<sub>29</sub>NONa [M+Na]<sup>+</sup>: 394.2147, found: 394.2142.

**(3*S*,4*S*)-4-(Allylamino)-1-phenylhept-6-en-3-ol (*rac*-5*h*)**

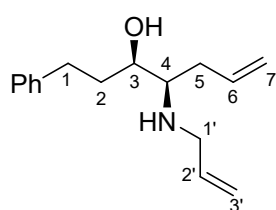

The title compound was prepared by General method 4 using allylamine (15.9 mg, 20.8  $\mu$ L 0.28 mmol, 1.18 equiv.) instead of benzylamine. The mixture was stirred at room temperature for 27 h. Purification by column chromatography over silica gel eluting with 40:60 acetone/hexane to give *rac*-5*h* as a yellow oil (14.9 mg, 26%).

$R_f$  = 0.2 (acetone:hexane = 40:60).

**dr** 81:19.

**IR (neat):**  $\nu_{\max}$  3387, 2923, 2856, 1640, 1496, 1454, 994, 915, 747, 699  $\text{cm}^{-1}$ .

**<sup>1</sup>H NMR (400 MHz, CDCl<sub>3</sub>):**  $\delta$  7.30 – 7.16 (m, 5H, ArH), 5.86 – 5.82 (m, 1H, H-2'), 5.71 – 5.70 (m, 1H, H-6), 5.20 – 5.06 (m, 4H, H-7 and H-3'), 3.39 – 3.32 (m, 2H, H-3 and H-1'<sub>A</sub>), 3.26 – 3.18 (m, 1H, H-3 and H-1'<sub>B</sub>), 2.93 – 2.86 (m, 1H, H-2<sub>A</sub>), 2.73 – 2.65 (m, 1H, H-2<sub>B</sub>), 2.53 – 2.46 (m, 1H, H-4), 2.37 – 2.31 (m, 1H, H-5<sub>A</sub>), 2.21 – 2.14 (m, 1H, H-5<sub>B</sub>), 1.88 – 1.81 (m, 1H, H-1<sub>A</sub>), 1.74 – 1.66 (m, 1H, H-1<sub>B</sub>).

**<sup>13</sup>C NMR (100 MHz, CDCl<sub>3</sub>):**  $\delta$  142.5 (ArC), 136.2 (C-2'), 134.2 (C-6), 128.6 (2 x ArCH), 128.5 (2 x ArCH), 125.9 (ArCH), 118.6 (C-7), 116.7 (C-3'), 71.2 (C-3), 61.0 (C-4), 50.3 (C-1'), 36.5 (C-1), 35.1 (C-5), 32.4 (C-2).

ESI-MS  $m/z$  246 [M+H]<sup>+</sup>

HR-ESI-MS  $m/z$  calculated for C<sub>16</sub>H<sub>24</sub>NO [M+H]<sup>+</sup>: 246.1858, found: 246.1866.

**(4*S*\*,5*S*\*)-4-Allyl-3,5-dibenzylloxazolidin-2-one (*rac*-6)**

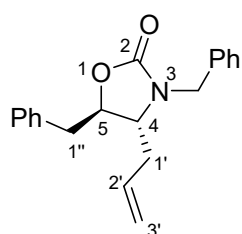

To a solution of 5*a* (11.3 mg, 0.04 mmol) and triethylamine (22.4  $\mu$ L, 0.16 mmol, 4.0 equiv.) in anhydrous CH<sub>2</sub>Cl<sub>2</sub> (1.3 mL) was added triphosgene

(6.3 mg, 0.02 mmol, 0.53 equiv.) at 0 °C under a nitrogen atmosphere. After being stirred for 15 min, the reaction mixture was warm to room temperature and stirred for 17 h, and then concentrated *in vacuo* to give the crude product. Purification by column chromatography over silica gel eluting with 20:80 EtOAc/hexane gave *rac*-**6** as a colorless oil (5.5 mg, 45%).

$R_f = 0.3$  (EtOAc:hexane = 20:80).

**IR (neat):**  $\nu_{\max}$  3477, 2922, 2854, 1744, 1424, 1244, 1001, 750, 729  $\text{cm}^{-1}$ .

**$^1\text{H}$  NMR (400 MHz,  $\text{CDCl}_3$ ):**  $\delta$  7.32 – 7.24 (m, 6H, ArH), 7.10 – 7.06 (m, 4H, ArH), 5.51 – 5.42 (m, 1H, H-2'), 5.12 – 5.04 (m, 2H, H-3'), 4.78 (d,  $J = 15.3$  Hz, 1H,  $\text{PhCH}_A\text{H}_B\text{N}$ ), 4.42 (q,  $J = 6.0$  Hz, 1H, H-5), 4.49 (d,  $J = 15.3$  Hz, 1H,  $\text{PhCH}_A\text{H}_B\text{N}$ ), 3.30 (appt. q,  $J = 5.2$  Hz, 1H, H-4), 2.86 (appt. qd,  $J = 14.0, 5.8$  Hz, 1H, H-1''), 2.21 – 2.17 (m, 2H, H-1').

**$^{13}\text{C}$  NMR (100 MHz,  $\text{CDCl}_3$ ):**  $\delta$  157.7 (C-2), 135.7 (ArC), 135.0 (ArC), 131.4 (C-2'), 129.8 (2 x ArCH), 129.0 (2 x ArCH), 128.8 (2 x ArCH), 128.0 (2 x ArCH), 127.9 (ArCH), 127.2 (ArCH), 120.0 (C-3'), 78.2 (C-5), 77.4 (C-3'), 76.4 (C-5), 57.0 (C-4), 45.9 ( $\text{PhCH}_2\text{N}$ ), 40.4 (C-1''), 36.0 (C-1').

**ESI-MS**  $m/z$  308  $[\text{M}+\text{H}]^+$ .

**HR-ESI-MS:**  $m/z$  calculated for  $\text{C}_{20}\text{H}_{22}\text{NO}_2$   $[\text{M} + \text{H}]^+$ : 308.1651, found: 308.1659.

## Optimisation studies using chiral $\alpha$ -phenylaminoxyaldehydes

- 1) Zhong DMSO method<sup>4</sup>

**Table SI-1:** Summary of PBM optimisation procedures using Zhong's method to produce chiral  $\alpha$ -phenylaminoxyaldehydes.

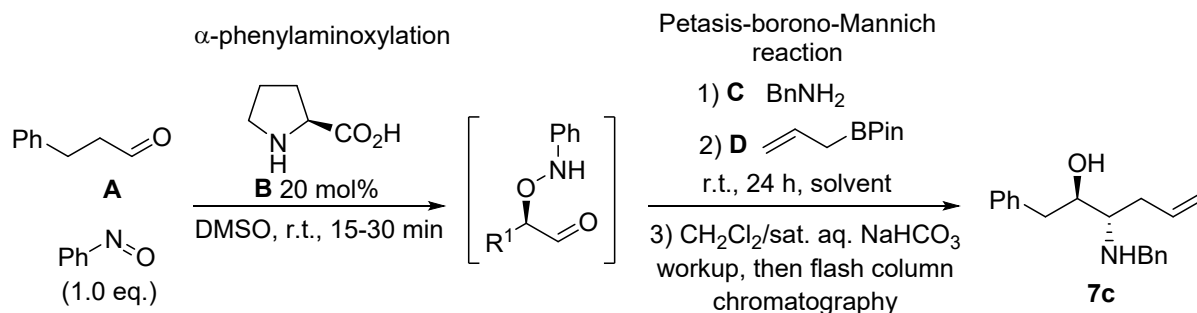

| Entry | Eq. of A | Solvent for PBM reaction    | Eq. of C and D | Yield of 7c | Notes                                                                                     |
|-------|----------|-----------------------------|----------------|-------------|-------------------------------------------------------------------------------------------|
| 1     | 1.2      | DMSO- <i>d</i> <sub>6</sub> | 1.5            | 15          |                                                                                           |
| 2     | 1.2      | 1:1 DMSO/MeOH               | 1.5            | 17          |                                                                                           |
| 3     | 1.2      | DMSO                        | 1.5            | 31          |                                                                                           |
| 4     | 1.2      | DMSO                        | 1.5            | -           | Aminoxylation performed anhydrous, allyl-BF <sub>3</sub> K used. Rxn failed.              |
| 5     | 1.2      | DMSO                        | 2.0            | 31          |                                                                                           |
| 6     | 1.2      | DMSO                        | 2.0            | 37          | N-O bond reduction after treatment with CuSO <sub>4</sub> , workup with NH <sub>3</sub> . |

2) MacMillan CHCl<sub>3</sub> method<sup>5</sup>

**Table SI-2:** Summary of PBM optimisation procedures using Macmillan's method to produce chiral  $\alpha$ -phenylaminoxyaldehydes. It was identified that a large excess of starting aldehyde would hinder the PBM reaction with by-products, so attempts were made to make the reaction work with less equivalents of starting material. In an attempted one-pot PBM reaction, the product **7a** was obtained in a modest yield of 44% with a poor dr of 70:30.

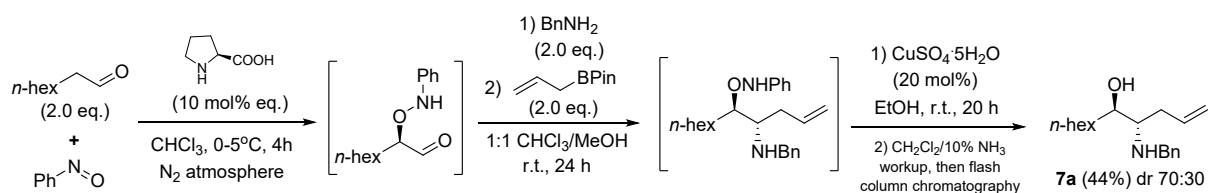

### 3) Hayashi MeCN method<sup>6</sup>

**Table SI-3:** Summary of PBM optimisation procedures using Hayashi's method to produce chiral  $\alpha$ -phenylaminoxyaldehydes. As above, attempts were made to make the reaction work with less equivalents of starting materials. These reactions were unsuccessful.

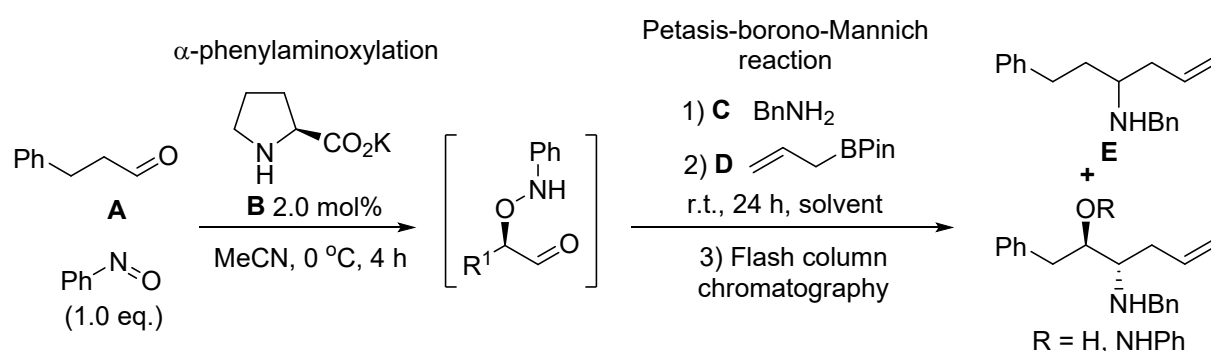

| Entry Book ID | Eq. of A | Solvent for PBM reaction | Eq. of C and D | Yield (%) | Notes                                                                             |
|---------------|----------|--------------------------|----------------|-----------|-----------------------------------------------------------------------------------|
| 1<br>PC_3_34  | 1.5      | MeCN                     | 2.0            | 17        | 17% yield of Mannich adduct E                                                     |
| 2<br>PC_3_38  | 1.5      | -                        | -              | -         | Dry conditions. Attempted isolation of aminoxyaldehyde                            |
| 3<br>PC_3_43  | 1.5      | MeCN                     | 2.0            | 6         | White solid (boronate salt?) produced, 6% yield of Mannich adduct E               |
| 4<br>PC_3_48  | 1.5      | 1:1 MeCN/MeOH            | 2.0            | <1        | <1% yield of Mannich adduct E                                                     |
| 5<br>PC_4_58  | 3.0      | MeCN                     | 3.0            | 39        | Allyl-BF <sub>3</sub> K used. 39% yield of Mannich adduct E, white solid produced |

### General Procedure 3 for the one-pot preparation of *anti*- $\beta$ -aminoalcohols from aldehydes.

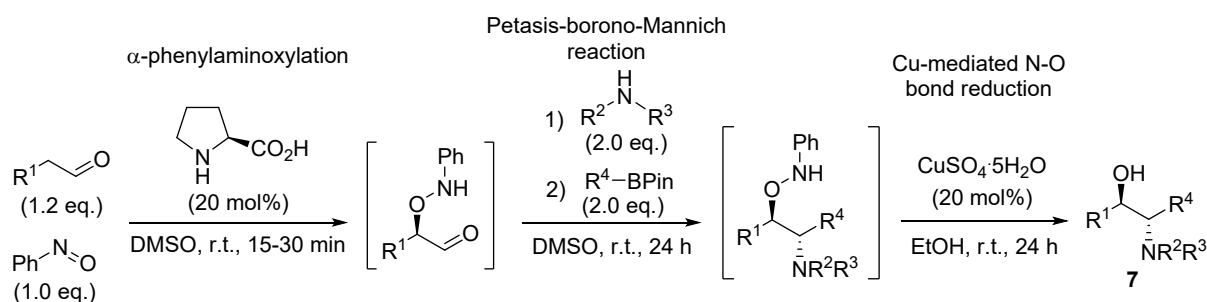

**Part A:  $\alpha$ -aminoxylation of aldehydes:** To a 10 mL round-bottomed flask was added L-proline (6.9 mg, 0.06 mmol, 0.2 eq or 20 mol%) and anhydrous dimethyl sulfoxide (0.5 mL), and with stirring was added the aldehyde component (0.36 mmol, 1.2 eq). This mixture was sealed and stirred at room temperature for 5 min, after which was added nitrosobenzene (32.1 mg, 0.3 mmol, 1.0 eq), turning the reaction mixture green. The reaction mixture was then resealed and stirred at room temperature until completion (approx. 15-20 min), as determined by TLC and the colour change from green to yellow-orange.

**Part B: Borono-Mannich reaction:** Upon completion of Part A, to the reaction mixture was added the amine component (0.60 mmol, 2.0 eq) and the reaction mixture stirred at room temperature for 5 min. Pinacol allylboronate (116.0  $\mu$ L, 0.60 mmol, 2.0 eq) was then added and the reaction mixture was stirred at room temperature with TLC monitoring for 24 h. Upon completion of the reaction, the mixture was added to a separating funnel with sat. NaHCO<sub>3</sub> (5 mL) and extracted with CH<sub>2</sub>Cl<sub>2</sub>. (3 x 3 mL) The combined organic layers were dried over anhydrous K<sub>2</sub>CO<sub>3</sub>, filtered and concentrated *in vacuo* and used for Part C.

**Part C: N-O bond cleavage:** Upon completion of Part B, ethanol (~0.5 mL) and CuSO<sub>4</sub>·5H<sub>2</sub>O (15.0 mg, 0.1 mmol, 0.2 eq or 20 mol%) was added and the reaction mixture was stirred at room temperature for 24 h with TLC monitoring. The reaction mixture was then added to a separating funnel with ~10% aqueous NH<sub>3</sub> solution (~5 mL) and extracted with CH<sub>2</sub>Cl<sub>2</sub> (3 x 5 mL). The combined organic layers were dried over anhydrous K<sub>2</sub>CO<sub>3</sub>, filtered then concentrated *in vacuo* and purified by flash column chromatography over silica gel to obtain the pure  $\beta$ -amino alcohol product 7.

#### (4*S*,5*R*)-4-(Benzylamino)undec-1-en-5-ol (7a)

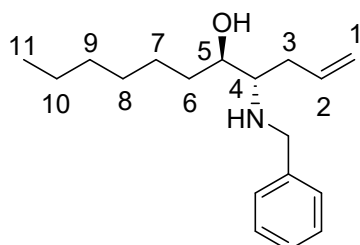

The title compound was prepared according to *General Procedure 3*, using octanal (56.2  $\mu\text{L}$ , 0.36 mmol, 1.2 eq) as the aldehyde component and benzylamine (65.5  $\mu\text{L}$ , 0.60 mmol, 2.0 eq) as the amine component. After extraction with  $\text{CH}_2\text{Cl}_2$  in Part B the combined organic layers were washed once with sat. aq. NaCl (~5 mL) before drying and concentration. Purification by flash column chromatography eluting with a gradient of 15:85 and 1:3 EtOAc/*n*-hexane gave the title product **7a** (45.4 mg, 54%) as a pale-yellow oil.

$R_f = 0.09$  (1:3 EtOAc/*n*-hexane).

**dr** 97:3.

**ee** 92%. Chiralpak IG-3 column and guard, 15% 2-propanol/hexane, flow rate 0.6 mL.min<sup>-1</sup>, column oven 30 °C PDA 207 nm.  $R_t$  (mins) 7.31 (major enantiomer), 8.31 (minor enantiomer).

$[\alpha]_D^{25} +1.6$  (*c* 0.31,  $\text{CHCl}_3$ ).

**IR (neat):**  $\nu_{\text{max}}$  3332 (O-H str.), 3063 ( $\text{sp}^2$  C-H str.), 2925 ( $\text{sp}^3$  C-H str.), 1639 (C=C str.) 1600 (Ar C=C str.), 1496 (N-H bend), 1454 (Ar C=C str.), 1075 (C-O str.), 912 ( $\text{sp}^2$  C-H oop), 697 (Ar C-H oop), 743 (Ar C-H oop)  $\text{cm}^{-1}$ .

**<sup>1</sup>H NMR (400 MHz,  $\text{CDCl}_3$ ):**  $\delta$  7.38 – 7.23 (m, 5H, Ar-*H*), 5.78 – 5.64 (m, 1H, H-2), 5.13 – 5.05 (m, 2H, H-1), 3.84 (d,  $J = 13.0$  Hz, 1H,  $\text{CH}_A\text{H}_B\text{Ph}$ ), 3.78 – 3.71 (m, 1H, H-5), 3.71 (d,  $J = 13.0$  Hz, 1H,  $\text{CH}_A\text{H}_B\text{Ph}$ ), 2.60 (ddd,  $J = 9.8, 3.9, 3.2$  Hz, 1H, H-4), 2.28 (dddd,  $J = 12.6, 5.5, 3.9, 1.9$  Hz, 1H, H-3), 2.15 – 2.03 (m, 1H, H-3), 1.57 – 1.40 (m, 2H, H-6), 1.40 – 1.21 (m, 8H, H-7, H-8, H-9, H-10), 0.89 (t,  $J = 6.8$  Hz, 3H, H-11).

**<sup>13</sup>C NMR (101 MHz,  $\text{CDCl}_3$ ):**  $\delta$  140.2 (*ipso*-C), 135.8 (C-2), 128.5 (*o*-C), 128.1 (*m*-C), 127.1 (*p*-C), 118.1 (C-1), 69.5 (C-5), 59.7 (C-4), 51.5 ( $\text{CH}_2\text{Ph}$ ), 32.7 (C-3), 32.2 (C-6), 31.8 (C-9), 29.5 (C-8), 26.5 (C-7), 22.6 (C-10), 14.1 (C-11).

**HRMS (ESI):**  $m/z$  calculated for  $\text{C}_{18}\text{H}_{30}\text{NO}$   $[\text{M}+\text{H}]^+$ : 276.2327, found 276.2328.

**(4*S*,5*R*)-4-((4-Methoxybenzyl)amino)undec-1-en-5-ol (7b)**

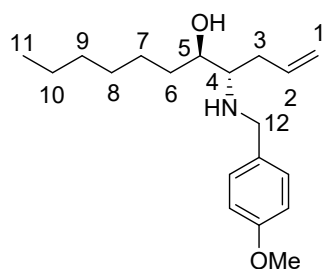

The title compound was prepared according to *General Procedure 3*, using octanal (56.2  $\mu\text{L}$ , 0.36 mmol, 1.2 eq) as the aldehyde component and *para*-methoxybenzylamine (91.5  $\mu\text{L}$ , 0.60 mmol, 2.0 eq) as the amine component. After extraction with  $\text{CH}_2\text{Cl}_2$  in Part B the combined organic layers were washed once with NaCl

brine (~5 mL) before drying and concentration. Purification by flash column chromatography eluting with 3:7 EtOAc/*n*-hexane gave the title product **7b** (35.5 mg, 37%) as a yellow-white crystal. This compound could be further purified by recrystallisation using the solvent diffusion method with CH<sub>2</sub>Cl<sub>2</sub> and *n*-hexane,<sup>7</sup> however these crystals were unsuitable for X-ray crystallography.

**R<sub>f</sub>** = 0.09 (3:7 EtOAc/*n*-hexane).

**dr** 99:1.

**ee** 99%. Chiralpak IG-3 column and guard, 20% 2-propanol/hexane, flow rate 0.6 mL.min<sup>-1</sup>, column oven 30 °C, PDA 207 nm. R<sub>t</sub> (mins) 8.65 (major enantiomer), minor enantiomer not observed (expected at 12.16 mins). (*ee* measured on recrystallised sample).

**Mp.**: 62-66 °C.

[α]<sub>D</sub><sup>25</sup> +18.1 (*c* 0.73, CHCl<sub>3</sub>).

**IR (neat)**: ν<sub>max</sub> 3167 (O-H str.), 3074 (sp<sup>2</sup> C-H str.), 2921 (sp<sup>3</sup> C-H str.), 1641 (C=C str.), 1610 (Ar. C=C str.), 1513 (N-H bend), 1455 (Ar. C=C str.), 1374 (CH<sub>3</sub> bend), 1968 (C-O str.), 1089 (C-O str.), 907 (sp<sup>2</sup> C-H oop), 808 (Ar. C-H oop) cm<sup>-1</sup>.

**<sup>1</sup>H NMR (400 MHz, CDCl<sub>3</sub>)**: δ 7.20 (d, *J* = 8.6 Hz, 2H, *m*-H), 6.86 (d, *J* = 8.6 Hz, 2H, *o*-H), 5.77 – 5.64 (m, 1H, H-2), 5.15 – 5.05 (m, 2H, H-1), 3.80 (s, 3H, OCH<sub>3</sub>), 3.78 (d, *J* = 12.9 Hz, 1H, CH<sub>A</sub>H<sub>B</sub> H-12), 3.73 (dt, *J* = 8.4, 3.5 Hz, 1H, H-5), 3.65 (d, *J* = 12.9 Hz, 1H, CH<sub>A</sub>H<sub>B</sub> H-12), 2.59 (dt, *J* = 9.55, 3.5 Hz, 1H, H-4), 2.27 (appt. dt, *J* = 14.3, 3.8, 1.8 Hz, 1H, H-3), 2.08 (appt. dt, *J* = 14.3, 9.55 Hz, 1H, H-3), 1.57 – 1.42 (m, 2H, H-6), 1.40 – 1.19 (m, 8H), 0.94 – 0.83 (m, 3H, H-11).

**<sup>13</sup>C NMR (101 MHz, CDCl<sub>3</sub>)**: δ 158.8 (*p*-C), 135.8 (C-2), 132.2 (*ipso*-C), 129.3 (*m*-C), 118.1 (C-1), 113.9 (*o*-C), 69.5 (C-5), 59.6 (C-4), 55.3 (OCH<sub>3</sub>), 50.9 (CH<sub>2</sub>Ar), 32.7 (C-3), 32.2 (C-6), 31.8 (C-9), 29.5 (C-8), 26.5 (C-7), 22.6 (C-10), 14.1 (C-11).

**HRMS (ESI)**: *m/z* calculated for C<sub>19</sub>H<sub>32</sub>NO<sub>2</sub> [M+H]<sup>+</sup>: 306.2433, found 306.2441.

### (2*R*,3*S*)-3-(Benzylamino)-1-phenylhex-5-en-2-ol (7c)

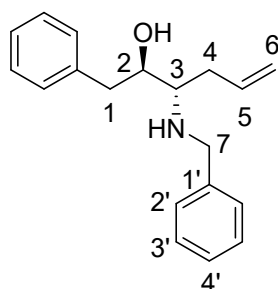

The title compound was prepared according to *General Procedure 3*, using hydrocinnamaldehyde (47.5 μL, 0.36 mmol, 1.2 eq) as the aldehyde component and benzylamine as the amine component (65.5



$\mu\text{L}$ , 0.6 mmol, 2.0 eq). Purification by flash column chromatography eluting with 3:7 EtOAc/*n*-hexane gave the title product **7c** (33.8 mg, 37%) as a brown crystal. This compound produced crystals suitable for X-ray crystallography, grown by the solvent diffusion method using  $\text{CH}_2\text{Cl}_2$  and *n*-hexane.<sup>7</sup>

$R_f = 0.13$  (3:7 EtOAc/*n*-hexane).

**dr** 94:6; 97:3 after recrystallisation.

**ee** 99%. Chiralpak IG-3 column and guard, 15% 2-propanol/hexane, flow rate 0.6 mL.min<sup>-1</sup>, column oven 30 °C PDA 207 nm.  $R_t$  (mins) 9.26 (major enantiomer), minor enantiomer not detected (**ee** measured on recrystallised sample).

**Mp.**: 82-86 °C.

$[\alpha]_D^{25} +1.3$  (*c* 0.61,  $\text{CHCl}_3$ ).

**IR (neat)**:  $\nu_{\text{max}}$  3363 (O-H str.), 3091, 3059, 1659 (C=C str.), 1601 (Ar. C=C str.), 1484 (N-H bend), 1456 (Ar. C=C str.), 1071 (C-O str.) 687 (Ar. C-H oop), 760 (Ar. C-H oop) cm<sup>-1</sup>.

**<sup>1</sup>H NMR (400 MHz,  $\text{CDCl}_3$ )**:  $\delta$  7.36 – 7.21 (m, 10H, Ar-*H*), 5.79 – 5.66 (m, 1H, H-5), 5.17 – 5.08 (m, 2H, H-6), 3.99 (ddd,  $J = 8.5, 4.8, 3.4$  Hz, 1H, H-2), 3.81 (d,  $J = 13.1$  Hz, 1H,  $\text{CH}_A\text{H}_B\text{Ph}$ , H-7), 3.70 (d,  $J = 13.1$  Hz, 1H,  $\text{CH}_A\text{H}_B\text{Ph}$  H-7), 2.81 (dd,  $J = 13.8, 8.5$  Hz, 1H,  $\text{CH}_A\text{H}_B\text{Ph}$ , H-1), 2.73 (dd,  $J = 13.8, 4.8$  Hz, 1H,  $\text{CH}_A\text{H}_B\text{Ph}$  H-1), 2.66 (ddd,  $J = 9.4, 4.0, 3.4$  Hz, 1H, H-3), 2.42 (dddd,  $J = 14.3, 5.7, 4.1, 1.6$  Hz, 1H, H-4), 2.28 – 2.16 (m, 1H, H-4).

**<sup>13</sup>C NMR (101 MHz,  $\text{CDCl}_3$ )**:  $\delta$  140.0 (C-1'), 139.1 (*ipso*-C), 135.5 (C-5), 129.1 (*m*-C), 128.49 (*o*-C), 128.47 (C-2'), 128.1 (C-3'), 127.1 (C-4'), 126.3 (*p*-C), 118.2 (C-6), 71.2 (C-2), 59.4 (C-3), 51.5 (C-7), 38.7 (C-1), 33.0 (C-4).

**HRMS (ESI)**:  $m/z$  calculated for  $\text{C}_{19}\text{H}_{25}\text{NO}$   $[\text{M}+\text{H}]^+$ : 282.1858, found 282.1855.

### (2*R*,3*S*)-3-(Allylamino)-1-phenylhex-5-en-2-ol (**7d**)

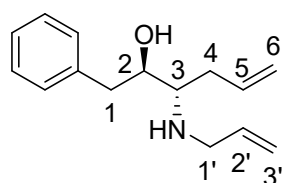

The title compound was prepared according to *General Procedure 3*, using hydrocinnamaldehyde (47.5  $\mu\text{L}$ , 0.36 mmol, 1.2 eq) as the aldehyde component and allylamine (45.0  $\mu\text{L}$ , 0.60 mmol, 2.0 eq) as the amine component. Purification by flash column chromatography eluting with 2:3 EtOAc/*n*-hexane gave the title product **7d** (34.3 mg, 45%) as a dark yellow oil.

$R_f = 0.07$  (2:3 EtOAc/*n*-hexane).

**dr** 92:8.

**ee** could not be measured reliably.

$[\alpha]_D^{25} +6.34$  (*c* 0.38, CHCl<sub>3</sub>).

**IR (neat):**  $\nu_{\max}$  3311 (O-H str.), 3064 (*sp*<sup>2</sup> C-H str.), 2923 (*sp*<sup>3</sup> C-H str.), 1640 (C=C str.), 1602 (Ar C=C str.), 1495 (N-H bend), 1454 (Ar C=C str.), 1030 (C-O str.) 994 (*sp*<sup>2</sup> C-H oop), 914 (*sp*<sup>2</sup> C-H oop), 745 (Ar C-H oop), 698 (Ar C-H oop) cm<sup>-1</sup>.

**<sup>1</sup>H NMR (400 MHz, CDCl<sub>3</sub>):**  $\delta$  7.36 – 7.15 (m, 5H, Ar-*H*), 5.93 – 5.70 (m, 2H, H-5, H-2'), 5.23 – 5.03 (m, 4H, H-6, H-3'), 3.95 (ddd, *J* = 8.4, 4.8, 3.2 Hz, 1H, H-2), 3.27 (appt. ddt, *J* = 14.1, 5.5, 1.5 Hz, 1H, CH<sub>A</sub>H<sub>B</sub> H-1'), 3.19 (appt. ddt, *J* = 14.1, 6.7, 1.3 Hz, 1H, CH<sub>A</sub>H<sub>B</sub> H-1'), 2.80 (dd, *J* = 13.8, 8.6 Hz, 1H, CH<sub>A</sub>H<sub>B</sub> H-1), 2.72 (dd, *J* = 13.8, 4.8 Hz, 1H, CH<sub>A</sub>H<sub>B</sub> H-1), 2.64 (ddd, *J* = 9.1, 4.2, 3.2 Hz, 1H, H-3), 2.46 – 2.37 (m, 1H, H-4), 2.22 (dt, *J* = 14.4, 9.1 Hz, 1H, H-4).

**<sup>13</sup>C NMR (101 MHz, CDCl<sub>3</sub>):**  $\delta$  139.1 (*ipso*-C), 136.2 (C-2'), 135.5 (C-5), 129.1 (*m*-C), 128.5 (*o*-C), 126.3 (*p*-C), 118.3 (C-6), 116.5 (C-3'), 71.2 (C-2), 59.3 (C-3), 49.8 (C-1'), 38.8 (C-1), 33.0 (C-4).

**HRMS (ESI):** *m/z* calculated for C<sub>15</sub>H<sub>22</sub>NO [M+H]<sup>+</sup>: 232.1701, found 232.1710.

### (3*R*,4*S*)-4-(Benzylamino)-2-methylhept-6-en-3-ol (7e)

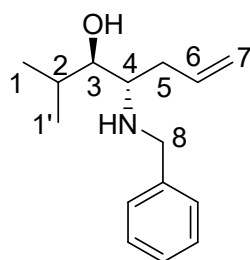

oil.

The title compound was prepared according to *General Procedure 3*, using isovaleraldehyde (39.5  $\mu$ L, 0.36 mmol, 1.2 eq) as the aldehyde component and benzaldehyde (65.5  $\mu$ L, 0.60 mmol, 2.0 eq) as the amine component. Purification by flash column chromatography eluting with 3:7 EtOAc/*n*-hexane gave the title product **7e** (30.1 mg, 42%) as a yellow

$R_f = 0.10$  (3:7 EtOAc/*n*-hexane).

**dr** 90:10.

**ee** 98%. Chiralpak IG-3 column and guard, 15% 2-propanol/hexane, flow rate 0.6 mL.min<sup>-1</sup>, column oven 30 °C, PDA 207 nm.  $R_t$  (mins) 7.46 (major enantiomer), minor enantiomer not detected.

$[\alpha]_D^{25} +58.7$  (*c* 1.17, CHCl<sub>3</sub>).

**IR (neat):**  $\nu_{\max}$  3330 (O-H str.), 3063 (*sp*<sup>2</sup> C-H str.), 2924 (*sp*<sup>3</sup> C-H str.), 1639 (C=C str.), 1600 (Ar C=C str.), 1495 (N-H bend) 1454 (Ar C=C str.), 1364 (CH<sub>3</sub> bend), 1072 (C-O str.), 743 (Ar C-H oop), 697 (Ar C-H oop) cm<sup>-1</sup>.

**<sup>1</sup>H NMR (400 MHz, CDCl<sub>3</sub>):**  $\delta$  7.40 – 7.21 (m, 5H, Ar-*H*), 5.75 – 5.63 (m, 1H, H-6), 5.14 – 5.04 (m, 2H, H-7), 3.85 (d, *J* = 13.0 Hz, 1H, CH<sub>A</sub>H<sub>B</sub> H-8), 3.64 (d, *J* = 13.0 Hz, 1H, CH<sub>A</sub>H<sub>B</sub> H-8), 3.31 (dd, *J* = 9.2, 3.1 Hz, 1H, H-3), 2.74 (dt, *J* = 10.5, 3.1 Hz, 1H, H-4), 2.31 (appt. dddd, *J* = 14.45, 4.9, 3.3, 1.7 Hz, 1H, H-5), 2.03 (dt, *J* = 14.45, 9.9 Hz, 1H, H-5), 1.70 (dp, *J* = 9.2, 6.6 Hz, 1H, H-2), 1.09 (d, *J* = 6.5 Hz, 3H, H-1), 0.84 (d, *J* = 6.7 Hz, 3H, H-1').

**<sup>13</sup>C NMR (101 MHz, CDCl<sub>3</sub>):**  $\delta$  140.0 (*ipso*-C), 135.8 (C-6), 128.5 (*o*-C), 128.2 (*m*-C), 127.1 (*p*-C), 118.3 (C-7), 74.5 (C-3), 57.4 (C-4), 51.3 (C-8), 31.9 (C-5), 29.8 (C-2), 20.6 (C-1), 18.1 (C-1').

**HRMS (ESI):** *m/z* calculated for C<sub>15</sub>H<sub>24</sub>NO [M+H]<sup>+</sup>: 234.1858, found 234.1862.

**(3*R*,4*S*)-4-((4-Methoxybenzyl)amino)-2-methylhept-6-en-3-ol (7f)**

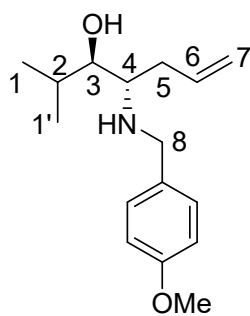

The title compound was prepared according to *General Procedure 5*, using isovaleraldehyde (39.5  $\mu$ L, 0.36 mmol, 1.2 eq) as the aldehyde component and *para*-methoxybenzaldehyde (91.5  $\mu$ L, 0.60 mmol, 2.0 eq) as the amine component. Purification by flash column chromatography eluting with 2:3 EtOAc/*n*-hexane gave the title product **7f** (30.1 mg, 42%) as a yellow oil.

$R_f = 0.17$  (2:3 EtOAc/*n*-hexane).

**dr** 88:12.

ee 98%. Chiralpak IG-3 column and guard, 15% 2-propanol/hexane, flow rate 0.6 mL.min<sup>-1</sup>, column oven 30 °C, PDA 207 nm. R<sub>t</sub> (mins) 9.62 (major enantiomer), 11.15 (minor enantiomer), 14.2 (minor diastereomer).

$[\alpha]_D^{25}$  -12.8 (*c* 0.44, CHCl<sub>3</sub>).

**IR (neat):**  $\nu_{\max}$  3432 (O-H str.), 3074 (*sp*<sup>2</sup> C-H str.), 2928 (*sp*<sup>3</sup> C-H str.), 1639 (C=C str.), 1611 (Ar C=C str.), 1512 (N-H bend), 1441 (Ar C=C str.), 1091 (C-O str.), 1034 (C-O str), 821 (Ar C-H oop) cm<sup>-1</sup>.

**<sup>1</sup>H NMR (400 MHz, CDCl<sub>3</sub>):**  $\delta$  7.19 (d, *J* = 8.6 Hz, 2H, *m*-H), 6.86 (d, *J* = 8.6 Hz, 2H, *o*-H), 5.75 – 5.62 (m, 1H, H-6), 5.13 – 5.04 (m, 2H, H-7), 3.80 (s, 3H, OCH<sub>3</sub>), 3.76 (d, *J* = 12.8 Hz, 1H, CH<sub>A</sub>H<sub>B</sub> H-8), 3.57 (d, *J* = 12.8 Hz, 1H CH<sub>A</sub>H<sub>B</sub> H-8), 3.30 (dd, *J* = 9.2, 3.1 Hz, 1H, H-3), 2.72 (dt, *J* = 10.5, 3.1 Hz, 1H, H-4), 2.30 (ddd, *J* = 14.5, 4.9, 3.3, 1.7 Hz, 1H, H-5), 2.01 (dt, *J* = 14.5, 10.0 Hz, 1H, H-5), 1.69 (dp, *J* = 9.2, 6.6 Hz, 1H, H-2), 1.09 (d, *J* = 6.5 Hz, 3H, H-1), 0.83 (d, *J* = 6.7 Hz, 3H, H-1').

**<sup>13</sup>C NMR (101 MHz, CDCl<sub>3</sub>):**  $\delta$  158.7 (*p*-C), 135.8 (C-6), 132.2 (*ipso*-C), 129.3 (*m*-C), 118.2 (C-7), 113.9 (*o*-C), 74.49 (C-3), 57.3 (C-4), 55.3 (OCH<sub>3</sub>), 50.6 (C-8), 31.9 (C-5), 29.8 (C-2), 20.7 (C-1), 18.0 (C-1').

**HRMS (ESI):** *m/z* calculated for C<sub>16</sub>H<sub>26</sub>NO<sub>2</sub> [M+H]<sup>+</sup>: 264.1964, found 264.1970.

### Investigations in the synthesis of chiral $\alpha$ -benzoyloxyaldehydes<sup>8</sup>

**Table SI-4:** Investigations in the synthesis of chiral  $\alpha$ -benzoyloxyaldehydes. From the literature it was not immediately clear what form the catalyst was used in (i.e. free amine or commercially available hydrochloride salt) nor if this would make a difference. The authors were also interested in if any excess of BPO or aldehyde or strict anhydrous conditions would change the yield. Although entry 6 produced the highest yield, this was with the hydrochloride salt of the catalyst, and therefore the effect on ee was (as yet) unknown. For this reason the reported literature conditions in entry 7 were followed.

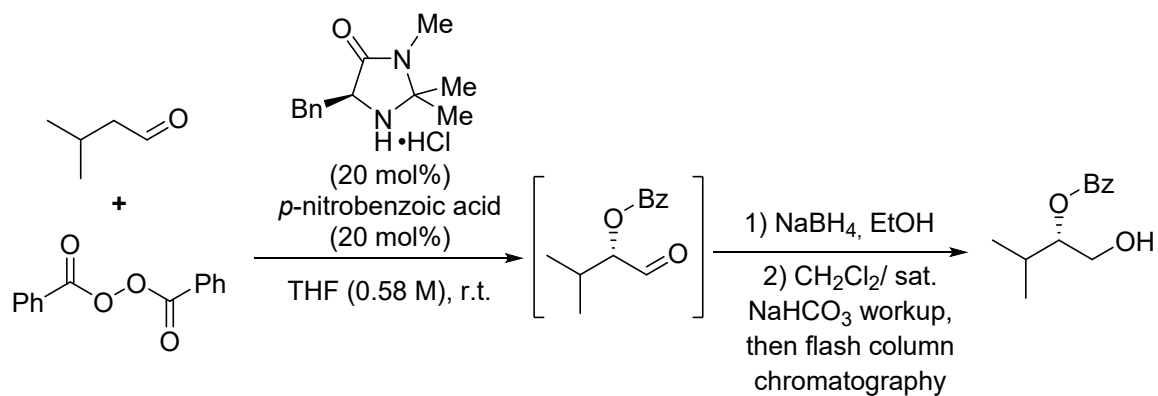

| Entry | Eq. of aldehyde | Eq. of BPO | Additive                      | Time | Yield (%) | Notes                          |
|-------|-----------------|------------|-------------------------------|------|-----------|--------------------------------|
| 1     | 1.0             | 1.0        | -                             | 48 h | 23        |                                |
| 2     | 1.0             | 1.0        | -                             | 24 h | 22        |                                |
| 3     | 1.0             | 1.0        | H <sub>2</sub> O (50 $\mu$ L) | 24 h | 16        |                                |
| 4     | 1.0             | 2.0        | -                             | 24 h | 22        |                                |
| 5     | 1.0             | 1.0        | -                             | 24 h | 25        | Anhydrous                      |
| 6     | 1.0             | 2.0        | -                             | 24 h | 45        | Anhydrous                      |
| 7     | 1.0             | 1.0        | -                             | 24 h | 32        | Free amine catalyst            |
| 8     | 1.0             | 2.0        | -                             | 24 h | 24        | Free amine catalyst, NMR yield |
| 9     | 1.5             | 1.0        | -                             | 24 h | 30        | Free amine catalyst            |

**General Procedure 4 for the preparation of *anti*- $\beta$ -amino esters from aldehydes.**

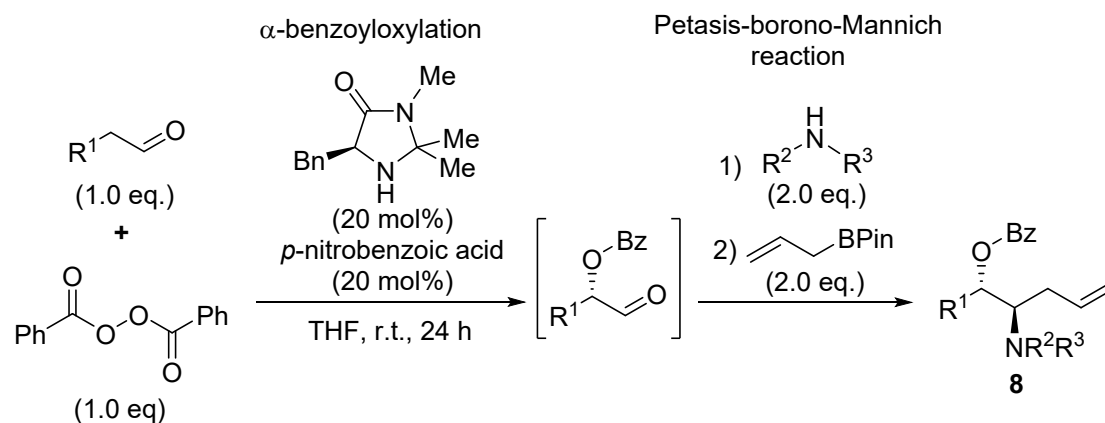

### Preparation of (5S)-(-)-2,2,3-Trimethyl-5-benzyl-4-imidazolidinone free base catalyst

(5S)-(-)-2,2,3-Trimethyl-5-benzyl-4-imidazolidinone monohydrochloride (30.6 mg, 0.12 mmol, 0.20 eq. or 20 mol%) was added to a separating funnel with sat. aq. NaHCO<sub>3</sub> (~2 mL) and extracted with CH<sub>2</sub>Cl<sub>2</sub> (3 x ~2 mL). The combined organic layers were dried over anhydrous K<sub>2</sub>CO<sub>3</sub>, filtered and concentrated *in vacuo*. The pale-yellow residue was used immediately in chemical reactions.

**Part A:  $\alpha$ -benzoyloxylation of aldehydes:** To a 10 mL oven-dried round bottomed flask was added (5S)-(-)-2,2,3-trimethyl-5-benzyl-4-imidazolidinone free base catalyst (30.6 mg, 0.12 mmol, 0.20 eq. or 20 mol%) and distilled THF (1.0 mL) and stirred until dissolved. *Para*-nitrobenzoic acid (20.1 mg, 0.12 mmol, 0.20 eq. or 20 mol%) was then added and the mixture stirred until dissolved. The aldehyde component (0.58 mmol, 1.0 eq.) was then added, followed by benzoyl peroxide (Luperox® 75%, 187.3 mg, 0.58 mmol, 1.0 eq.). The flask was then covered with aluminium foil and stirred with TLC monitoring for 24 h.

**Part B: Petasis-Borono-Mannich reaction:** Upon completion of Part A, the reaction mixture was added to a separating funnel with 1 M aq. HCl (~4 mL) and extracted with CH<sub>2</sub>Cl<sub>2</sub> (3 x ~3 mL). The combined organic layers were washed with brine (~4 mL), then sat. aq. NaHCO<sub>3</sub> (~4 mL), then dried over anhydrous K<sub>2</sub>CO<sub>3</sub>, filtered and concentrated *in vacuo*. To the residue was added DMSO (0.5 mL) and the amine component (1.16 mmol, 2.0 eq.) and the mixture stirred for 5 min. Pinacol allylboronate (224.4  $\mu$ L, 1.16 mmol, 2.0 eq.) was then added and the reaction mixture stirred for 24 h with TLC monitoring. Once complete, the crude reaction mixture was added to a separating funnel with sat. aq. NaHCO<sub>3</sub> (~5 mL) and extracted with CH<sub>2</sub>Cl<sub>2</sub> (3 x ~3 mL). The combined organic layers were dried over anhydrous K<sub>2</sub>CO<sub>3</sub>, filtered and concentrated *in vacuo* and purified by flash column chromatography over silica gel to obtain the aminoester product **8**.

**(4*R*,5*S*)-4-(Benzylamino)undec-1-en-5-yl benzoate (8a)**

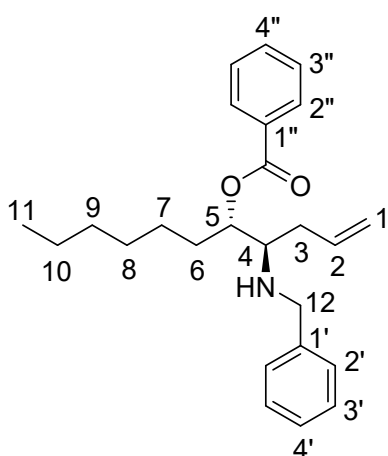

The title compound was prepared according to *General Procedure 4*, using octanal (90.5  $\mu\text{L}$ , 0.58 mmol, 1.0 eq) as the aldehyde component and benzylamine (126.8  $\mu\text{L}$ , 1.16 mmol, 2.0 eq) as the amine component. Purification by flash column chromatography over silica gel eluting with 3:17 EtOAc/*n*-hexane gave the title product **8a** (132.9 mg, 60%) as a pale-yellow oil.

$R_f = 0.48$  (1:4 EtOAc/*n*-hexane).

**dr** 97:3.

$[\alpha]_D^{25} +14.0$  (*c* 0.23,  $\text{CHCl}_3$ ).

**IR (neat):**  $\nu_{\text{max}}$  3064 ( $sp^2$  C-H str.), 2926 ( $sp^3$  C-H str.), 1714 (C=O str.), 1640 (C=C str.), 1602 (Ar C=C str.), 1494 (N-H bend), 1451 (Ar C=C str.), 1269 (C-O str.), 1176 (C-O str.), 996 ( $sp^2$  C-H oop), 913 ( $sp^2$  C-H oop), 734 (Ar C-H oop), 699 (Ar C-H oop)  $\text{cm}^{-1}$ .

**$^1\text{H NMR}$  (400 MHz,  $\text{CDCl}_3$ ):**  $\delta$  8.09 – 8.02 (m, 2H, H-2''), 7.56 (ddt,  $J = 8.0, 6.8, 1.3$  Hz, 1H, H-4''), 7.45 (ddd,  $J = 8.2, 6.7, 1.2$  Hz, 2H, H-3''), 7.33 – 7.17 (m, 5H, H-2', H-3', H-4'), 5.83 (dddd,  $J = 17.0, 10.3, 7.5, 6.7$  Hz, 1H, H-2), 5.31 (dt,  $J = 9.0, 3.8$  Hz, 1H, H-5), 5.15 – 5.07 (m, 2H, H-1), 3.91 (d,  $J = 13.1$  Hz, 1H,  $\text{CH}_A\text{H}_B$  H-12), 3.79 (d,  $J = 13.1$  Hz, 1H,  $\text{CH}_A\text{H}_B$  H-12), 2.88 (ddd,  $J = 8.3, 4.6, 3.8$  Hz, 1H, H-4), 2.40 (dddd,  $J = 14.2, 6.2, 4.6, 1.4$  Hz, 1H, H-3), 2.30 – 2.19 (m, 1H, H-3), 1.87 – 1.64 (m, 2H, H-6), 1.44 – 1.18 (m, 8H, H-7, H-8, H-9, H-10), 0.86 (t,  $J = 7.1$  Hz, 3H, H-11).

**$^{13}\text{C NMR}$  (101 MHz,  $\text{CDCl}_3$ ):**  $\delta$  166.3 (C=O), 140.6 (C-1'), 135.6 (C-2), 132.8 (C-4''), 130.6 (C-1''), 129.7 (C-2''), 128.37 (C-3''), 128.32 (C-2'), 128.2 (C-3'), 126.9 (C-4'), 117.6 (C-1), 75.7 (C-5), 58.8 (C-4), 51.8 (C-12), 35.1 (C-3), 31.7 (C-9), 30.3 (C-6), 29.2 (C-8), 25.8 (C-7), 24.8 (C-9), 22.6 (C-10), 14.0 (C-11).

**HRMS (ESI):**  $m/z$  calculated for  $\text{C}_{25}\text{H}_{34}\text{NO}_2$   $[\text{M}+\text{H}]^+$ : 380.2590, found 380.2596.

**(4*R*,5*S*)-4-((4-Methoxybenzyl)amino)undec-1-en-5-yl benzoate (8b)**

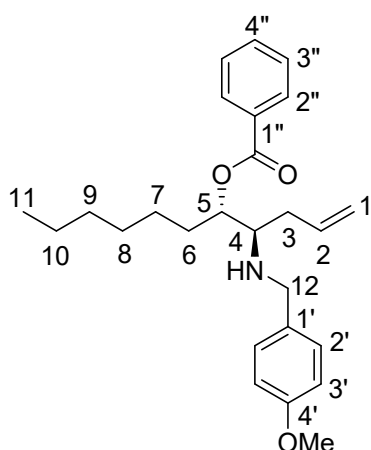

The title compound was prepared according to *General Procedure 4*, using octanal (90.5  $\mu\text{L}$ , 0.58 mmol, 1.0 eq) as the aldehyde component and *para*-methoxybenzylamine (151.6  $\mu\text{L}$ , 1.16 mmol, 2.0 eq) as the amine component. Purification by flash column chromatography over silica gel eluting with 1:9 EtOAc/*n*-hexane gave the title product **8b** (132.9 mg, 60%) as a pale-yellow oil.

$R_f = 0.40$  (1:4 EtOAc/*n*-hexane).

dr 99:1.

$[\alpha]_D^{25} +5.90$  (*c* 0.68,  $\text{CHCl}_3$ ).

**IR (neat):**  $\nu_{\text{max}}$  3071 ( $sp^2$  C-H str.), 2998 ( $sp^3$  C-H str.), 1714 (C=O str.), 1640 (C=C str.), 1611 (Ar C=C str.), 1511 (N-H bend), 1463 (Ar C=C str.), 1270 (C-O str.), 1174 (C-O str.), 997 ( $sp^2$  C-H oop), 915 ( $sp^2$  C-H oop), 809 (Ar C-H oop), 756 Ar C-H oop), 688 (Ar C-H oop)  $\text{cm}^{-1}$ .

**$^1\text{H NMR}$  (400 MHz,  $\text{CDCl}_3$ ):**  $\delta$  8.08 – 8.02 (m, 2H, H-2''), 7.59 – 7.53 (m, 1H, H-4''), 7.48 – 7.41 (m, 2H, H-3''), 7.23 – 7.17 (m, 2H, H-3'), 6.82 – 6.77 (m, 2H, H-2'), 5.90 – 5.76 (m, 1H, H-2), 5.29 (dt,  $J = 9.0, 3.8$  Hz, 1H, H-5), 5.15 – 5.06 (m, 2H, H-1), 3.84 (d,  $J = 12.9$  Hz, 1H,  $\text{CH}_A\text{H}_B$  H-12), 3.77 (s, 3H,  $\text{OCH}_3$ ), 3.73 (d,  $J = 12.9$  Hz, 1H,  $\text{CH}_A\text{H}_B$  H-12), 2.91 – 2.83 (m, 1H, H-4), 2.44 – 2.34 (m, 1H, H-3), 2.30 – 2.18 (m, 1H, H-3), 1.88 – 1.63 (m, 2H, H-6), 1.44 – 1.18 (m, 8H, H-7, H-8, H-9, H-10), 0.86 (t,  $J = 7.0$  Hz, 3H, H-11).

**$^{13}\text{C NMR}$  (101 MHz,  $\text{CDCl}_3$ ):**  $\delta$  166.3 (C=O), 158.6 (C-4'), 135.6 (C-2), 132.8 (C-4''), 132.7 (C-1'), 130.6 (C-1''), 129.7 (C-2''), 129.4 (C-3'), 128.4 (C-3''), 117.5 (C-1), 113.7 (C-2'), 75.7 (C-5), 58.6 (C-4), 55.3 ( $\text{OCH}_3$ ), 51.1 (C-12), 35.1 (C-3), 31.7 (C-9), 30.3 (C-6), 29.2 (C-7), 25.8 (C-8), 22.6 (C-10), 14.0 (C-11).

**HRMS (ESI):**  $m/z$  calculated for  $\text{C}_{26}\text{H}_{36}\text{NO}_3$   $[\text{M}+\text{H}]^+$ : 410.2695, found 410.2690.

**(4*R*,5*S*)-4-(Allylamino)undec-1-en-5-yl benzoate (8c)**



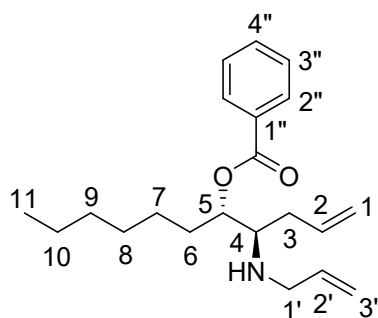

The title compound was prepared according to *General Procedure 4*, using octanal (90.5  $\mu\text{L}$ , 0.58 mmol, 1.0 eq) as the aldehyde component and allylamine (87.0  $\mu\text{L}$ , 1.16 mmol, 2.0 eq) as the amine component. Purification by flash column chromatography over silica gel eluting with 1:4 EtOAc/*n*-hexane gave the title product **8c** (97.9 mg, 51%) as a pale-yellow oil.

$R_f = 0.51$  (1:4 EtOAc/*n*-hexane).

dr 97:3.

$[\alpha]_D^{25} +6.6$  (*c* 0.59,  $\text{CHCl}_3$ ).

**IR (neat):**  $\nu_{\text{max}}$  3074 ( $sp^2$  C-H str.), 2926 ( $sp^3$  C-H str.), 1715 (C=O str.), 1641 (C=C str.), 1602 (Ar C=C str.), 1465 (N-H bend), 1451 (Ar C=C str.), 1268 (C-O str.), 1176 (C-O str.), 994 ( $sp^2$  C-H oop), 914 ( $sp^2$  C-H oop), 709 (Ar C-H oop), 688 (Ar C-H oop)  $\text{cm}^{-1}$ .

**$^1\text{H NMR}$  (400 MHz,  $\text{CDCl}_3$ ):**  $\delta$  8.09 – 8.01 (m, 2H, H-2''), 7.56 (ddt,  $J = 8.0, 6.9, 1.3$  Hz, 1H, H-4''), 7.49 – 7.41 (m, 2H, H-3''), 5.93 – 5.78 (m, 2H, H-2, H-2'), 5.24 (dt,  $J = 9.1, 3.8$  Hz, 1H, H-5), 5.18 – 5.08 (m, 3H, H-1, H-3'), 5.04 (ddt,  $J = 10.2, 2.1, 1.3$  Hz, 1H, H-3'), 3.35 (ddt,  $J = 14.0, 5.8, 1.5$  Hz, 1H,  $\text{CH}_A\text{H}_B$  H-1'), 3.27 (ddt,  $J = 14.0, 6.3, 1.4$  Hz, 1H  $\text{CH}_A\text{H}_B$  H-1'), 2.89 (ddd,  $J = 8.3, 4.8, 3.8$  Hz, 1H, H-4), 2.38 (ddd,  $J = 14.4, 6.3, 4.8, 1.4$  Hz, 1H, H-3), 2.29 – 2.17 (m, 1H, H-3), 1.86 – 1.62 (m, 2H, H-6), 1.51 – 1.18 (m, 8H, H-7, H-8, H-9, H-10), 0.86 (t,  $J = 7.0$  Hz, 3H, H-11).

**$^{13}\text{C NMR}$  (101 MHz,  $\text{CDCl}_3$ ):**  $\delta$  166.3 (C=O), 137.1 (C-2'), 135.6 (C-2), 132.8 (C-4''), 130.6 (C-1''), 129.6 (C-2''), 128.4 (C-3''), 117.5 (C-1), 115.9 (C-3'), 75.9 (C-5), 58.6 (C-4), 50.4 (C-1'), 35.2 (C-3), 31.7 (C-9), 30.3 (C-6), 29.2 (C-8), 25.8 (C-7), 22.6 (C-10), 14.0 (C-11).

**HRMS (ESI):**  $m/z$  calculated for  $\text{C}_{21}\text{H}_{32}\text{NO}_2$   $[\text{M}+\text{H}]^+$ : 330.2433, found 330.2426.

**(4*R*,5*S*)-4-((4-Methoxyphenyl)amino)undec-1-en-5-yl benzoate (8d)**

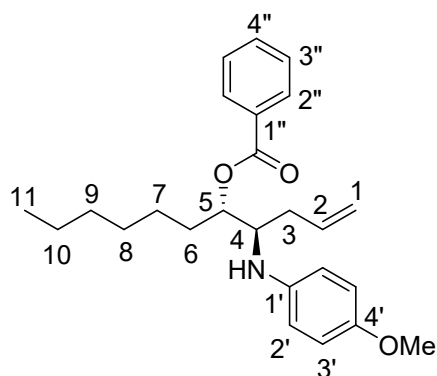

The title compound was prepared according to *General Procedure 4*, using octanal (90.5  $\mu\text{L}$ , 0.58 mmol, 1.0 eq) as the aldehyde component and *para*-anisidine (147.6 mg, 1.16 mmol, 2.0 eq) as the amine component. Purification by flash column chromatography over silica gel eluting with 1:19 EtOAc/*n*-hexane gave the title product **8d** (61.5 mg, 27%) as a brown oil.

$R_f = 0.36$  (1:9 EtOAc/*n*-hexane).

dr 97:3.

$[\alpha]_D^{25} +26.3$  (*c* 0.60,  $\text{CHCl}_3$ ).

**IR (neat):**  $\nu_{\text{max}}$  3395 (N-H str.), 3071 ( $sp^2$  C-H str.), 2927 ( $sp^3$  C-H str.), 1712 (C=O str.), 1641 (C=C str.), 1601 (Ar C=C str.), 1510 (N-H bend), 1451 (Ar C=C str.), 1268 (C-O str.), 1176 (C-O str.), 1000 ( $sp^2$  C-H oop), 914 ( $sp^2$  C-H oop), 817 (Ar C-H oop), 757 (Ar C-H oop), 687 (Ar C-H oop)  $\text{cm}^{-1}$ .

**$^1\text{H NMR}$  (400 MHz,  $\text{CDCl}_3$ ):**  $\delta$  8.05 – 7.98 (m, 2H, H-2''), 7.56 (ddt,  $J = 8.0, 6.9, 1.3$  Hz, 1H, H-4''), 7.48 – 7.41 (m, 2H, H-3''), 6.76 – 6.70 (m, 2H, H-3'), 6.60 – 6.54 (m, 2H, H-2'), 5.88 (dddd,  $J = 16.4, 10.6, 7.4, 6.6$  Hz, 1H, H-2), 5.23 (dt,  $J = 8.0, 4.7$  Hz, 1H, H-5), 5.14 – 5.03 (m, 2H, H-1), 3.72 (s, 3H,  $\text{OCH}_3$ ), 3.64 (dt,  $J = 8.9, 4.7$  Hz, 1H, H-4), 2.51 – 2.42 (m, 1H, H-3), 2.38 – 2.27 (m, 1H, H-3), 1.78 (ddd,  $J = 14.0, 9.6, 5.4$  Hz, 2H, H-6), 1.44 – 1.18 (m, 8H, H-7, H-8, H-9, H-10), 0.88 – 0.80 (m, 3H, H-11).

**$^{13}\text{C NMR}$  (101 MHz,  $\text{CDCl}_3$ ):**  $\delta$  166.2 (C=O), 152.3 (C-4'), 141.7 (C-1'), 134.9 (C-2), 132.9 (C-4''), 130.3 (C-1''), 129.7 (C-2''), 128.4 (C-3''), 117.8 (C-1), 115.3 (C-2'), 114.9 (C-3'), 76.3 (C-5), 56.9 (C-4), 55.8 ( $\text{OCH}_3$ ), 35.4 (C-3), 31.7 (C-9), 31.1 (C-6), 29.2 (C-8), 25.6 (C-7), 22.6 (C-10), 14.0 (C-11).

**HRMS (ESI):**  $m/z$  calculated for  $\text{C}_{25}\text{H}_{34}\text{NO}_3$   $[\text{M}+\text{H}]^+$ : 396.2539, found 396.2538.

**(2*S*,3*R*)-3-(Benzylamino)-1-phenylhex-5-en-2-yl benzoate (8e, Method 1)**

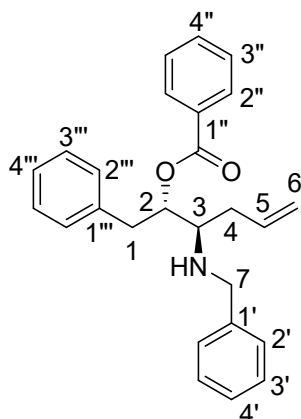

The title compound was prepared according to *General Procedure 4*, using hydrocinnamaldehyde (76.5  $\mu\text{L}$ , 0.58 mmol, 1.0 eq) as the aldehyde component and benzylamine (126.8  $\mu\text{L}$ , 1.16 mmol, 2.0 eq) as the amine component. Purification by flash column chromatography over silica gel eluting with 3:17 EtOAc/*n*-hexane gave the title product **8e** (100.8 mg, 45%) as a pale-yellow oil.

$R_f = 0.36$  (3:17 EtOAc/*n*-hexane).

**dr** 97:3.

$[\alpha]_D^{25} -34.4$  (*c* 0.62,  $\text{CHCl}_3$ ).

**IR (neat):**  $\nu_{\text{max}}$  3062 ( $sp^2$  C-H str.), 2923 ( $sp^3$  C-H str.), 1713 (C=O str.), 1639 (C=C str.), 1601 (Ar C=C str.), 1495 (N-H bend), 1451 (Ar C=C str.), 1268 (C-O str.), 1176 (C-O str.), 994 ( $sp^2$  C-H oop), 914 ( $sp^2$  C-H oop), 697 (Ar C-H oop), 743 (Ar C-H oop)  $\text{cm}^{-1}$ .

**$^1\text{H NMR}$  (400 MHz,  $\text{CDCl}_3$ ):**  $\delta$  8.02 – 7.96 (m, 2H, H-2''), 7.58 – 7.52 (m, 1H, H-4''), 7.46 – 7.39 (m, 2H, H-3''), 7.29 – 7.14 (m, 10H, Ar-*H*), 5.81 (ddt,  $J = 17.7, 9.5, 7.1$  Hz, 1H, H-5), 5.48 (ddd,  $J = 7.8, 5.2, 4.0$  Hz, 1H, H-2), 5.16 – 5.07 (m, 2H, H-6), 3.87 (d,  $J = 13.1$  Hz, 1H,  $\text{CH}_A\text{H}_B$  H-7), 3.76 (d,  $J = 13.1$  Hz, 1H,  $\text{CH}_A\text{H}_B$  H-7), 3.14 (dd,  $J = 14.1, 7.8$  Hz, 1H,  $\text{CH}_A\text{H}_B$  H-1), 3.06 (dd,  $J = 14.1, 5.2$  Hz, 1H,  $\text{CH}_A\text{H}_B$  H-1), 2.93 (dt,  $J = 7.9, 4.4$  Hz, 1H, H-3), 2.52 – 2.42 (m, 1H, H-4), 2.36 – 2.25 (m, 1H, H-4).

**$^{13}\text{C NMR}$  (101 MHz,  $\text{CDCl}_3$ ):**  $\delta$  165.9 (C=O), 140.4 (C-1'), 137.8 (C-1'''), 135.2 (C-5), 132.9 (C-4''), 130.4 (C-1''), 129.6 (C-2''), 129.4 (C-3'''), 128.39 (C-3''), 128.35 (C-2'), 128.33 (C-2'''), 128.24 (C-3'), 126.9 (C-4'), 126.4 (C-4'''), 117.9 (C-6), 76.3 (C-2), 57.9 (C-3), 51.7 (C-7), 36.7 (C-1), 34.9 (C-4).

**HRMS (ESI):**  $m/z$  calculated for  $\text{C}_{26}\text{H}_{28}\text{NO}_2$   $[\text{M}+\text{H}]^+$ : 386.2120, found 386.2121.

**(3*S*,4*R*)-4-(Benzylamino)-2-methylhept-6-en-3-yl benzoate (8g)**

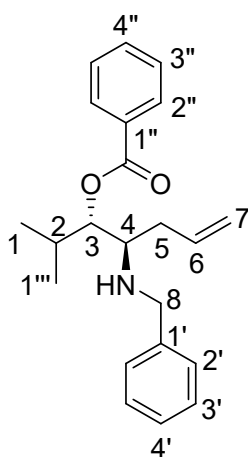

The title compound was prepared according to *General Procedure 4*, using isovaleraldehyde (63.8  $\mu\text{L}$ , 0.58 mmol, 1.0 eq) as the aldehyde component and benzylamine (126.8  $\mu\text{L}$ , 1.16 mmol, 2.0 eq) as the amine component. Purification by flash column chromatography over silica gel eluting with 1:9 EtOAc/*n*-hexane gave the title product **8g** (58.4 mg, 30%) as a pale-yellow oil.

$R_f = 0.57$  (1:4 EtOAc/*n*-hexane).

**dr** 97:3.

$[\alpha]_D^{25} +27.1$  (*c* 0.74,  $\text{CHCl}_3$ ).

**IR (neat):**  $\nu_{\text{max}}$  3063 ( $sp^2$  C-H str.), 2963 ( $sp^3$  C-H str.), 1714 (C=O str.), 1639 (C=C str.), 1602 (Ar C=C str.), 1494 (N-H bend), 1451 (Ar C=C str.), 1267 (C-O str.), 1176 (C-O str.), 698 (Ar C-H oop), 735 (Ar C-H oop)  $\text{cm}^{-1}$ .

**$^1\text{H NMR}$  (400 MHz,  $\text{CDCl}_3$ ):**  $\delta$  8.10 – 8.02 (m, 2H, H-2''), 7.56 (ddt,  $J = 7.9, 6.8, 1.4$  Hz, 1H, H-4''), 7.49 – 7.41 (m, 2H, H-3''), 7.37 – 7.18 (m, 5H, H-2', H-3', H-4'), 5.85 (dddd,  $J = 16.5, 10.6, 7.4, 6.8$  Hz, 1H, H-6), 5.16 (dd,  $J = 6.7, 5.0$  Hz, 1H, H-3), 5.12 – 5.04 (m, 2H, H-7), 3.90 (d,  $J = 13.0$  Hz, 1H,  $\text{CH}_A\text{H}_B$  H-8), 3.79 (d,  $J = 13.0$  Hz, 1H,  $\text{CH}_A\text{H}_B$  H-8), 2.92 (ddd,  $J = 8.5, 5.0, 3.7$  Hz, 1H, H-4), 2.49 – 2.39 (m, 1H, H-5), 2.27 – 2.12 (m, 2H, H-5, H-2), 0.97 (d,  $J = 6.7$  Hz, 3H, H-1), 0.94 (d,  $J = 6.9$  Hz, 3H, H-1''').

**$^{13}\text{C NMR}$  (101 MHz,  $\text{CDCl}_3$ ):**  $\delta$  166.4 (C=O), 140.6 (C-4'), 135.7 (C-6), 132.8 (C-4''), 130.5 (C-1''), 129.7 (C-2''), 128.39 (C-3''), 128.35 (C-2'), 128.29 (C-3'), 126.9 (C-4'), 117.5 (C-7), 78.8 (C-3), 56.8 (C-4), 51.2 (C-8), 34.1 (C-5), 29.3 (H-2), 19.6 (C-1), 18.2 (C-1''').

**HRMS (ESI):**  $m/z$  calculated for  $\text{C}_{22}\text{H}_{28}\text{NO}_2$   $[\text{M}+\text{H}]^+$ : 338.2120, found 338.2129.

**(3*S*,4*R*)-4-((4-Methoxybenzyl)amino)-2-methylhept-6-en-3-yl benzoate (8h)**

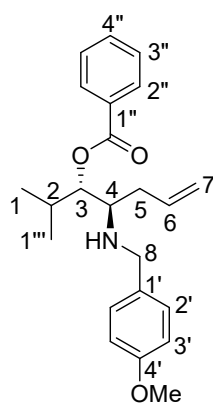

The title compound was prepared according to *General Procedure 4*, using isovaleraldehyde (63.8  $\mu\text{L}$ , 0.58 mmol, 1.0 eq) as the aldehyde component and *para*-methoxybenzylamine (151.6  $\mu\text{L}$ , 1.16 mmol, 2.0 eq) as the amine component. Purification by flash column chromatography over silica gel eluting with 3:17 EtOAc/*n*-hexane gave the title product **8h** (62.8 mg, 29%) as a pale-yellow oil.

$R_f = 0.44$  (1:4 EtOAc/*n*-hexane).

**dr** 99:1.

$[\alpha]_D^{25} +27.9$  (*c* 0.59,  $\text{CHCl}_3$ ).

**IR (neat):**  $\nu_{\text{max}}$  3071 ( $sp^2$  C-H str.), 2933 ( $sp^3$  C-H str.), 1713 (C=O str.), 1640 (C=C str.), 1611 (Ar C=C str.), 1511 (N-H str.) 1464 (Ar C=C str.), 1268, (C-O str.) 1174 (C-O str.), 998 ( $sp^2$  C-H oop), 917 ( $sp^2$  C-H oop), 827 (Ar C-H oop), 757 (Ar C-H oop), 672 (Ar C-H oop)  $\text{cm}^{-1}$ .

**$^1\text{H}$  NMR (400 MHz,  $\text{CDCl}_3$ ):**  $\delta$  8.10 – 8.04 (m, 2H, H-2''), 7.59 – 7.53 (m, 1H, H-4''), 7.49 – 7.42 (m, 2H, H-3''), 7.25 – 7.20 (m, 2H, H-3'), 6.86 – 6.80 (m, 2H, H-2'), 5.90 – 5.78 (m, 1H, H-6), 5.15 (dd,  $J = 6.7, 5.0$  Hz, 1H, H-3), 5.12 – 5.03 (m, 2H, H-7), 3.84 (d,  $J = 12.7$  Hz, 1H,  $\text{CH}_A\text{H}_B$  H-8), 3.79 (s, 3H,  $\text{OCH}_3$ ), 3.72 (d,  $J = 12.7$  Hz, 1H,  $\text{CH}_A\text{H}_B$  H-8), 2.91 (ddd,  $J = 8.5, 5.0, 3.7$  Hz, 1H, H-4), 2.47 – 2.39 (m, 1H, H-5), 2.18 (m, 2H, H-5, H-2), 0.97 (d,  $J = 6.7$  Hz, 3H, H-1), 0.94 (d,  $J = 6.9$  Hz, 3H, H-1'').

**$^{13}\text{C}$  NMR (101 MHz,  $\text{CDCl}_3$ ):**  $\delta$  166.4 (C=O), 158.6 (C-4'), 135.8 (C-6), 132.8 (C-4''), 132.7 (C-1'), 130.5 (C-1''), 129.7 (C-2''), 129.5 (C-3'), 128.4 (C-3''), 117.5 (C-7), 113.7 (C-2'), 78.8 (C-3), 56.6 (C-4), 55.3 ( $\text{OCH}_3$ ), 50.6 (C-8), 34.1 (C-5), 29.3 (C-2), 19.6 (C-1), 18.2 (C-1'').

**HRMS (ESI):**  $m/z$  calculated for  $\text{C}_{23}\text{H}_{30}\text{NO}_3$   $[\text{M}+\text{H}]^+$ : 368.2226, found 368.2236.

**(4*R*,5*S*,6*S*)-4-(Benzylamino)-6,10-dimethylundeca-1,9-dien-5-yl benzoate (8i)**

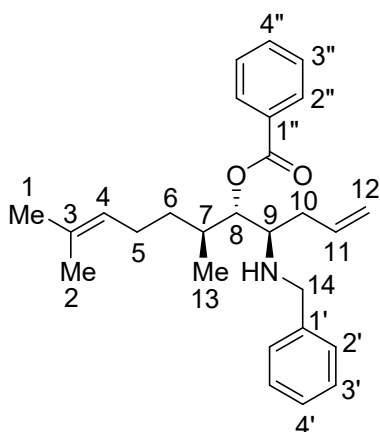

The title compound was prepared according to *General Procedure 4*, using (*S*)-citronellal (105.2  $\mu\text{L}$ , 0.58 mmol, 1.0 eq) as the aldehyde component and benzylamine (126.7  $\mu\text{L}$ , 1.16 mmol, 2.0 eq) as the amine component.  $\text{CH}_2\text{Cl}_2$  was used as the solvent for the PBM reaction. The crude reaction mixture was triturated with  $\text{Et}_2\text{O}$  (1 mL) to remove solid material and the organic rinsings concentrated *in vacuo*. Purification by flash column chromatography over silica gel eluting with 1:19 EtOAc/*n*-hexane gave the title product **8i** (76.3 mg, 32%) as a

pale-yellow oil.

$R_f = 0.25$  (1:19 EtOAc/*n*-hexane 2x elutions).

dr 93:7.

$[\alpha]_D^{23} +23.7$  (*c* 0.87,  $\text{CHCl}_3$ ).

**IR (neat):**  $\nu_{\text{max}}$  3063 ( $sp^2$  C-H str.), 3029 ( $sp^3$  C-H str.), 1715 (C=O str.), 1640 (C=C str.), 1602 (Ar C=C str.), 1494 (N-H bend), 1451 (Ar C=C str.), 1378 ( $\text{CH}_3$  bend), 1268 (C-O str.), 1176 (C-O str.), 995 ( $sp^2$  C-H oop), 916 ( $sp^2$  C-H oop), 736 (Ar C-H oop), 699 (Ar C-H oop)  $\text{cm}^{-1}$ .

**$^1\text{H NMR}$  (400 MHz,  $\text{CDCl}_3$ ):**  $\delta$  8.09 – 8.04 (m, 2H, H-2''), 7.59 – 7.53 (m, 1H, H-4''), 7.48 – 7.42 (m, 2H, H-3''), 7.38 – 7.19 (m, 5H, H-2', H-3', H-4'), 5.84 (dddd,  $J = 16.4, 10.7, 7.4, 6.7$  Hz, 1H, H-11), 5.21 (dd,  $J = 6.6, 5.1$  Hz, 1H, H-8), 5.13 – 5.02 (m, 3H, H-12, H-4), 3.90 (d,  $J = 13.0$  Hz, 1H,  $\text{CH}_A\text{H}_B$  H-14), 3.78 (d,  $J = 12.9$  Hz, 1H,  $\text{CH}_A\text{H}_B$  H-14), 2.95 (ddd,  $J = 8.4, 5.1, 3.55$  Hz, 1H, H-9), 2.43 (dddt,  $J = 14.4, 6.7, 3.55, 1.3$  Hz, 1H, H-10), 2.19 (dddd,  $J = 15.7, 8.4, 4.8, 1.3$  Hz, 1H, H-10), 2.14 – 1.98 (m, 2H, H-7, H-5), 1.93 (appt. hept.,  $J = 7.7$  Hz, 1H, H-5), 1.65 (appt. q,  $J = 1.3$  Hz, 3H, H-1), 1.63 – 1.50 (m, 1H, H-6), 1.57 (appt. d,  $J = 1.2$  Hz, 3H, H-2), 1.29 – 1.18 (m, 1H, H-6), 0.94 (d,  $J = 6.8$  Hz, 3H, H-13).

**$^{13}\text{C NMR}$  (101 MHz,  $\text{CDCl}_3$ ):**  $\delta$  166.4 (C=O), 140.6 (C-1'), 135.7 (C-11), 132.8 (C-4''), 130.6 (C-1''), 129.7 (C-2''), 128.38 (C-3''), 128.36 (C-2'), 128.29 (C-3'), 126.9 (C-4'), 124.5 (C-4), 117.5 (C-12), 78.3 (C-8), 56.7 (C-9), 51.2 (C-14), 34.1 (C-10), 33.8 (C-7), 31.8 (C-6), 25.7 (C-1), 25.4 (C-5), 17.7 (C-2), 16.3 (C-13).

**HRMS (ESI):**  $m/z$  calculated for  $\text{C}_{27}\text{H}_{36}\text{NO}_2$   $[\text{M}+\text{H}]^+$ : 406.2746, found 406.2749.

**(4*S*,5*R*,6*S*)-4-(Benzylamino)-6,10-dimethylundeca-1,9-dien-5-yl benzoate (8j)**

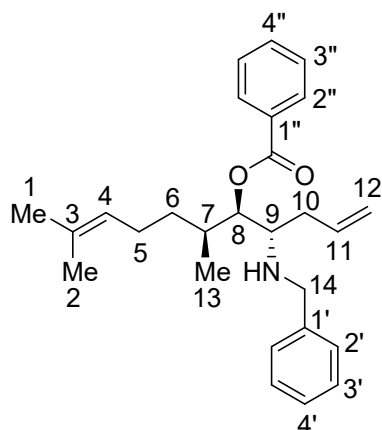

The title compound was prepared according to *General Procedure 4*, using (5*R*)-(-)-2,2,3-trimethyl-5-benzyl-4-imidazolidinone (26.2 mg, 0.12 mmol, 0.20 eq or 20 mol%) as the organocatalyst, (*S*)-citronellal (105.2  $\mu$ L, 0.58 mmol, 1.0 eq) as the aldehyde component and benzylamine (126.7  $\mu$ L, 1.16 mmol, 2.0 eq) as the amine component.  $\text{CH}_2\text{Cl}_2$  was used as the solvent for the PBM reaction. The crude reaction mixture was triturated with  $\text{Et}_2\text{O}$  (1 mL) to remove solid material and the organic rinsings concentrated *in vacuo*. Purification by

flash column chromatography over silica gel eluting with 1:9 EtOAc/*n*-hexane gave the title product **8j** (61.8 mg, 26%) as a pale-yellow oil.

$R_f = 0.46$  (1:9 EtOAc/*n*-hexane).

**dr** 90:10; 92:8 (isolated).

$[\alpha]_D^{23} -11.5$  (*c* 0.95,  $\text{CHCl}_3$ ).

**IR (neat):**  $\nu_{\text{max}}$  3063 ( $sp^2$  C-H str.), 3029 ( $sp^3$  C-H str.), 1715 (C=O str.), 1640 (C=C str.), 1602 (Ar C=C str.), 1494 (N-H bend), 1451 (Ar C=C str.), 1378 ( $\text{CH}_3$  bend), 1268 (C-O str.), 1176 (C-O str.), 996 ( $sp^2$  C-H oop), 916 ( $sp^2$  C-H oop), 735 (Ar C-H oop), 699 (Ar C-H oop)  $\text{cm}^{-1}$ .

**$^1\text{H NMR}$  (400 MHz,  $\text{CDCl}_3$ ):**  $\delta$  8.10 – 8.03 (m, 2H, H-2''), 7.60 – 7.53 (m, 1H, H-4''), 7.49 – 7.42 (m, 2H, H-3''), 7.39 – 7.20 (m, 5H, H-2', H3', H-4'), 5.91 – 5.79 (m, 1H, H-11), 5.22 (dd,  $J = 6.5, 4.9$  Hz, 1H, H-8), 5.13 – 5.03 (m, 3H, H-12, H-4), 3.86 (d,  $J = 12.9$  Hz, 1H  $\text{CH}_A\text{H}_B$  H-14), 3.80 (d,  $J = 12.9$  Hz, 1H,  $\text{CH}_A\text{H}_B$  H-14), 2.96 (ddd,  $J = 7.6, 6.5, 3.9$  Hz, 1H, H-9), 2.46 – 2.37 (m, 1H, H-10), 2.25 – 2.09 (m, 2H, H-10, H-7), 2.08 – 1.98 (m, 2H, H-5), 1.67 (appt. d,  $J = 0.9$  Hz, 3H, H-1), 1.59 (appt. d,  $J = 1.3$  Hz, 3H, H-2), 1.47 – 1.33 (m, 1H, H-6), 1.27 – 1.15 (m, 1H, H-6), 0.98 (d,  $J = 6.8$  Hz, 3H, H-13).

**$^{13}\text{C NMR}$  (101 MHz,  $\text{CDCl}_3$ ):**  $\delta$  166.3 (C=O), 140.6 (C-1'), 135.5 (C-11), 132.9 (C-4''), 131.7 (C-3), 130.5 (C-1''), 129.7 (C-2''), 128.4 (C-3''), 128.33 (C-2'), 128.30 (C-3'), 126.9 (C-4'), 124.3 (C-12), 117.7 (C-4), 77.6 (C-8), 56.7 (C-9), 51.2 (C-14), 34.4 (C-10), 33.9 (C-6), 33.5 (C-7), 25.7 (C-1), 25.4 (C-5), 17.7 (C-2), 14.5 (C-13).

**HRMS (ESI):**  $m/z$  calculated for  $\text{C}_{27}\text{H}_{36}\text{NO}_2$   $[\text{M}+\text{H}]^+$ : 406.2746, found 406.2734.

**(*S*)-1-Oxo-3-phenylpropan-2-yl benzoate (2,  $\text{R}^1 = \text{Bn}$ )**

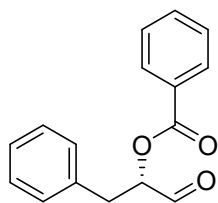

The title compound was prepared according to that described in Vaismaa *et al.* 2009 (1.0 mmol scale),<sup>8</sup> with the following modifications from Kano *et al.* 2009.<sup>9</sup> At the conclusion of the reaction, the reaction mixture was added to a separating funnel with 1 M aq. HCl (~4 mL) and extracted with CH<sub>2</sub>Cl<sub>2</sub> (3 x ~3 mL). The combined organic layers were washed with NaCl brine (~4 mL), then sat. aq. NaHCO<sub>3</sub> (~4 mL), then dried over anhydrous K<sub>2</sub>CO<sub>3</sub>, filtered and concentrated *in vacuo*. The crude material was purified by flash column chromatography eluting with 3:17 EtOAc/*n*-hexane, obtaining the title product **2** (140.5 mg, 55%). The spectroscopic data for **2** was identical to that previously reported.<sup>5</sup>

$R_f = 0.23$  (1:4 EtOAc/*n*-hexane).

### General Procedure 5 for the preparation of amino esters from aldehyde **2** ( $R^1 = \text{Bn}$ )

To a 10 mL round-bottomed flask was added **2** ( $R^1 = \text{Bn}$ ) (~30-60 mg, 1.0 eq.) and anhydrous CH<sub>2</sub>Cl<sub>2</sub> (0.5 mL), and the mixture stirred until the substrate was dissolved. To the reaction mixture was added an amine component (1.2 eq.) and the mixture stirred for 5 mins. Pinacol allylboronate (1.2 eq.) was then added and the reaction vessel flushed with nitrogen, sealed and stirred for 12 h with TLC monitoring. Upon completion of the reaction, the reaction mixture was added to a separating funnel with sat. aq. NaHCO<sub>3</sub> (~2 mL) and extracted with CH<sub>2</sub>Cl<sub>2</sub> (3 x ~2 mL). The combined organic layers were dried over K<sub>2</sub>CO<sub>3</sub>, filtered, concentrated *in vacuo* and purified by flash column chromatography over silica gel to obtain the pure  $\beta$ -amino ester product.

### (2*S*,3*R*)-3-(Benzylamino)-1-phenylhex-5-en-2-yl benzoate (**8e**, Method 2)

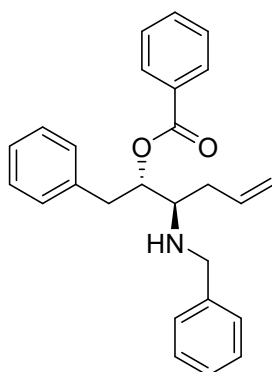

The title compound was prepared according to *General Procedure 5*, using **2** ( $R^1 = \text{Bn}$ ) (30.7 mg, 0.121 mmol, 1.0 eq.) and benzylamine (15.9  $\mu\text{L}$ , 0.145 mmol, 1.2 eq.) as the amine component. The compound was purified by flash column chromatography over silica gel eluting with 3:17 EtOAc/*n*-hexane, obtaining the title product **8e** (25.2 mg, 54%) as a pale-yellow oil. The spectroscopic data was identical to those previously obtained for **8e**.

$R_f = 0.34$  (3:17 EtOAc/*n*-hexane).

**dr** 99:1.



$[\alpha]_D^{23} -36.1$  (*c* 1.26, CHCl<sub>3</sub>).

**LRMS (ESI):** *m/z* calculated for C<sub>16</sub>H<sub>28</sub>NO<sub>2</sub> [M+H]<sup>+</sup>: 386, found 386 (100%).

**(2*S*,3*R*)-3-((4-Methoxybenzyl)amino)-1-phenylhex-5-en-2-yl benzoate (8f)**

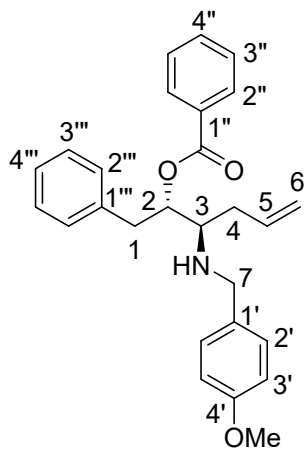

The title compound was prepared according to *General Procedure 5*, using **2** (R<sup>1</sup> = Bn) (34.0 mg, 0.134 mmol, 1.0 eq.) and *para*-methoxybenzylamine (21.0 μL, 0.160 mmol, 1.2 eq.) as the amine component. The compound was purified by flash column chromatography over silica gel eluting with 1:3 EtOAc/*n*-hexane, obtaining the title product **8f** (33.2 mg, 60%) as a pale-yellow oil.

**R<sub>f</sub>** = 0.43 (1:3 EtOAc/*n*-hexane).

**dr** 99:1

$[\alpha]_D^{23} -35.1$  (*c* 0.59, CHCl<sub>3</sub>).

**IR (neat):**  $\nu_{\max}$  3063 (*sp*<sup>2</sup> C-H str.), 3028 (*sp*<sup>3</sup> C-H str.), 1639 (C=C str.), 1610 (Ar C=C str.), 1452 (Ar C=C str.), 1713 (C=O str.), 1496 (N-H bend), 1269 (C-O str.), 1174 (C-O str.), 995 (*sp*<sup>2</sup> C-H oop), 751 (Ar C-H oop), 700 (Ar C-H oop), 822 (Ar C-H oop) cm<sup>-1</sup>.

**<sup>1</sup>H NMR (400 MHz, CDCl<sub>3</sub>):**  $\delta$  8.01 – 7.95 (m, 2H, H-2''), 7.54 (m, 1H, H-4''), 7.46 – 7.39 (m, 2H, H-3''), 7.28 – 7.17 (m, 5H, H-2''', H-3''', H-4'''), 7.15 (m, 2H, H-3'), 6.78 (m, 2H, H-2'), 5.81 (ddt, *J* = 18.8, 9.5, 7.1 Hz, 1H, H-5), 5.47 (ddd, *J* = 7.8, 5.3, 4.1 Hz, 1H, H-2), 5.15 – 5.08 (m, 2H, H-6), 3.80 (d, *J* = 12.9 Hz, 1H, CH<sub>A</sub>H<sub>B</sub> H-7), 3.77 (s, 3H, OCH<sub>3</sub>), 3.69 (d, *J* = 12.9 Hz, 1H, CH<sub>A</sub>H<sub>B</sub> H-7), 3.13 (dd, *J* = 14.1, 7.8 Hz, 1H, CH<sub>A</sub>H<sub>B</sub> H-1), 3.06 (dd, *J* = 14.1, 5.3 Hz, 1H, CH<sub>A</sub>H<sub>B</sub> H-1), 2.91 (dt, *J* = 7.8, 4.4 Hz, 1H, H-3), 2.51 – 2.41 (m, 1H, H-4), 2.34 – 2.24 (m, 1H, H-4).

**<sup>13</sup>C NMR (101 MHz, CDCl<sub>3</sub>):**  $\delta$  165.9 (C=O), 158.6 (C-4'), 137.9 (C-1'''), 135.3 (C-5), 132.9 (C-4''), 132.6 (C-1'), 130.4 (C-1''), 129.6 (C-2''), 129.42 (C-3'''), 129.39 (C-3'), 128.4 (C-3''), 128.3 (C-2'''), 126.4 (C-4'''), 117.8 (C-6), 113.7 (C-2'), 76.3 (C-2), 57.7 (C-3), 55.3 (OCH<sub>3</sub>), 51.0 (C-7), 36.7 (C-1), 34.9 (C-4).

**HRMS (ESI):** *m/z* calculated for C<sub>27</sub>H<sub>30</sub>NO<sub>3</sub> [M+H]<sup>+</sup>: 416.2226, found 416.2245.

## Optimisation of the ester deprotection

**Table SI-6:** Optimisation of the ester deprotection of *O*-protected PBM products. It was discovered that basic hydrolysis procedures resulted in a mixture of the starting material, the target product, and a more stable amide product where the *O*-protecting ester had migrated to the secondary amine. Therefore, a variety of methods were attempted with variations on reagents, solvent and concentration. The ester was found to be stable to acidic hydrolysis methods, however reduction with  $\text{LiAlH}_4$  resulted in complete reduction of the ester and simple purification by silica gel plug (Entry 10).

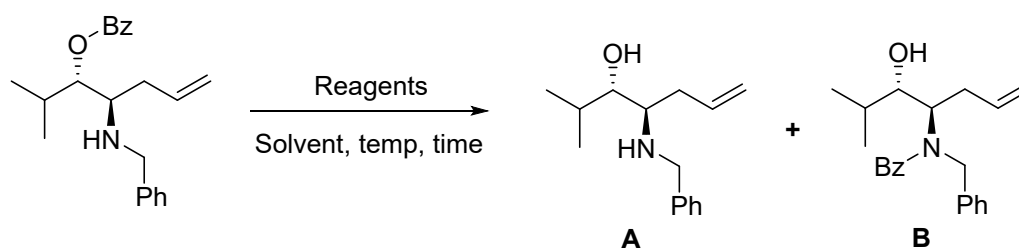

| Entry | Reagents                                           | Solvent                                | Temp. (°C) | Time | Yield A (%) | Yield B (%) | Notes                                                                               |
|-------|----------------------------------------------------|----------------------------------------|------------|------|-------------|-------------|-------------------------------------------------------------------------------------|
| 1     | $\text{K}_2\text{CO}_3$ (5.5. eq.)                 | MeOH (0.019M)                          | r.t.       | 2 d  | -           | 36          | Isolated yield                                                                      |
| 2     | $\text{LiOH}\cdot\text{H}_2\text{O}$ (2.7 eq.)     | MeOH (0.02M)                           | r.t.       | 18 h | 25          | 61          | NMR yield                                                                           |
| 3     | $\text{LiOH}\cdot\text{H}_2\text{O}$ (5.0 eq.)     | THF: $\text{H}_2\text{O}$ 3:1 (0.066M) | r.t.       | 24 h | -           | 8           | “                                                                                   |
| 4     | $\text{LiBH}_4$ (1.2 eq.)                          | THF (10 drops MeOH) (0.15M)            | r.t.       | 2 h  | -           | trace       | 37% yield of hydrogenated product. Insep. from SM by FCC.                           |
| 5     | $\text{LiAlH}_4$ (2.8 eq.)                         | THF (0.048M)                           | r.t.       | 2 h  | -           | -           | Apparent quant. yield (ESI-MS and $^1\text{H}$ NMR). Product could not be isolated. |
| 6     | $\text{LiOH}\cdot\text{H}_2\text{O}$ (3.1 eq.)     | MeOH (0.1067M)                         | r.t.       | 20 h | 25          | 64          |                                                                                     |
| 7     | 15% ethanolic HCl (0.0876M)                        |                                        | r.t.-80 °C | 22 h | 7           | -           | r.t. 18 h, 50 °C 2h, 80 °C 2 h                                                      |
| 8     | 1:1 MeOH/4.73 M methanolic $\text{NH}_3$ (0.0493M) |                                        | r.t.       | 42 h | 19          | 30          |                                                                                     |

|    |                                  |               |               |      |    |   |                                      |
|----|----------------------------------|---------------|---------------|------|----|---|--------------------------------------|
| 9  | AcOH (0.104M)                    |               | r.t.-80<br>°C | 24 h | -  | - | No reaction. r.t.<br>18 h, 80 °C 6 h |
| 10 | LiAlH <sub>4</sub> (13.4<br>eq.) | THF (0.0138M) | r.t.          | 2 h  | 38 | - | Small scale,<br>measuring error      |
| 11 | LiAlH <sub>4</sub> (2.6 eq.)     | THF (0.116)   | r.t.          | 2 h  | 60 | - | Larger 50 mg<br>scale                |

### General Procedure 6 for the reduction of benzoyl amino esters

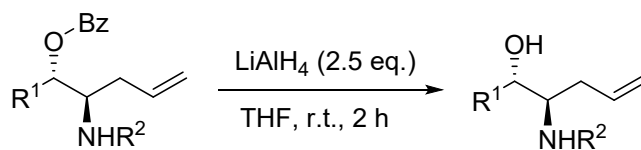

To a 10 mL oven-dried nitrogen purged round bottomed flask was added crushed lithium aluminium hydride (2.5 eq.) and distilled anhydrous THF (0.3 mL) and the mixture was gently stirred under nitrogen for 2 mins. The benzoyl amino ester substrate (1.0 eq.) was then dissolved under nitrogen in distilled THF (0.3 mL) and transferred by syringe into the reaction vessel, with continuous stirring. The flask containing the substrate was then rinsed under nitrogen with aliquots of distilled THF (3 x 0.2 mL) and the rinsings transferred by syringe to the reaction vessel. The reaction mixture was then stirred under nitrogen for 2 h with TLC monitoring.

At the conclusion of the reaction, the reaction mixture was transferred to a separating funnel with sat. aq. Rochelle's salt solution (~2 mL) and extracted with  $\text{CH}_2\text{Cl}_2$  (3 x ~3 mL). The combined organic layers were dried over  $\text{K}_2\text{CO}_3$ , filtered and concentrated *in vacuo* and the residue dissolved in EtOAc (~4 mL). This organic phase was washed with sat. aq. NaCl brine (6 x ~3 mL), then concentrated *in vacuo* to afford the free amino alcohol product.

#### (4*R*,5*S*)-4-(Benzylamino)undec-1-en-5-ol (*ent*-7a)

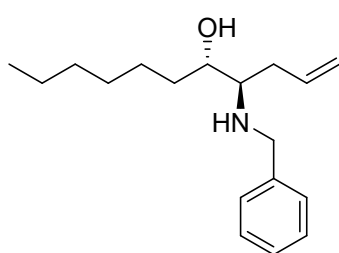

The title compound was prepared according to *General Procedure 6*, using **8a** as the benzoyl amino ester substrate and obtaining *ent*-**7a** (24.9 mg, 73%) as a pale-yellow oil. The spectroscopic data obtained was identical to those for **7a**.

*ee* 98%. Chiralpak IG-3 column and guard, 15% 2-propanol/hexane, flow rate 0.6 mL.min<sup>-1</sup>, column oven 30 °C, PDA 207 nm.  $R_t$  (mins) 6.92 (minor enantiomer), 7.84 (major enantiomer).

$[\alpha]_D^{25} -5.82$  (*c* 0.50,  $\text{CHCl}_3$ ).

**LRMS (ESI):** *m/z* calculated for  $\text{C}_{18}\text{H}_{30}\text{NO}$   $[\text{M}+\text{H}]^+$ : 276, found 276 (100%).

**(4*R*,5*S*)-4-((4-Methoxybenzyl)amino)undec-1-en-5-ol (*ent*-7b)**

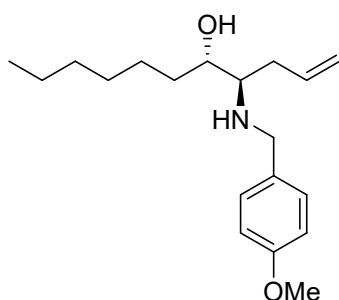

The title compound was prepared according to *General Procedure 6*, using **8b** as the benzoyl amino ester substrate and obtaining *ent*-**7b** (22.8 mg, 94%) as a pale-yellow oil. The spectroscopic data obtained was identical to those for **7b**.

*ee* >99%. Chiralpak IG-3 column and guard, 20% 2-propanol/hexane, flow rate 0.6 mL.min<sup>-1</sup>, column oven 30 °C,

PDA 207 nm. *R*<sub>t</sub> (mins) 9.39 (major enantiomer), minor enantiomer not observed.

$[\alpha]_D^{25}$  -3.68 (*c* 1.14, CHCl<sub>3</sub>).

**LRMS (ESI):** *m/z* calculated for C<sub>19</sub>H<sub>32</sub>NO<sub>2</sub> [M+H]<sup>+</sup>: 306, found 306 (100%).

**(4*R*,5*S*)-4-(Allylamino)undec-1-en-5-ol (SI-10)**

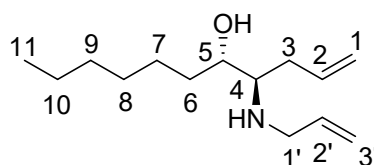

The title compound was prepared according to *General Procedure 6*, using **8c** as the benzoyl amino ester substrate.

Excess benzyl alcohol by-product was removed by high vacuum (6 h). **SI-10** (24.1 mg, 78%) was obtained as a pale-

yellow oil, which solidified to an amorphous solid under high vacuum.

*R*<sub>f</sub> = 0.29 (3:7 EtOAc/*n*-hexane).

*dr* 97:3.

*ee* 96%. Chiralpak IG-3 column and guard, 20% 2-propanol/hexane, flow rate 0.4 mL.min<sup>-1</sup>, column oven 30 °C, PDA 207 nm. *R*<sub>t</sub> (mins) 8.69 (minor enantiomer), 9.54 (major enantiomer).

$[\alpha]_D^{25}$  -18.2 (*c* 1.21, CHCl<sub>3</sub>).

**IR (neat):** *v*<sub>max</sub> 3281 (N-H str.), 3081 (*sp*<sup>2</sup> C-H str.), 2919 (*sp*<sup>3</sup> C-H str.), 1640 (C=C str.), 1464 (N-H bend) 1074 (C-O str.), 996 (*sp*<sup>2</sup> C-H oop), 912 (*sp*<sup>2</sup> C-H oop), 723 (CH<sub>2</sub> chain bend) cm<sup>-1</sup>.

**<sup>1</sup>H NMR (400 MHz, CDCl<sub>3</sub>):**  $\delta$  5.92 – 5.68 (m, 2H, H-2, H-2'), 5.21 – 5.05 (m, 4H, H-1, H-3'), 3.66 (dt, *J* = 8.3, 3.3 Hz, 1H, H-5), 3.28 (ddt, *J* = 14.2, 5.3, 1.6 Hz, 1H, CH<sub>A</sub>H<sub>B</sub> H-1'), 3.19 (ddt, *J* = 14.2, 6.6, 1.3 Hz, 1H, CH<sub>A</sub>H<sub>B</sub> H-1'), 2.56 (ddd, *J* = 9.7, 4.0, 3.3 Hz, 1H, H-4), 2.32 – 2.22 (m, 1H, H-3), 2.12 – 2.01 (m, 1H, H-3), 1.62 – 1.21 (m, 10H, H-6, H-7, H-8, H-9, H-10), 1.00 – 0.77 (m, 3H, H-11).

$^{13}\text{C}$  NMR (101 MHz,  $\text{CDCl}_3$ ):  $\delta$  136.8 (C-2'), 135.9 (C-2), 118.0 (C-1), 115.9 (C-3'), 69.6 (C-5), 59.5 (C-4), 49.9 (C-1'), 32.8 (C-3), 32.2 (C-6), 31.8 (C-9), 29.5 (C-8), 26.5 (C-7), 22.6 (C-10), 14.1 (C-11).

HRMS (ESI):  $m/z$  calculated for  $\text{C}_{14}\text{H}_{28}\text{NO}$   $[\text{M}+\text{H}]^+$ : 226.2171, found 226.2161.

**(4*R*,5*S*)-4-((4-Methoxyphenyl)amino)undec-1-en-5-ol (SI-11)**

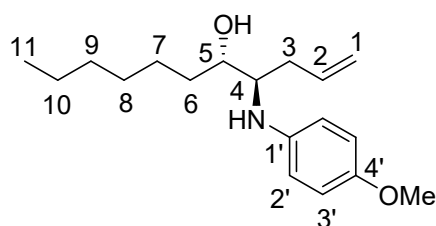

The title compound was prepared according to *General Procedure 6*, using **8d** as the benzoyl amino ester substrate. Excess benzyl alcohol by-product was removed by high vacuum (6 h) and the crude purified by flash column chromatography over silica gel eluting with 1%

MeOH/ $\text{CH}_2\text{Cl}_2$ , obtaining the title product **SI-11** (16.8 mg, 73%) as a brown oil.

$R_f$  = 0.52 (3:7 EtOAc/*n*-hexane); 0.65 (1% MeOH/ $\text{CH}_2\text{Cl}_2$ ).

**dr** 97:3

**ee** 86%. Chiralpak IG-3 column and guard, 15% 2-propanol/hexane, flow rate 0.5 mL.min<sup>-1</sup>, column oven 30 °C, PDA 207 nm.  $R_t$  (mins) 12.34 (minor enantiomer), 12.77 (major enantiomer).

$[\alpha]_D^{25}$  -18.5 ( $c$  0.80,  $\text{CHCl}_3$ ).

**IR (neat)**:  $\nu_{\text{max}}$  3387 (O-H str.), 3073 ( $sp^2$  C-H str.), 2927 ( $sp^3$  C-H str.), 1640 (C=C str.), 1618 (Ar C=C str.), 1509 (N-H bend) 1464 (Ar C=C str.), 1038 (C-O str.), 995 ( $sp^2$  C-H oop), 911 ( $sp^2$  C-H oop), 817 (Ar C-H oop), 725 ( $\text{CH}_2$  chain bend)  $\text{cm}^{-1}$ .

$^1\text{H}$  NMR (400 MHz,  $\text{CDCl}_3$ ):  $\delta$  6.82 – 6.74 (m, 2H, H-3'), 6.66 – 6.58 (m, 2H, H-2'), 5.83 (dddd,  $J$  = 16.8, 10.1, 7.7, 6.4 Hz, 1H, H-2), 5.18 – 5.05 (m, 2H, H-1), 3.83 – 3.72 (m, 1H, H-5), 3.75 (s, 3H,  $\text{OCH}_3$ ), 3.33 (dt,  $J$  = 8.4, 4.3 Hz, 1H, H-4), 2.44 – 2.23 (m, 2H, H-3), 1.61 – 1.43 (m, 2H, H-6), 1.41 – 1.23 (m, 8H, H-7, H-8, H-9, H-10), 0.95 – 0.84 (m, 3H, H-11).

$^{13}\text{C}$  NMR (101 MHz,  $\text{CDCl}_3$ ):  $\delta$  152.6 (C-4'), 141.7 (C-1'), 135.6 (C-2), 117.6 (C-1), 115.5 (C-2'), 114.9 (C-3'), 72.1 (C-5), 58.3 (C-4), 55.8 ( $\text{OCH}_3$ ), 33.7 (C-3), 32.9 (C-6), 31.8 (C-9), 29.4 (C-8), 26.3 (C-7), 22.6 (C-10), 14.1 (C-11).

HRMS (ESI):  $m/z$  calculated for  $\text{C}_{18}\text{H}_{30}\text{NO}_2$   $[\text{M}+\text{H}]^+$ : 292.2277, found 292.2282.

**(2*S*,3*R*)-3-(Benzylamino)-1-phenylhex-5-en-2-ol (*ent*-7c)**

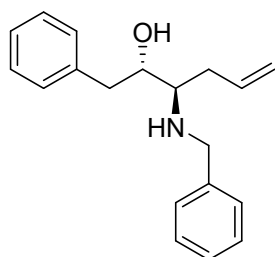

The title compound was prepared according to *General Procedure 6*, using **8e** (Method 1) as the benzoyl amino ester substrate. Excess benzyl alcohol by-product was removed by high vacuum (6 h). **Ent-7c** (35.9 mg, 95%) was obtained as a pale-yellow oil, which crystallised under high vacuum. The spectroscopic data obtained was identical to those for **7c**.

*ee* 88%. Chiralpak IG-3 column and guard, 15% 2-propanol/hexane, flow rate 0.6 mL.min<sup>-1</sup>, column oven 30 °C, PDA 207 nm. R<sub>t</sub> (mins) 9.28 (minor enantiomer), 11.19 (major enantiomer).

$[\alpha]_D^{25} -2.89$  (*c* 1.80, CHCl<sub>3</sub>).

**LRMS (ESI):** *m/z* calculated for C<sub>19</sub>H<sub>24</sub>NO [M+H]<sup>+</sup>: 282, found 282 (100%).

**(2*S*,3*R*)-3-(Benzylamino)-1-phenylhex-5-en-2-ol (*ent*-7c).**

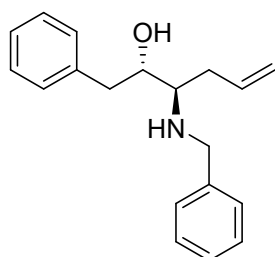

The title compound was prepared according to *General Procedure 6*, not including the brine washes, using **8e** (Method 2) as the benzoyl amino ester substrate. The crude material was purified by silica plug eluting with 1:4 and 1:1 EtOAc/*n*-hexane and excess benzyl alcohol by-product was removed by high vacuum (6 h), obtaining **ent-7c** (10.8 mg, 70%) as a pale-yellow oil, which crystallised under high vacuum. The spectroscopic data obtained was identical to those for **7c**.

*ee* 94%. Chiralpak IG-3 column and guard, 15% 2-propanol/hexane, flow rate 0.6 mL.min<sup>-1</sup>, column oven 30 °C, PDA 207 nm. R<sub>t</sub> (mins) 9.65 (minor enantiomer), 11.68 (major enantiomer).

$[\alpha]_D^{24} -0.63$  (*c* 0.54, CHCl<sub>3</sub>).

**LRMS (ESI):** *m/z* calculated for C<sub>19</sub>H<sub>24</sub>NO [M+H]<sup>+</sup>: 282, found 282 (100%).

**(2*S*,3*R*)-3-((4-Methoxybenzyl)amino)-1-phenylhex-5-en-2-ol (SI-12).**

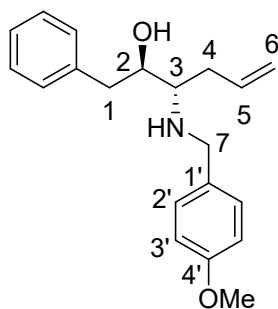

The title compound was prepared according to *General Procedure 6*, not including the brine washes, using **8f** as the benzoyl amino ester substrate. The crude material was purified by silica plug eluting with 1:4 and 1:1 EtOAc/*n*-hexane and excess benzyl alcohol by-product was removed by high vacuum (6 h), obtaining **SI-12** (4.3 mg, 27%) as a pale-yellow oil.

*ee* 96%. Chiralpak IG-3 column and guard, 15% 2-propanol/hexane, flow rate 1.0 mL.min<sup>-1</sup>, column oven 30 °C, PDA 207 nm. *R*<sub>t</sub> (mins) 8.57 (minor enantiomer), 11.61 (major enantiomer).

$[\alpha]_D^{25}$  -2.19 (*c* 0.28, CHCl<sub>3</sub>).

**IR (neat):**  $\nu_{\max}$  3329 (O-H str.), 3062 (*sp*<sup>2</sup> C-H str.), 2922 (*sp*<sup>3</sup> C-H str.), 1639 (C=C str.), 1610 (Ar C=C str.), 1496 (N-H bend) 1454 (Ar C=C str.), 1077 (C-O str.), 699 (Ar C-H oop), 749 (Ar C-H oop), 821 (Ar C-H oop) cm<sup>-1</sup>.

**<sup>1</sup>H NMR (400 MHz, CDCl<sub>3</sub>):**  $\delta$  7.34 – 7.19 (m, 5H, Ar-*H*), 7.16 (d, *J* = 8.6 Hz, 2H, H-3'), 6.84 (d, *J* = 8.6 Hz, 2H, H-2'), 5.72 (dtd, *J* = 18.1, 9.0, 5.5 Hz, 1H, H-5), 5.16 – 5.06 (m, 2H, H-6), 3.97 (ddd, *J* = 8.4, 4.75, 3.4 Hz, 1H, H-2), 3.79 (s, 3H, OCH<sub>3</sub>), 3.74 (d, *J* = 12.9 Hz, 1H, CH<sub>A</sub>H<sub>B</sub> H-7), 3.63 (d, *J* = 12.9 Hz, 1H, CH<sub>A</sub>H<sub>B</sub> H-7), 2.80 (dd, *J* = 13.8, 8.5 Hz, 1H, CH<sub>A</sub>H<sub>B</sub> H-1), 2.72 (dd, *J* = 13.8, 4.75 Hz, 1H, CH<sub>A</sub>H<sub>B</sub> H-1), 2.64 (dt, *J* = 9.5, 3.8 Hz, 1H, H-3), 2.45 – 2.37 (m, 1H, H-4), 2.20 (dt, *J* = 14.3, 9.1 Hz, 1H, H-4).

**<sup>13</sup>C NMR (101 MHz, CDCl<sub>3</sub>):**  $\delta$  158.7 (C-4'), 139.2 (*ipso*-C), 135.6 (C-5), 132.3 (C-1'), 129.3 (C-3'), 129.1 (*m*-C), 128.5 (*o*-C), 126.3 (*p*-C), 118.2 (C-6), 113.9 (C-2'), 71.2 (C-2), 59.3 (C-3), 55.3 (OCH<sub>3</sub>), 50.9 (C-7), 38.7 (C-1), 33.0 (C-4).

**HRMS (ESI):** *m/z* calculated for C<sub>20</sub>H<sub>26</sub>NO<sub>2</sub> [M+H]<sup>+</sup>: 312.1964, found 312.1974.

**(3*S*,4*R*)-4-(Benzylamino)-2-methylhept-6-en-3-ol (ent-7e)**

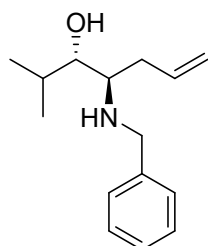

The title compound was prepared according to *General Procedure 6*, using **8g** as the benzoyl amino ester substrate and obtaining **ent-7e** (19.5 mg, 60%) as a pale-yellow oil. The spectroscopic data obtained was identical to those for **7e**.



*ee* 90%. Chiralpak IG-3 column and guard, 15% 2-propanol/hexane, flow rate 0.6 mL.min<sup>-1</sup>, column oven 30 °C, PDA 207 nm. R<sub>t</sub> (mins) 7.46 (minor enantiomer), 7.74 (major enantiomer).

$[\alpha]_D^{25} +12.5$  (*c* 0.87, CHCl<sub>3</sub>).

**LRMS (ESI):** *m/z* calculated for C<sub>15</sub>H<sub>24</sub>NO [M+H]<sup>+</sup>: 234, found 234 (100%).

**(3*S*,4*R*)-4-((4-Methoxybenzyl)amino)-2-methylhept-6-en-3-ol (*ent*-7f)**

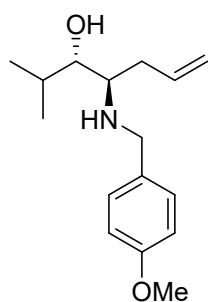

The title compound was prepared according to *General Procedure 8*, using **8h** as the benzoyl amino ester substrate. Excess benzyl alcohol by-product was removed by high vacuum (6 h) and the crude purified by silica plug eluting with 1:4 and 1:1 EtOAc/*n*-hexane, obtaining *ent*-7f (16.4 mg, 72%) as a pale-yellow oil. The spectroscopic data obtained was identical to those for **7f**.

*ee* 94%. Chiralpak IG-3 column and guard, 15% 2-propanol/hexane, flow rate 0.6 mL.min<sup>-1</sup>, column oven 30 °C, PDA 207 nm. R<sub>t</sub> (mins) 10.36 (minor enantiomer), 11.06 (major enantiomer).

$[\alpha]_D^{25} +12.0$  (*c* 0.73, CHCl<sub>3</sub>).

**LRMS (ESI):** *m/z* calculated for C<sub>16</sub>H<sub>26</sub>NO<sub>2</sub> [M+H]<sup>+</sup>: 264, found 264 (100%).

**(2*S*,3*R*)-3-(Benzylamino)-4-methyl-1-phenylhex-5-en-2-yl benzoate (9a)**

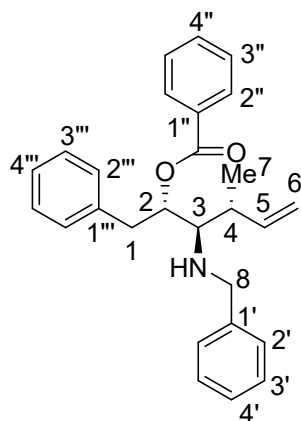

To an NMR tube was added **2** (R<sup>1</sup> = Bn) (20.4 mg, 0.0802 mmol, 1.0 eq.), 1,2,3-trimethoxybenzene (4.4 mg, 0.0265 mmol, 0.33 eq.) as an internal standard and CD<sub>2</sub>Cl<sub>2</sub> (~500 μL). A 500 MHz <sup>1</sup>H NMR spectrum was then acquired. Benzylamine (10.5 μL, 0.0962 mmol, 1.2 eq.) was then added and mixed by shaking and another 500 MHz <sup>1</sup>H NMR spectrum was acquired to confirm the formation of the imine reactive intermediate. Pinacol (*E*)-crotylboronate (19.7 μL, 0.0962 mmol, 1.2. eq.) was then added and mixed by shaking. 500 MHz <sup>1</sup>H NMR spectra were

acquired at *t* = 0, 5, 21, 30 and 44 h, then at 4, 8 11 and 14 d. The solvent was topped up periodically as the reaction progressed. Upon completion of the reaction, the reaction mixture was added to a separating funnel with sat. aq. NaHCO<sub>3</sub> (~2 mL) and extracted with CH<sub>2</sub>Cl<sub>2</sub> (3

x ~2 mL). The combined organic layers were dried over K<sub>2</sub>CO<sub>3</sub>, filtered, concentrated *in vacuo* and purified by flash column chromatography over silica gel eluting with 3:17 EtOAc/*n*-hexane, obtaining the title product **9a** (10.2 mg, 32%) as a yellow oil. Enantiomeric excess was determined by diastereomeric salt formation according to the literature procedure using (*R*)- and (*S*)-1,1'-binaphthyl-2,2'-diylphosphoric acid<sup>10</sup> and analysis of their respective <sup>1</sup>H, COSY, TOCSY and HSQC spectra.

**R<sub>f</sub>** = 0.40 (3:17 EtOAc/*n*-hexane).

**dr** 95:5.

**ee** 78%.

[α]<sub>D</sub><sup>23</sup> -53.9 (c 0.51, CHCl<sub>3</sub>).

**<sup>1</sup>H NMR (400 MHz, CDCl<sub>3</sub>):** δ 7.98 – 7.93 (m, 2H, H-2''), 7.53 (ddt, *J* = 8.7, 6.9, 1.3 Hz, 1H, H-4''), 7.45 – 7.38 (m, 2H, H-3''), 7.34 – 7.24 (m, 5H, H-2', H-3', H-4'), 7.24 – 7.11 (m, 5H, H-2''', H-3''', H-4'''), 5.93 (ddd, *J* = 17.5, 9.7, 7.9 Hz, 1H, H-5), 5.51 (ddd, *J* = 7.45, 5.6, 4.1 Hz, 1H, H-2), 5.13 – 5.06 (m, 2H, H-6), 3.96 (d, *J* = 12.9 Hz, 1H, CH<sub>A</sub>H<sub>B</sub> H-8), 3.81 (d, *J* = 12.9 Hz, 1H, CH<sub>A</sub>H<sub>B</sub> H-8), 3.11 (appt. dd, *J* = 7.45, 5.8 Hz, 2H, H-1), 2.89 (dd, *J* = 6.5, 4.1 Hz, 1H, H-3), 2.47 (appt. h, *J* = 6.8 Hz, 1H, H-4), 1.16 (d, *J* = 6.8 Hz, 3H, H-7).

**<sup>13</sup>C NMR (101 MHz, CDCl<sub>3</sub>):** δ 165.8 (C=O), 141.9, (C-5) 140.7 (C-1'), 138.2 (C-1'''), 132.8 (C-4''), 130.4 (C-1''), 129.5 (C-2''), 129.4 (C-3'''), 128.34 (C-2'), 128.33 (C-3''), 128.29 (C-2'''), 128.24 (C-3'), 127.0 (C-4'), 126.3 (C-4'''), 114.6 (C-6), 77.4 (C-2), 63.1 (C-3), 53.8 (C-8), 40.4 (C-4), 36.0 (C-1), 16.7 (C-7).

**HRMS (ESI):** *m/z* calculated for C<sub>27</sub>H<sub>30</sub>NO<sub>2</sub> [M+H]<sup>+</sup>: 400.2277, found 400.2280.

**(2*S*,3*R*)-3-(Benzylamino)-4-methyl-1-phenylhex-5-en-2-yl benzoate (9b)**

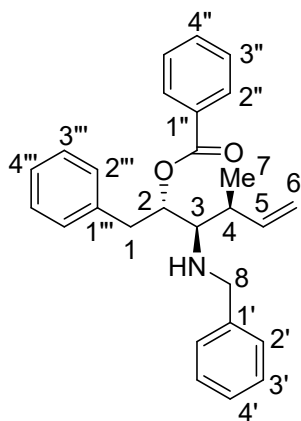

The title compound was prepared as per **9a**, however using pinacol (*Z*)-crotylboronate. 500 MHz <sup>1</sup>H NMR spectra were acquired at t = 0, 5 and 22 h, then at 2, 4, 7, 9, 11, 14, 16, 18, 21, 23, 25 and 28 d. The compound was purified by flash column chromatography over silica gel eluting with 1:9 EtOAc/*n*-hexane, obtaining the title product **9b** (13.9 mg, 46%) as a yellow oil. Enantiomeric excess was again determined by diastereomeric salt formation according to the

literature procedure using (*R*)- and (*S*)-1,1'-binaphthyl-2,2'-diylphosphoric acid<sup>10</sup> and analysis of their respective <sup>1</sup>H, COSY, TOCSY and HSQC spectra.

**R<sub>f</sub>** = 0.40 (3:17 EtOAc/*n*-hexane).

**dr** 99:1.

**ee** 88%.

$[\alpha]_D^{23}$  -60.1 (*c* 0.70, CHCl<sub>3</sub>).

**<sup>1</sup>H NMR (400 MHz, CDCl<sub>3</sub>):** δ 8.00 – 7.94 (m, 2H, H-2''), 7.56 – 7.50 (m, 1H, H-4''), 7.44 – 7.38 (m, 2H, H-3''), 7.30 – 7.12 (m, 10H, Ar-*H*), 5.88 – 5.77 (m, 1H, H-5), 5.54 (dt, *J* = 8.6, 4.2 Hz, 1H, H-2), 5.12 – 5.04 (m, 2H, H-6), 3.97 (d, *J* = 12.9 Hz, 1H, CH<sub>A</sub>H<sub>B</sub> H-8), 3.77 (d, *J* = 12.9 Hz, 1H, CH<sub>A</sub>H<sub>B</sub> H-8), 3.20 (dd, *J* = 14.3, 8.8 Hz, 1H, CH<sub>A</sub>H<sub>B</sub> H-1), 3.12 (dd, *J* = 14.3, 4.4 Hz, 1H, CH<sub>A</sub>H<sub>B</sub> H-1), 2.80 (dd, *J* = 6.2, 3.9 Hz, 1H, H-3), 2.53 – 2.42 (m, 1H, H-4), 1.17 (d, *J* = 6.8 Hz, 3H, H-7).

**<sup>13</sup>C NMR (101 MHz, CDCl<sub>3</sub>):** δ 165.9 (C=O), 141.0 (C-5), 140.7 (C-1'), 138.3 (C-1'''), 132.8 (C-4''), 130.4 (C-1''), 129.6 (C-2''), 129.3 (C-3'''), 128.34 (C-2'), 128.33 (C-3''), 128.31 (C-2'''), 128.2 (C-3'), 126.9 (C-4'), 126.3 (C-4'''), 115.7 (C-6), 77.2 (C-2), 63.2 (C-3), 53.9 (C-8), 40.1 (C-4), 36.3 (C-1), 18.0 (C-7).

**HRMS (ESI):** *m/z* calculated for C<sub>27</sub>H<sub>30</sub>NO<sub>2</sub> [M+H]<sup>+</sup>: 400.2277, found 400.2291.

# NMR spectra and Chiral HPLC traces

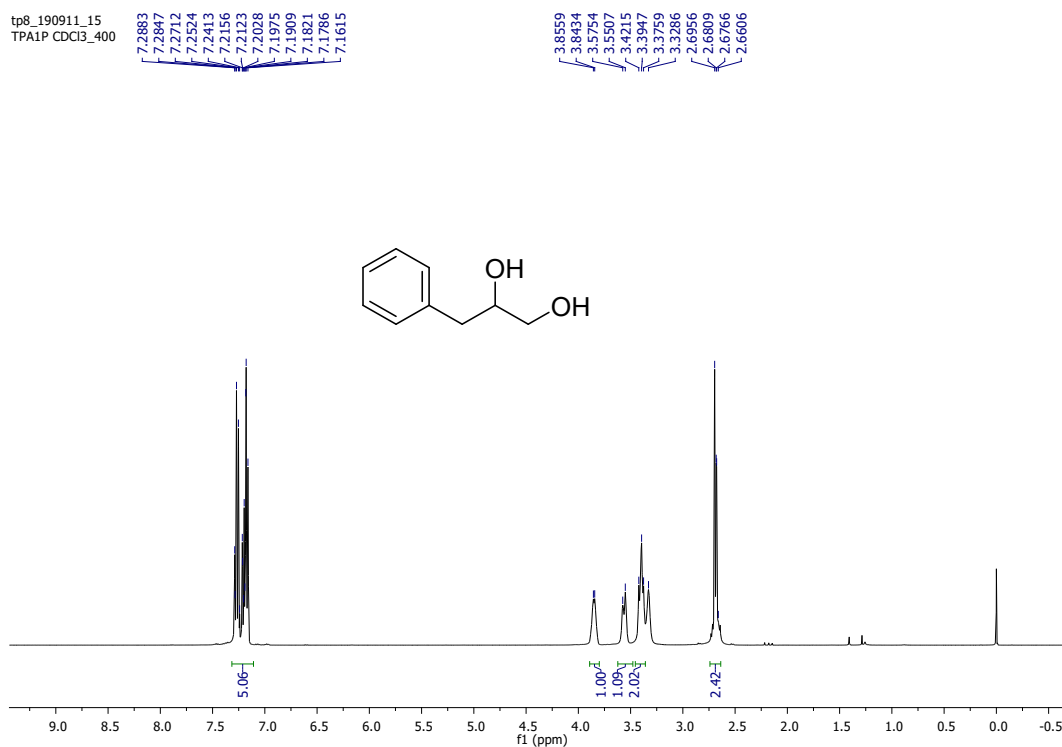

**Figure 1.** <sup>1</sup>H NMR spectrum of **3** (R<sup>1</sup> = Bn) (400 MHz, CDCl<sub>3</sub>)

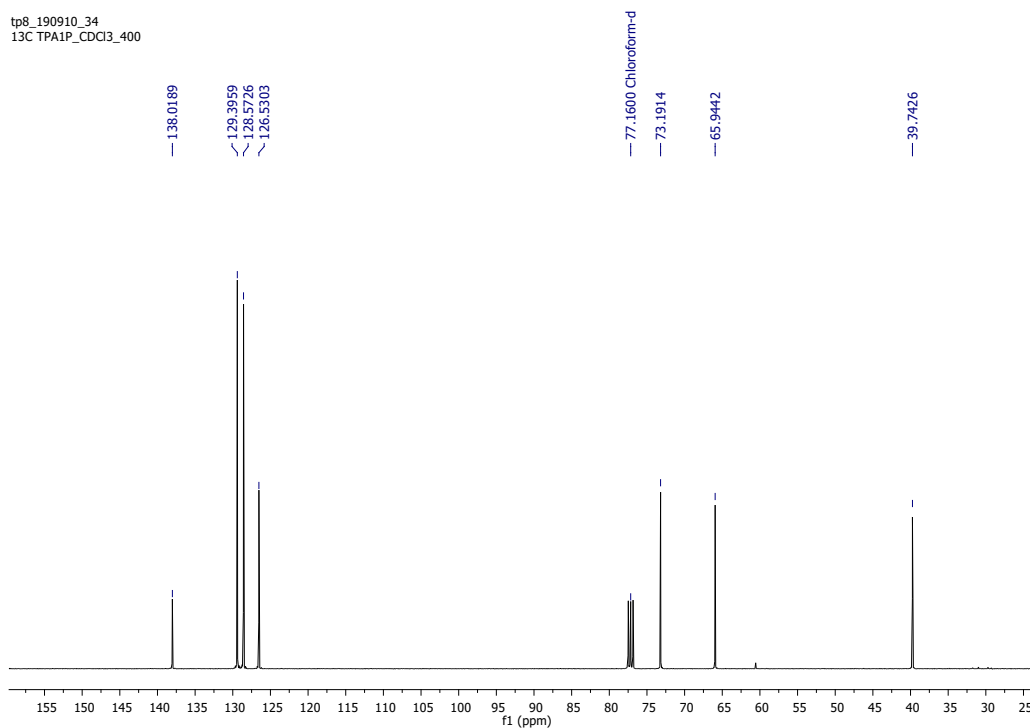

**Figure 2.** <sup>13</sup>C NMR spectrum of **3** (R<sup>1</sup> = Bn) (100 MHz, CDCl<sub>3</sub>)

tp8\_190911\_52  
TPA2F MeOD\_500  
PROTONRO MeOD (C:\Avance\pyne) new 52

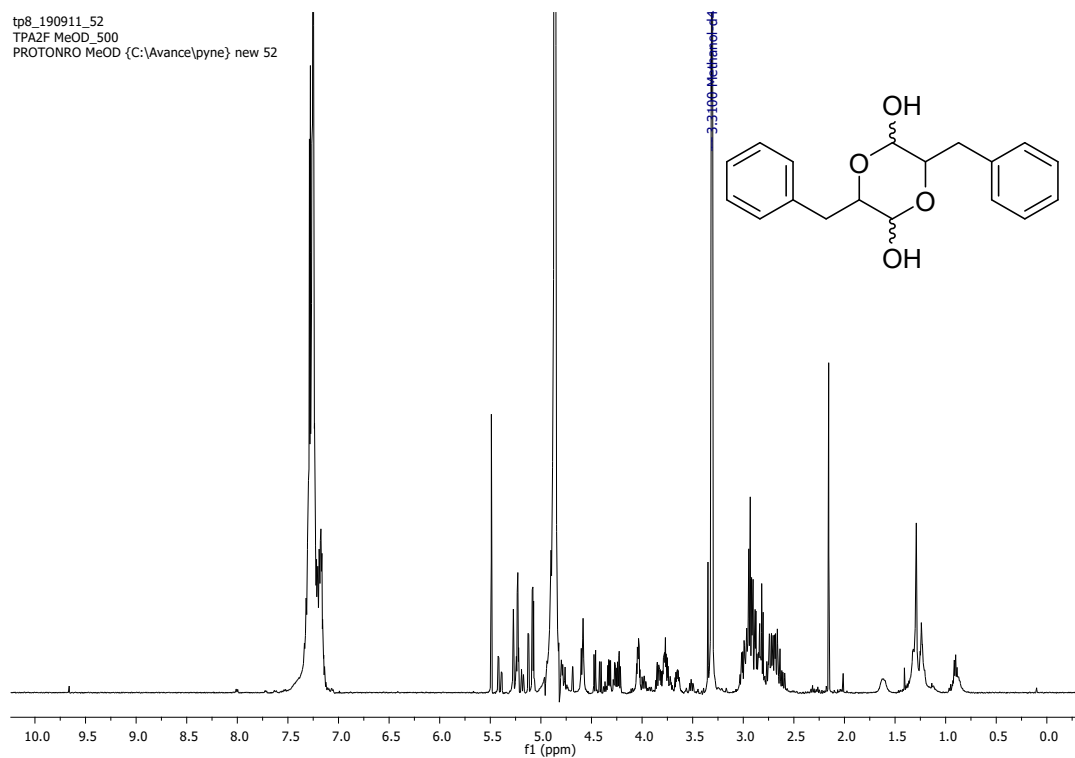

**Figure 3.** <sup>1</sup>H NMR spectrum of 4 (R<sup>1</sup> = Bn) (500 MHz, MeOH-*d*<sub>4</sub>), mixture of diastereomers and possibly oligomers.

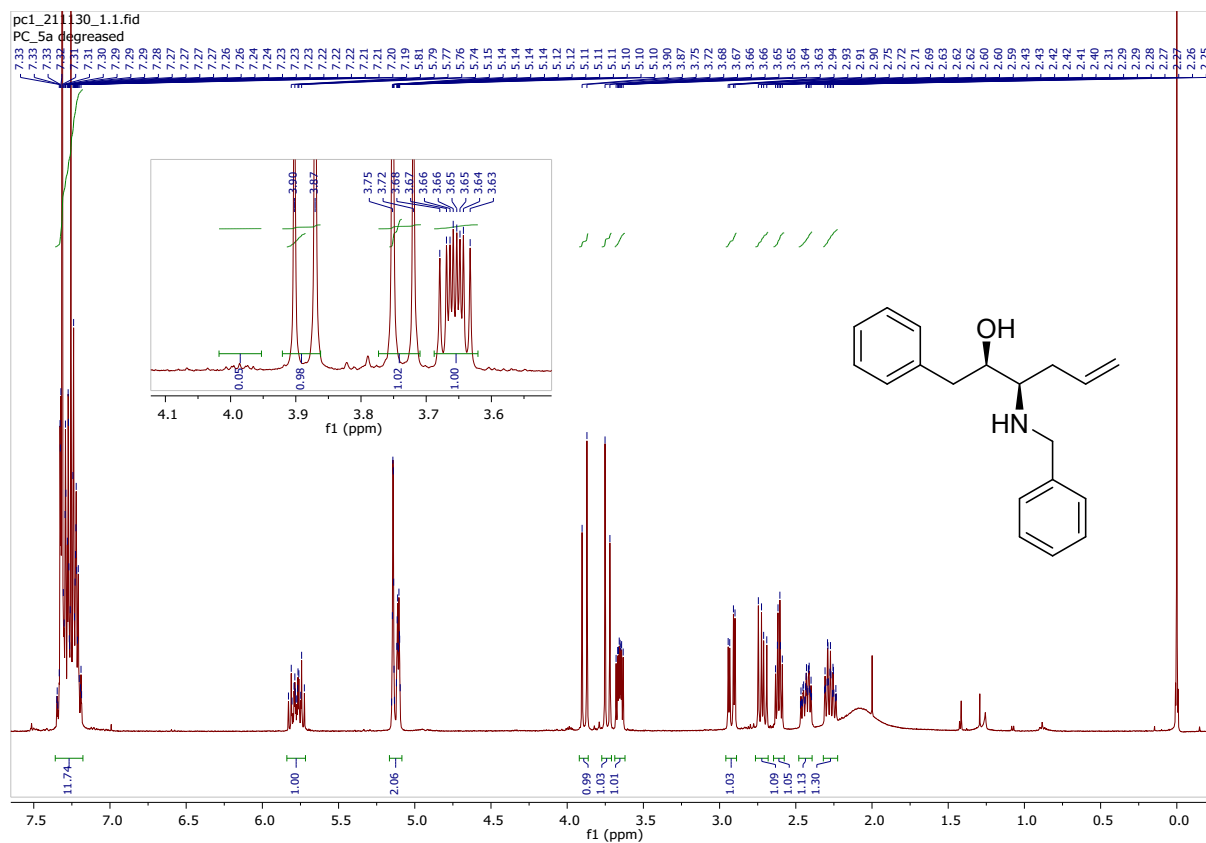

Figure 4.  $^1\text{H}$  NMR spectrum of *rac*-5a (400 MHz,  $\text{CDCl}_3$ , dr 95:5)

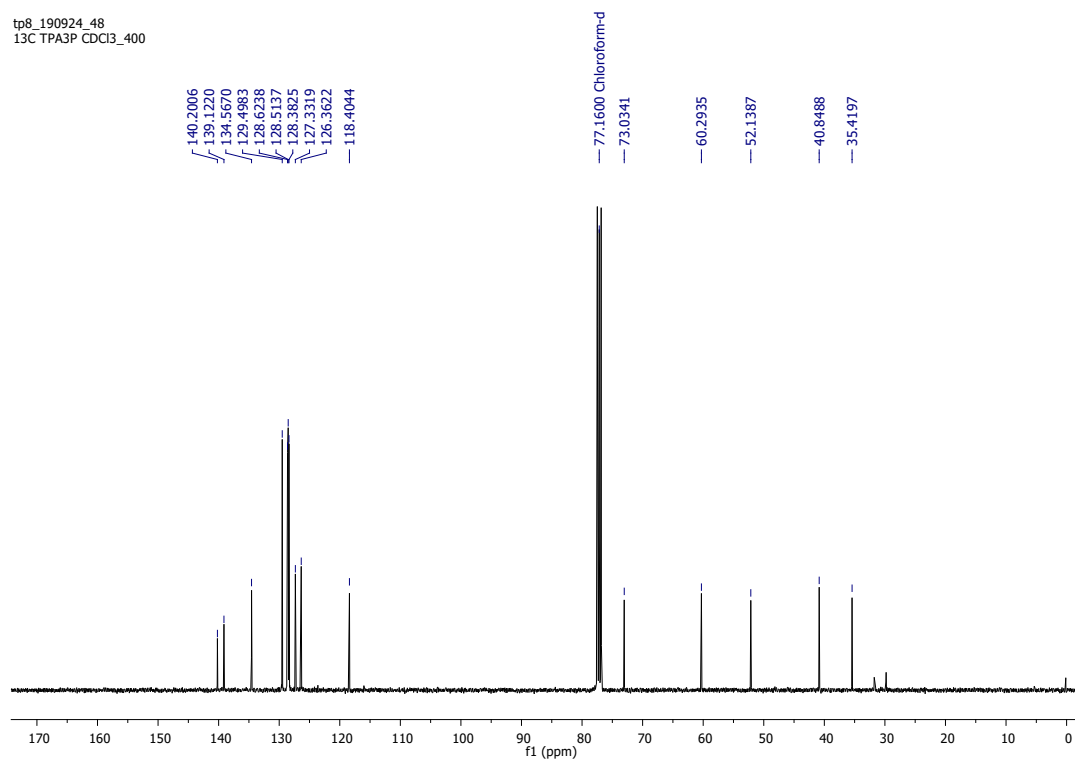

Figure 5.  $^{13}\text{C}$  NMR spectrum of *rac*-5a (101 MHz,  $\text{CDCl}_3$ )

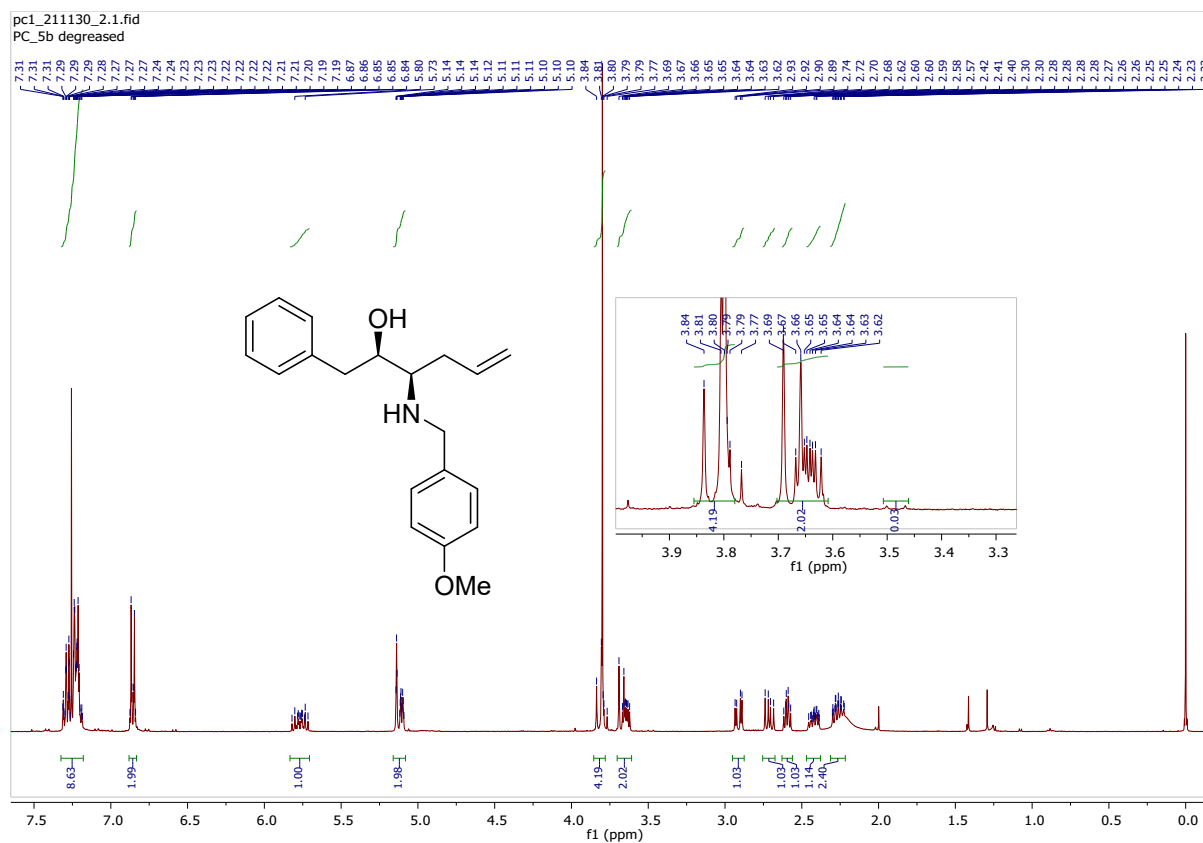

Figure 6. <sup>1</sup>H NMR spectrum of *rac*-5b (400 MHz, CDCl<sub>3</sub>, dr = 98:2)

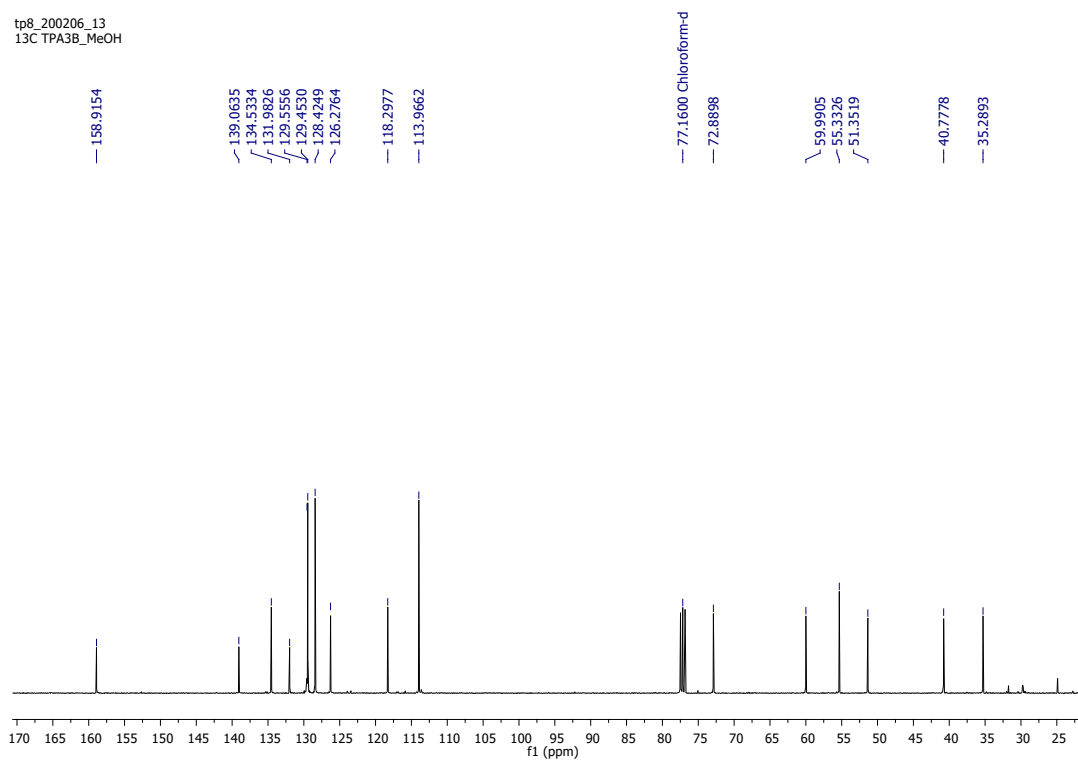

Figure 7. <sup>13</sup>C NMR spectrum of *rac*-5b (101 MHz, CDCl<sub>3</sub>)

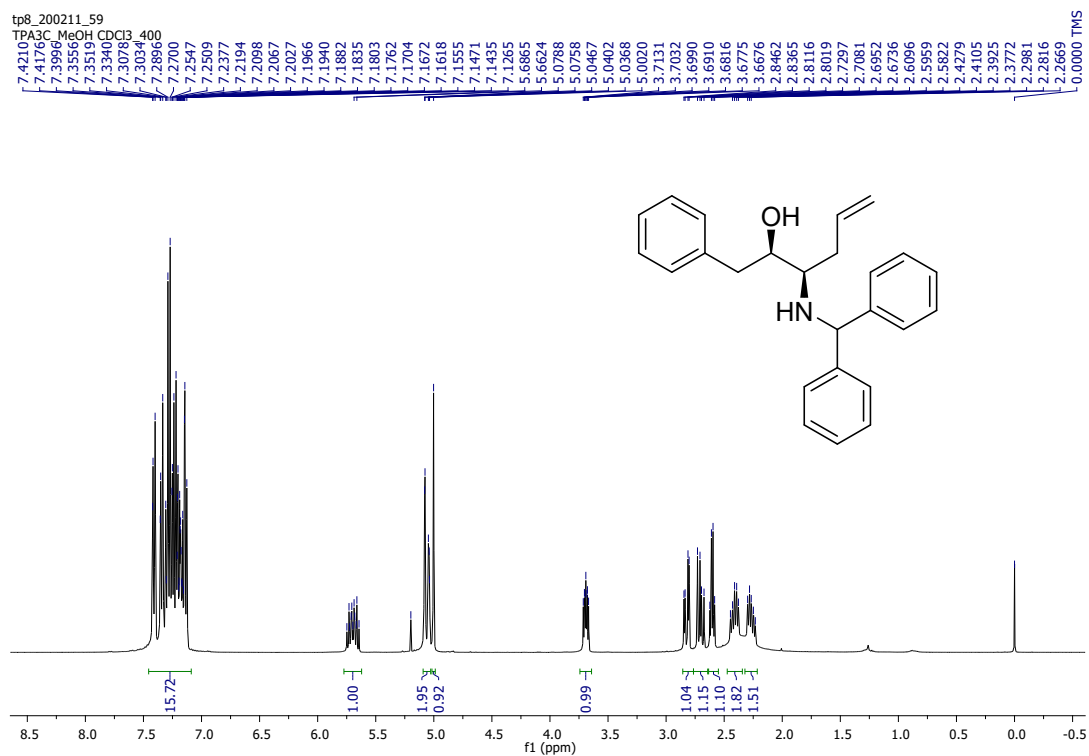

**Figure 8.**  $^1\text{H}$  NMR spectrum of *rac-5c* (400 MHz,  $\text{CDCl}_3$ , dr = >98:2)

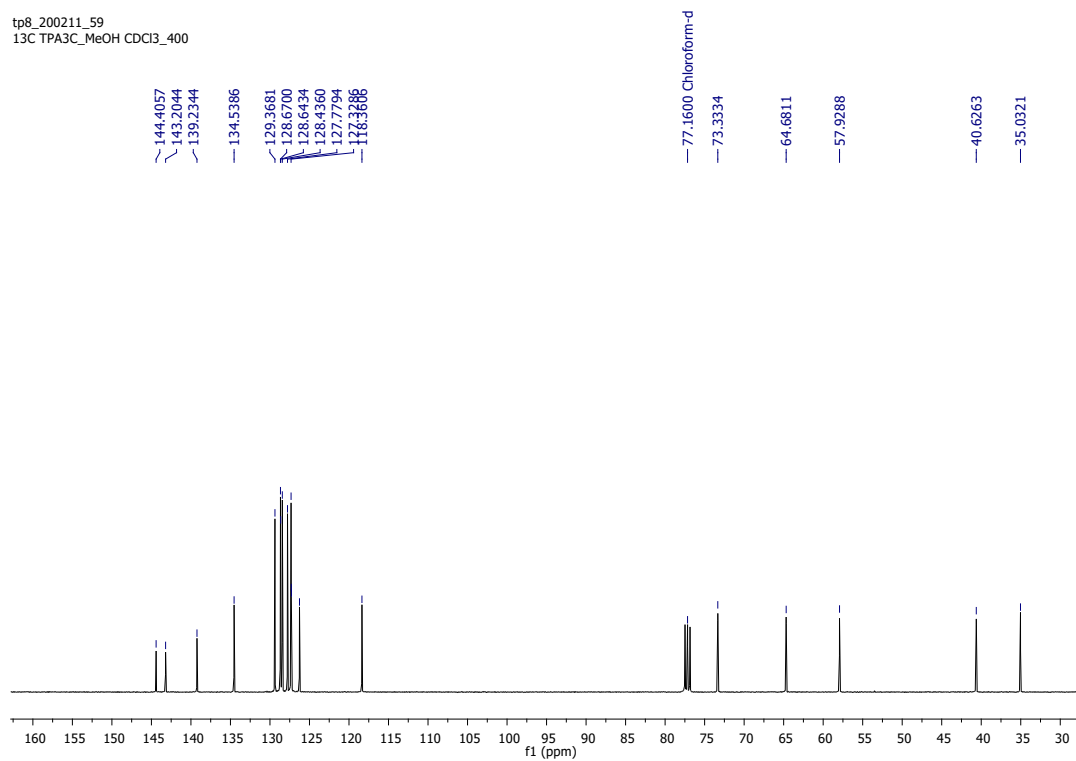

**Figure 9.**  $^{13}\text{C}$  NMR spectrum of *rac-5c* (101 MHz,  $\text{CDCl}_3$ )



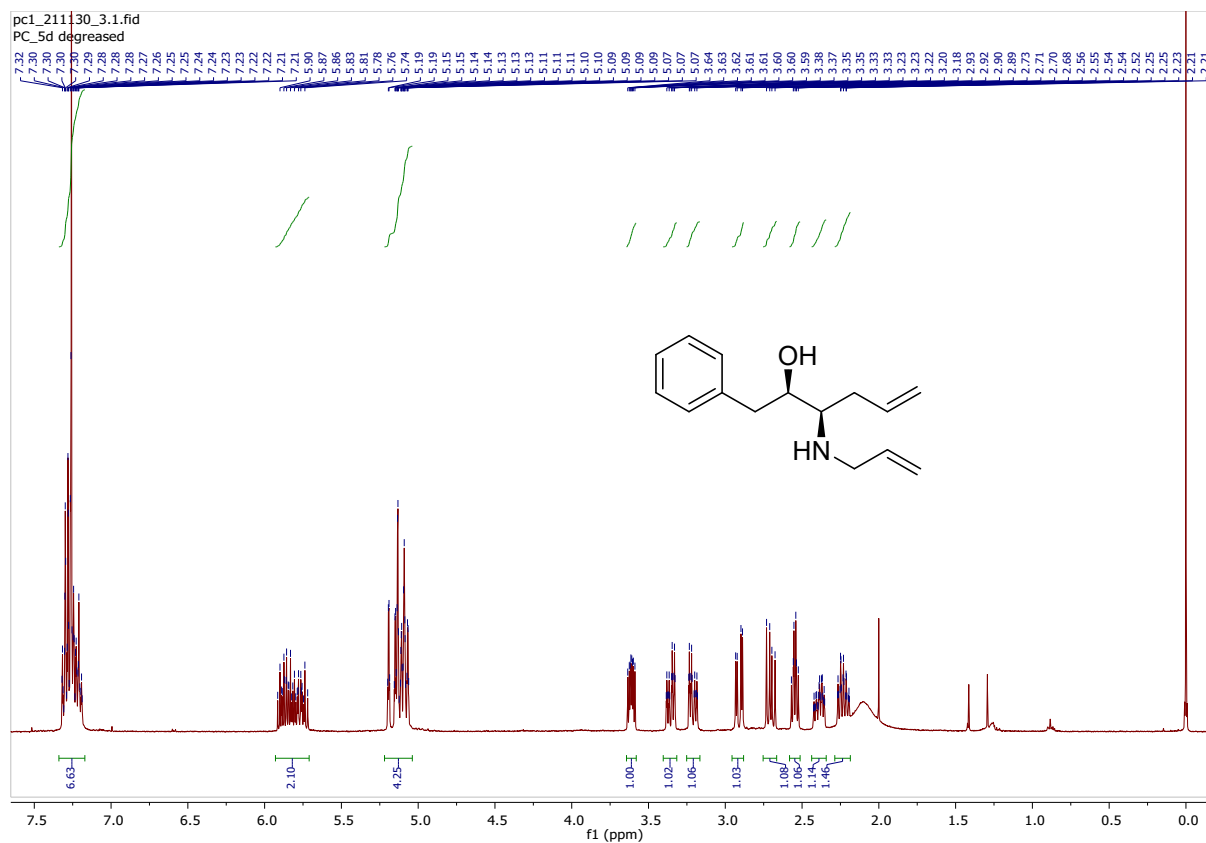

Figure 10.  $^1\text{H}$  NMR spectrum of *rac*-5d (400 MHz,  $\text{CDCl}_3$ , dr = >98:2)

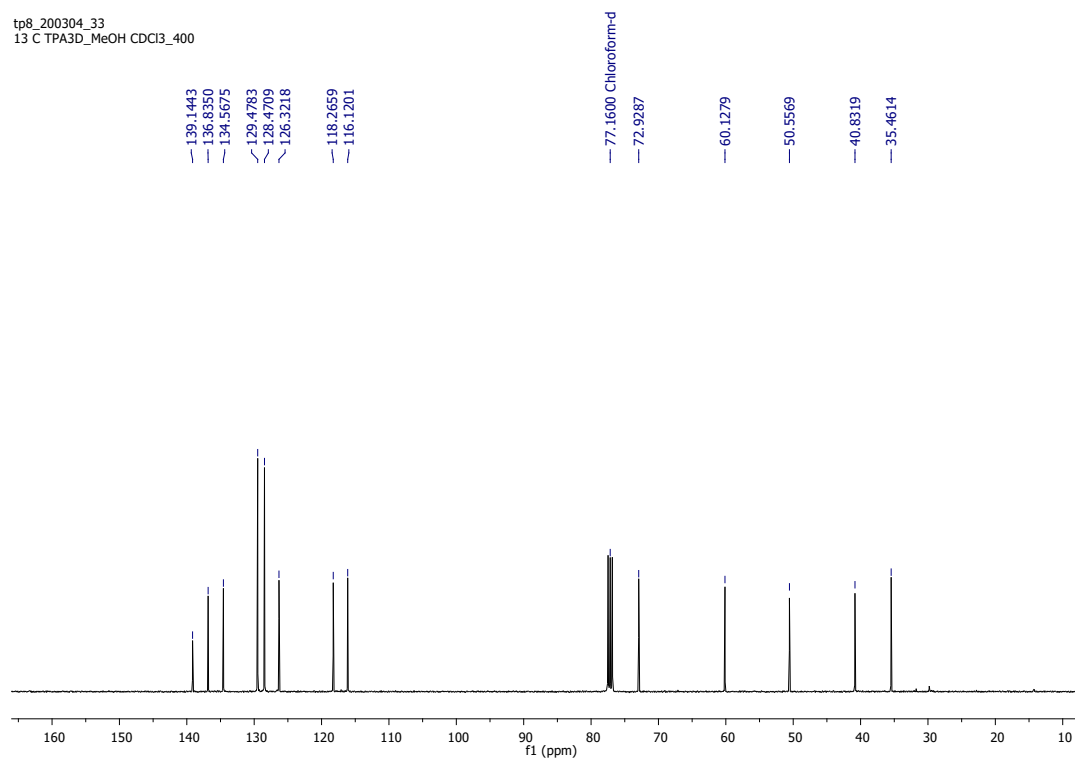

Figure 11.  $^{13}\text{C}$  NMR spectrum of *rac*-5d (100 MHz,  $\text{CDCl}_3$ )

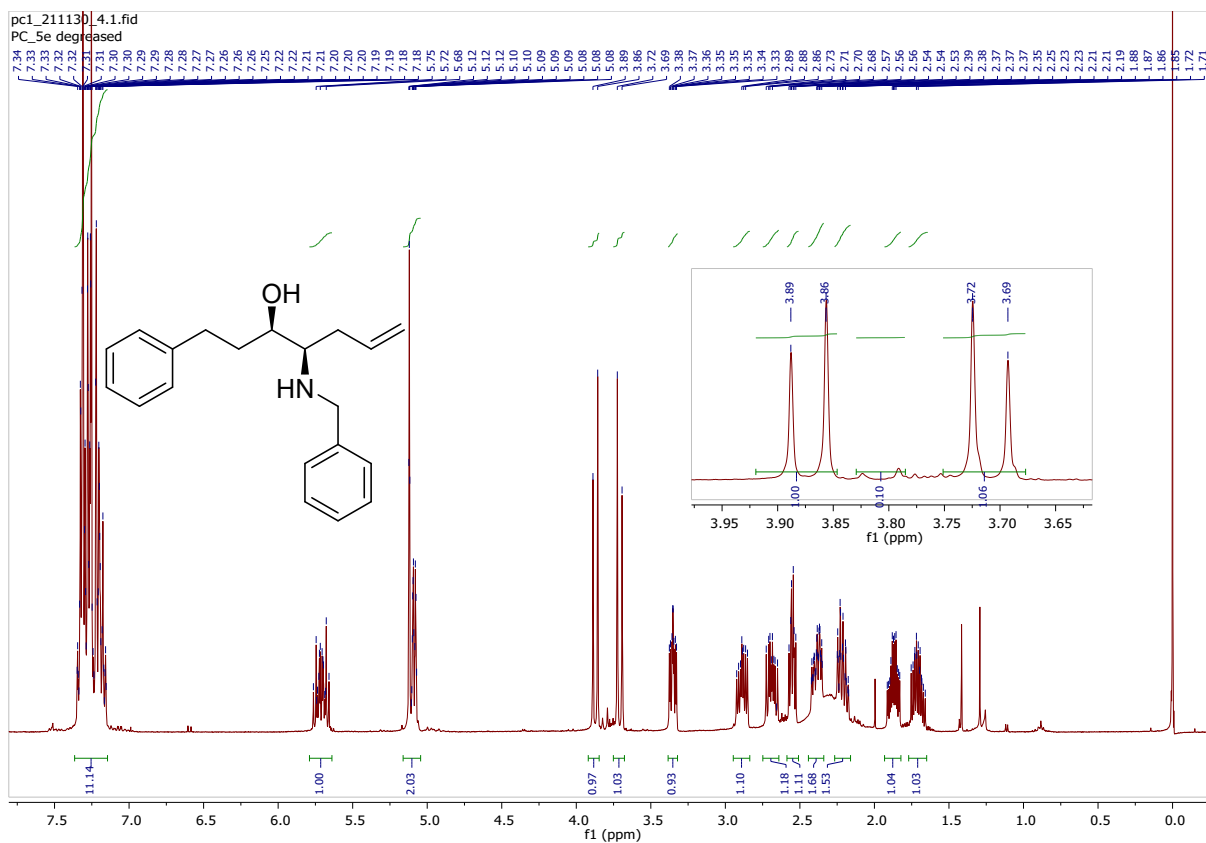

Figure 12.  $^1\text{H}$  NMR spectrum of *rac*-5e (400 MHz,  $\text{CDCl}_3$ , dr = 91:9)

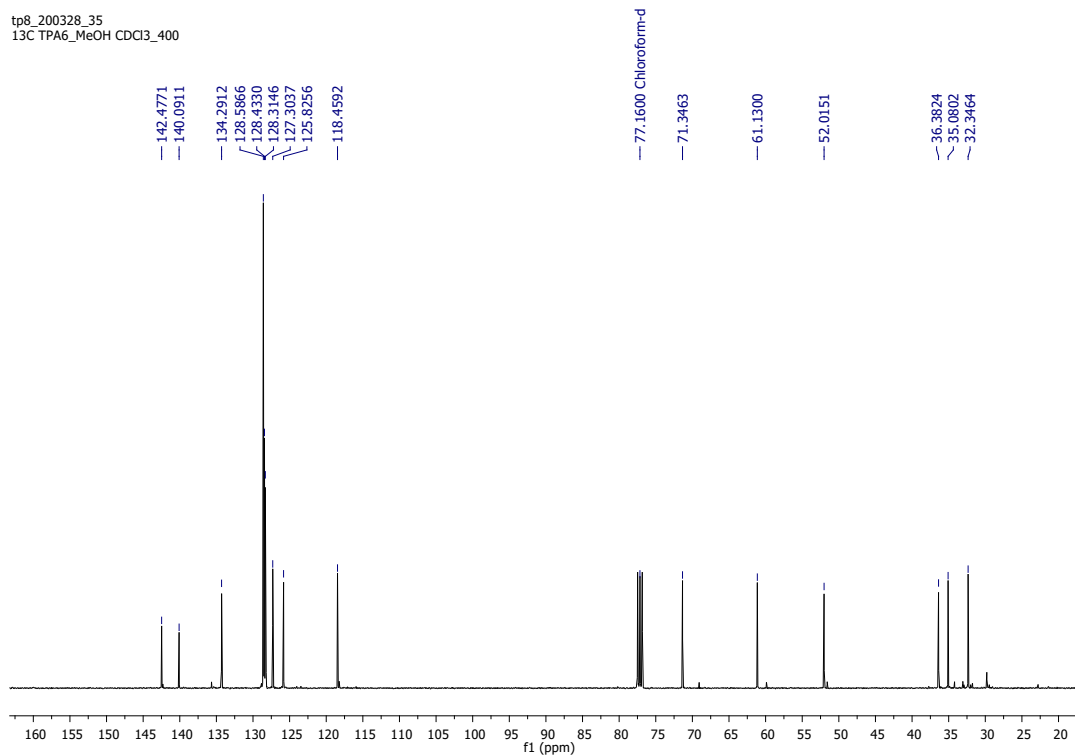

Figure 13.  $^{13}\text{C}$  NMR spectrum of *rac*-5e (101 MHz,  $\text{CDCl}_3$ )

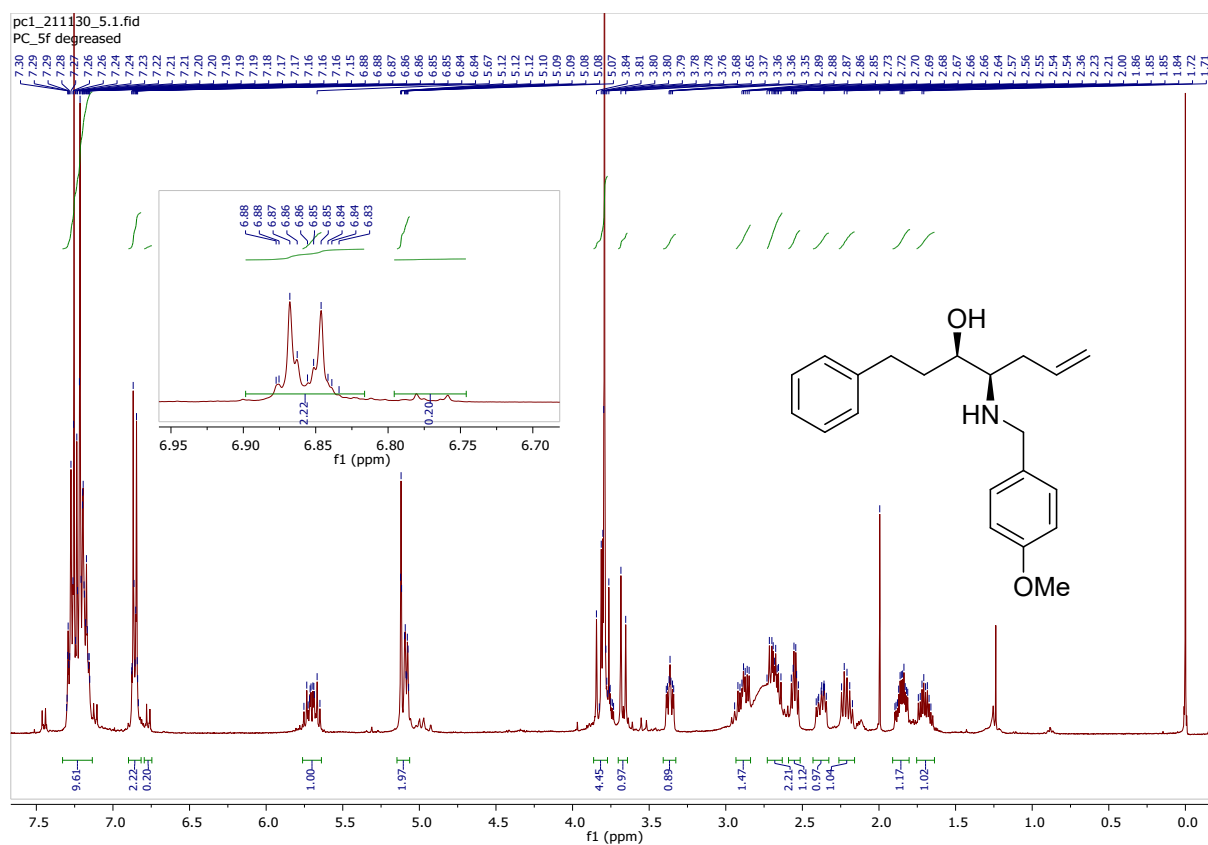

Figure 14.  $^1\text{H}$  NMR spectrum of *rac*-5f (400 MHz,  $\text{CDCl}_3$ , dr = 90:10, trace of acetone)

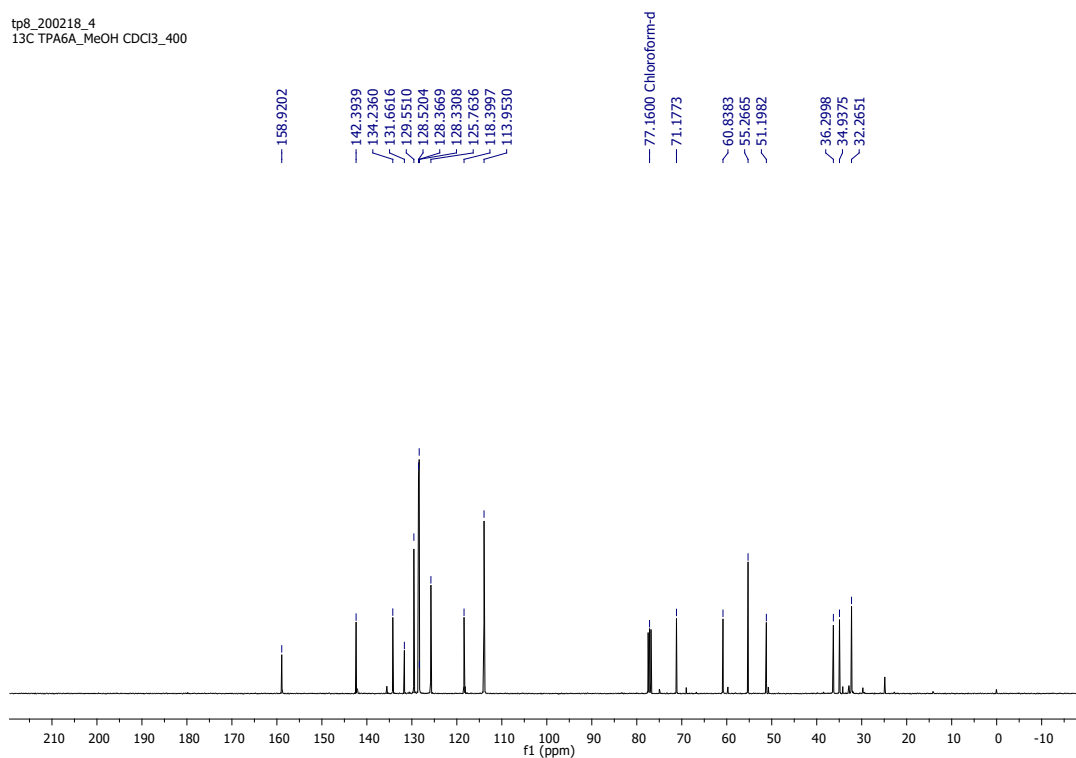

Figure 15.  $^{13}\text{C}$  NMR spectrum of *rac*-5f (101 MHz,  $\text{CDCl}_3$ )

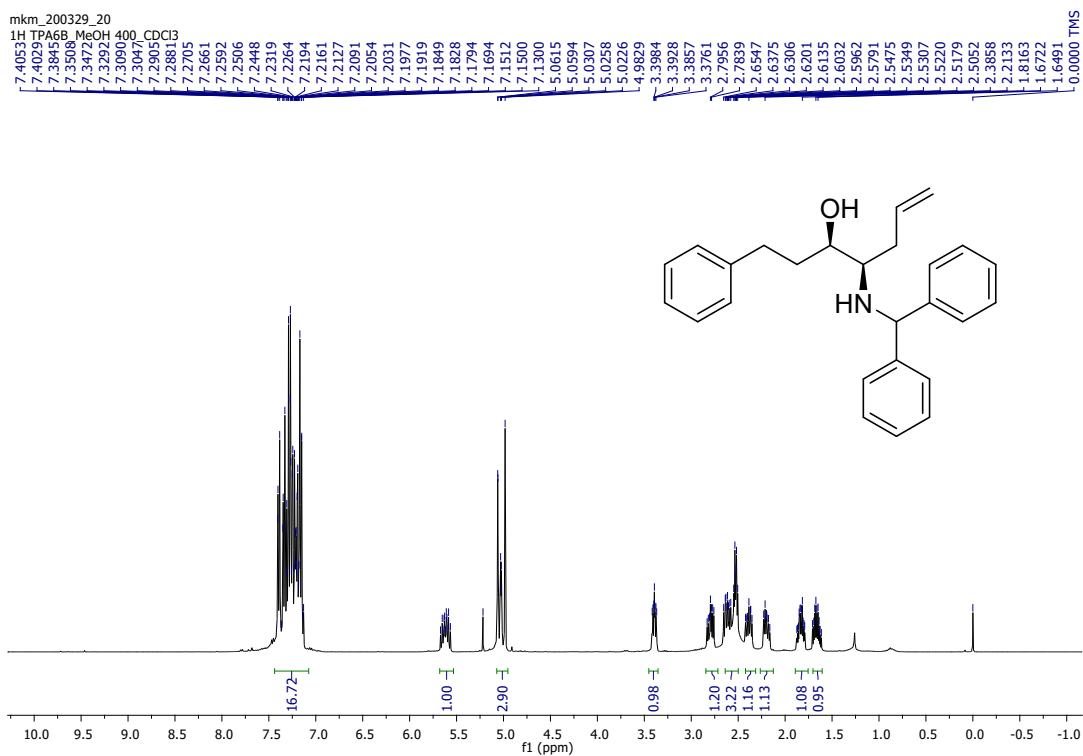

Figure 16. <sup>1</sup>H NMR spectrum of *rac*-5g (400 MHz, CDCl<sub>3</sub>, dr = 95:5)

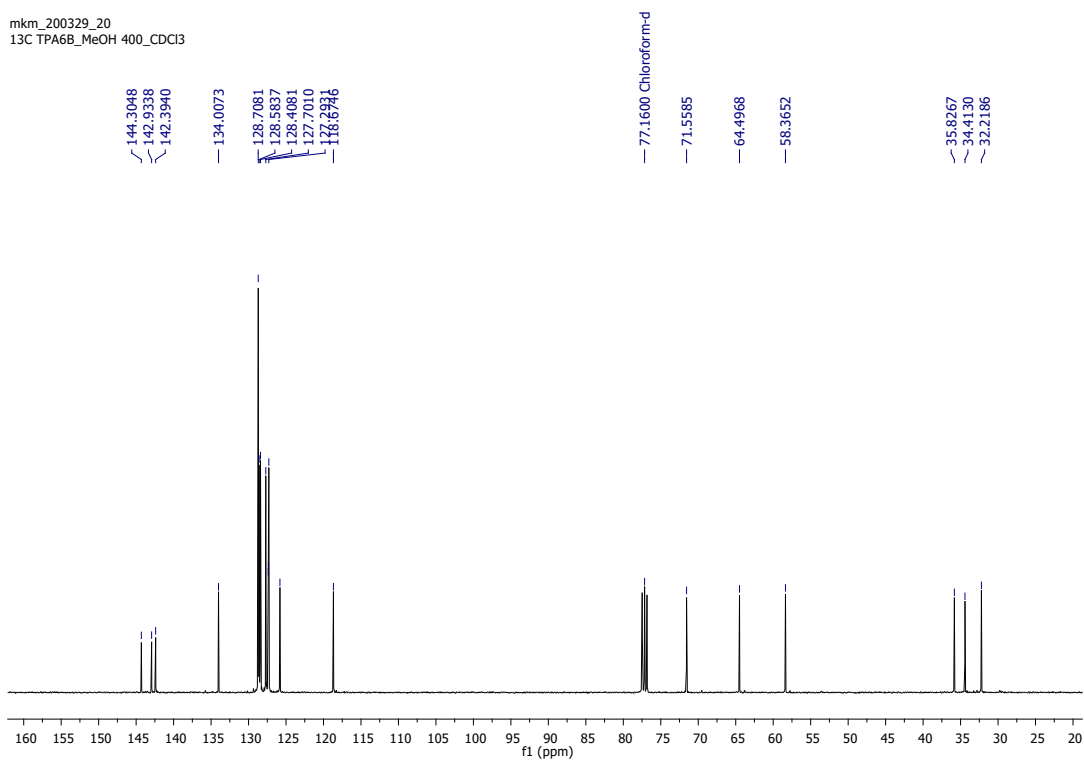

Figure 17. <sup>13</sup>C NMR spectrum of *rac*-5g (101 MHz, CDCl<sub>3</sub>)

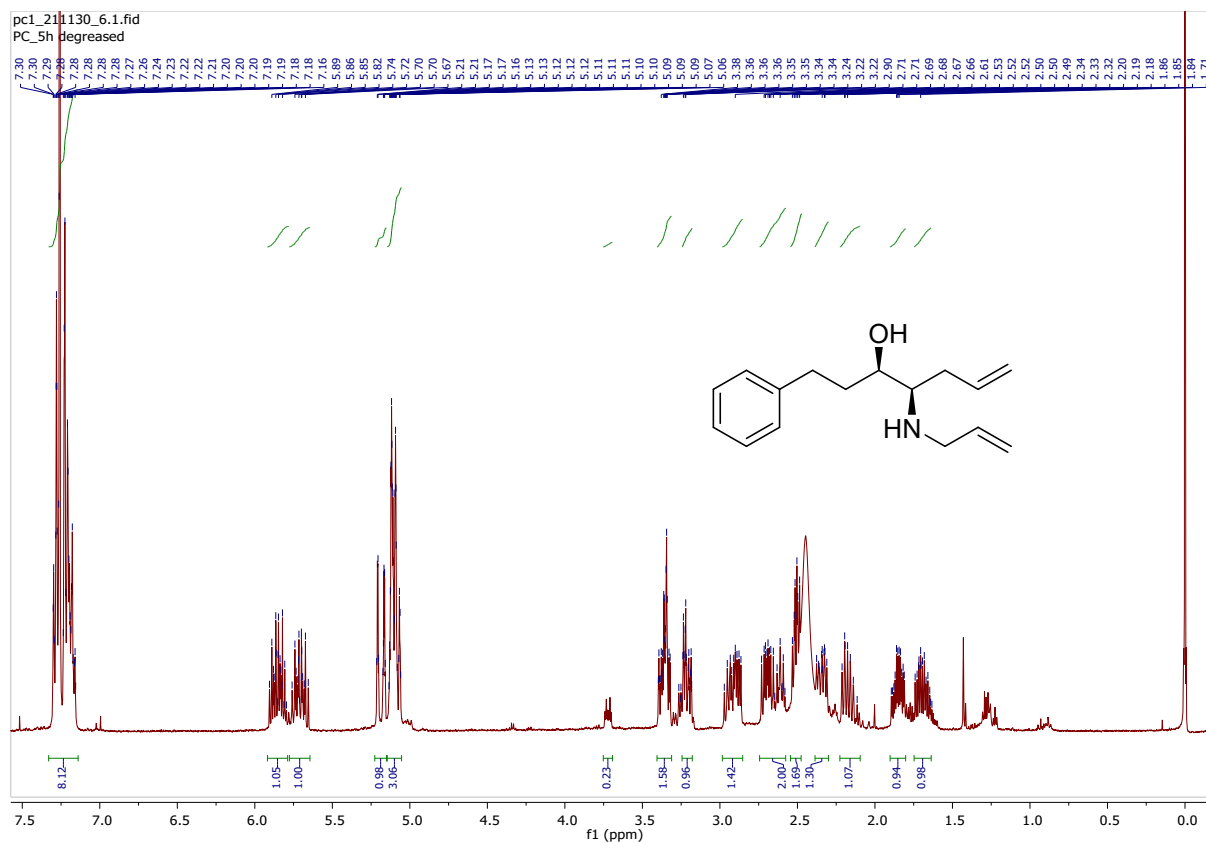

Figure 18.  $^1\text{H}$  NMR spectrum of *rac*-5h (400 MHz,  $\text{CDCl}_3$ , dr = 81:19)

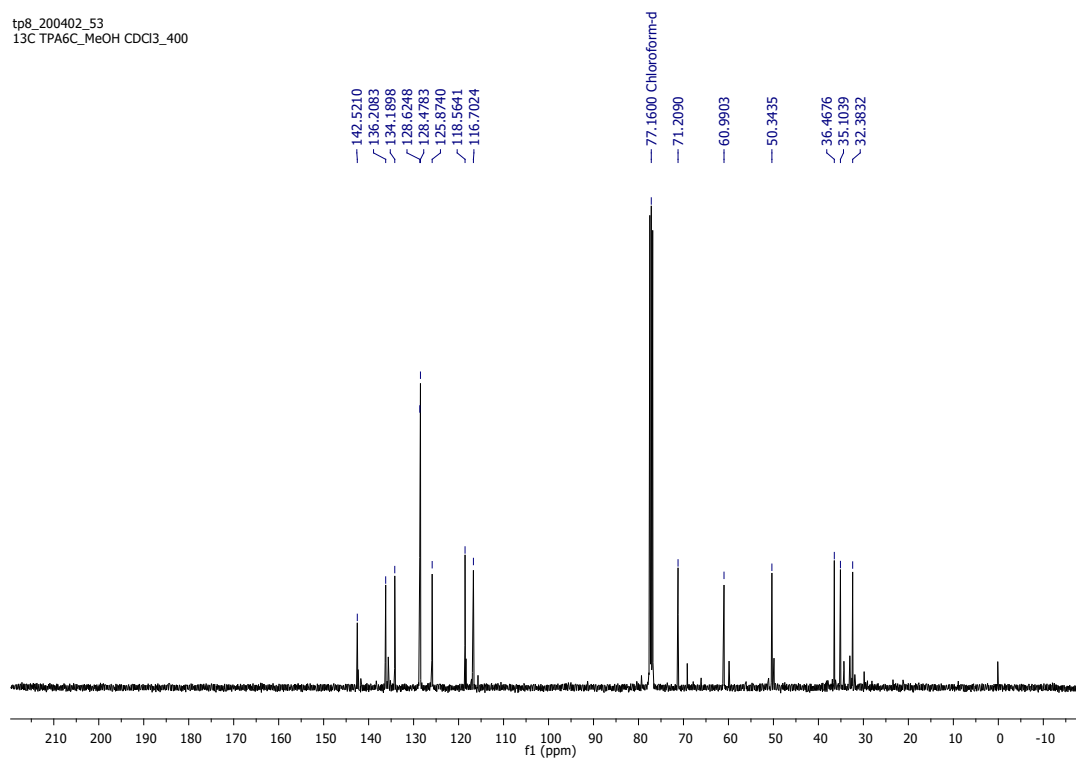

Figure 19.  $^{13}\text{C}$  NMR spectrum of *rac*-5h (101 MHz,  $\text{CDCl}_3$ )

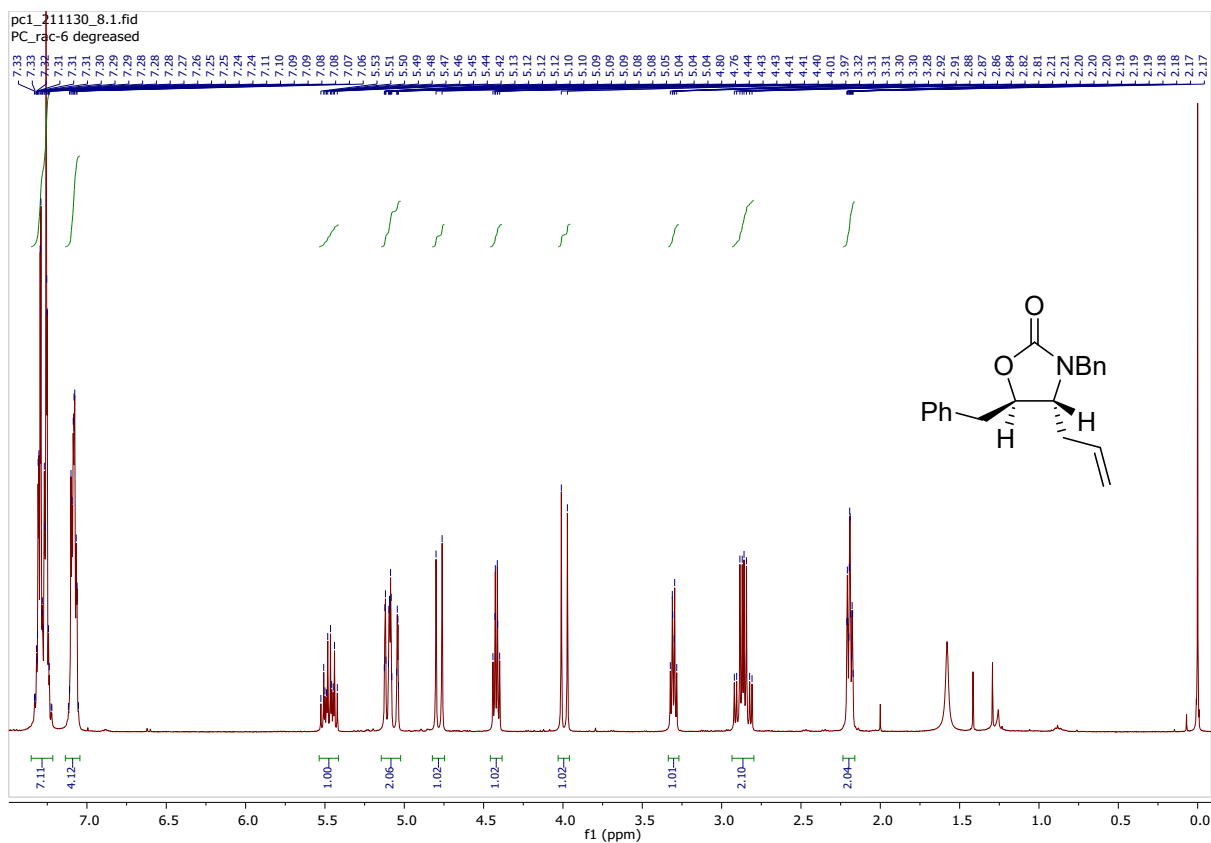

Figure 20.  $^1\text{H}$  NMR spectrum of *rac*-6 (400 MHz,  $\text{CDCl}_3$ )

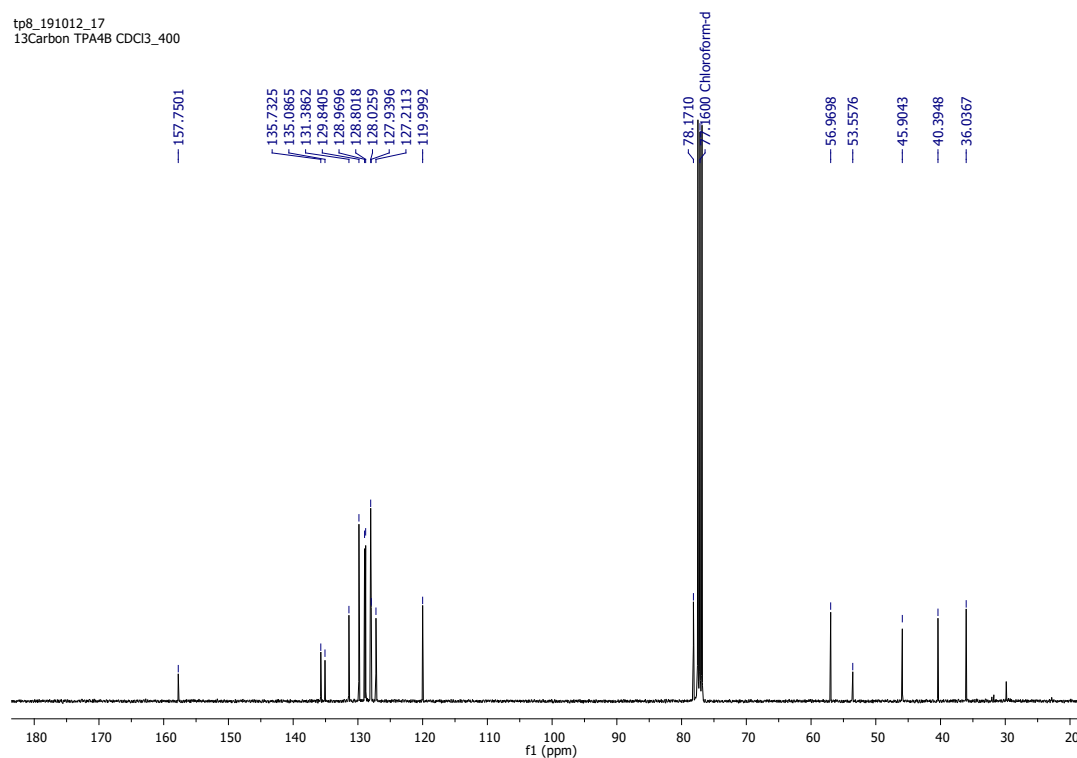

Figure 21.  $^{13}\text{C}$  NMR spectrum of *rac*-6 (101 MHz,  $\text{CDCl}_3$ )

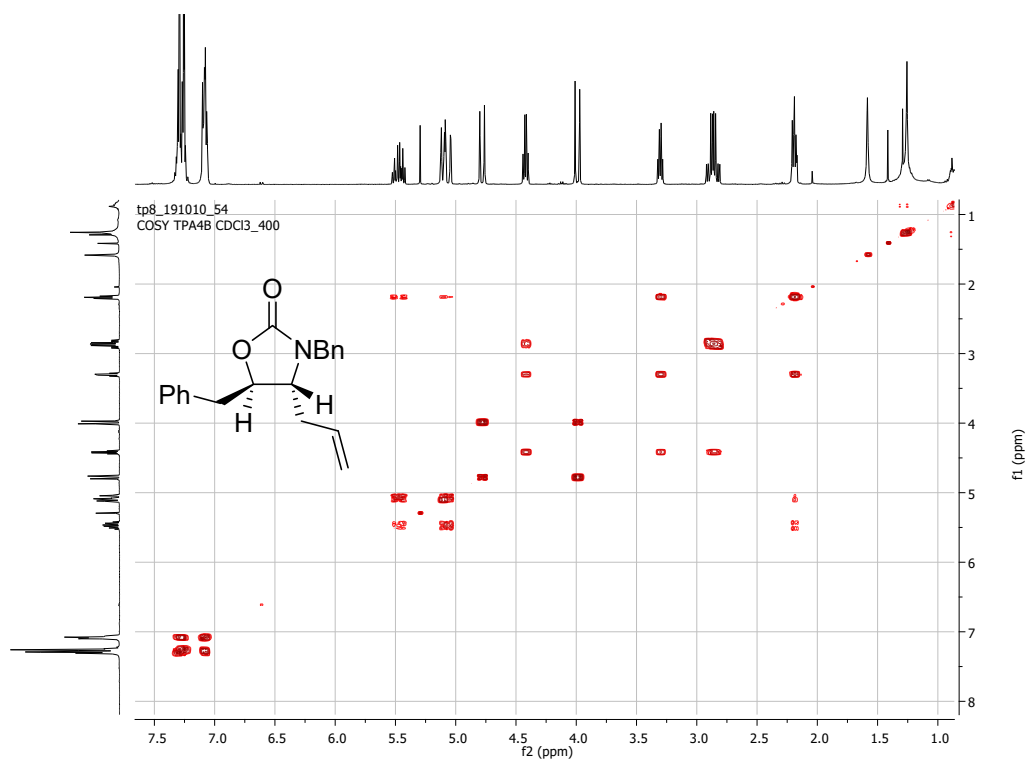

Figure 22. COSY spectrum of *rac-6*

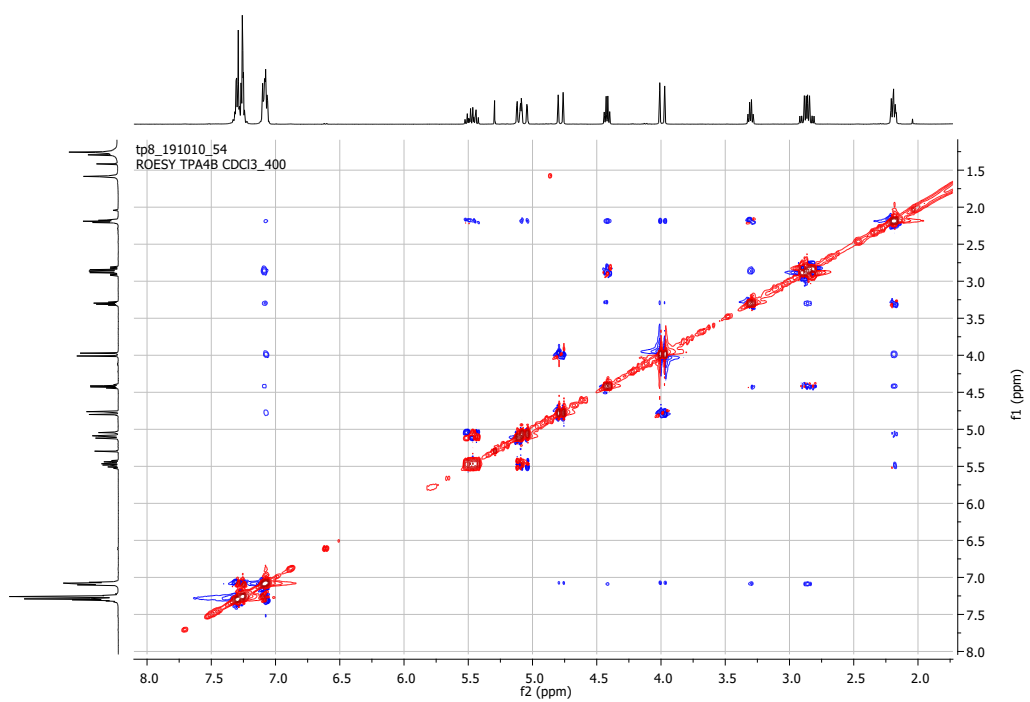

Figure 23. ROESY spectrum of *rac-6*

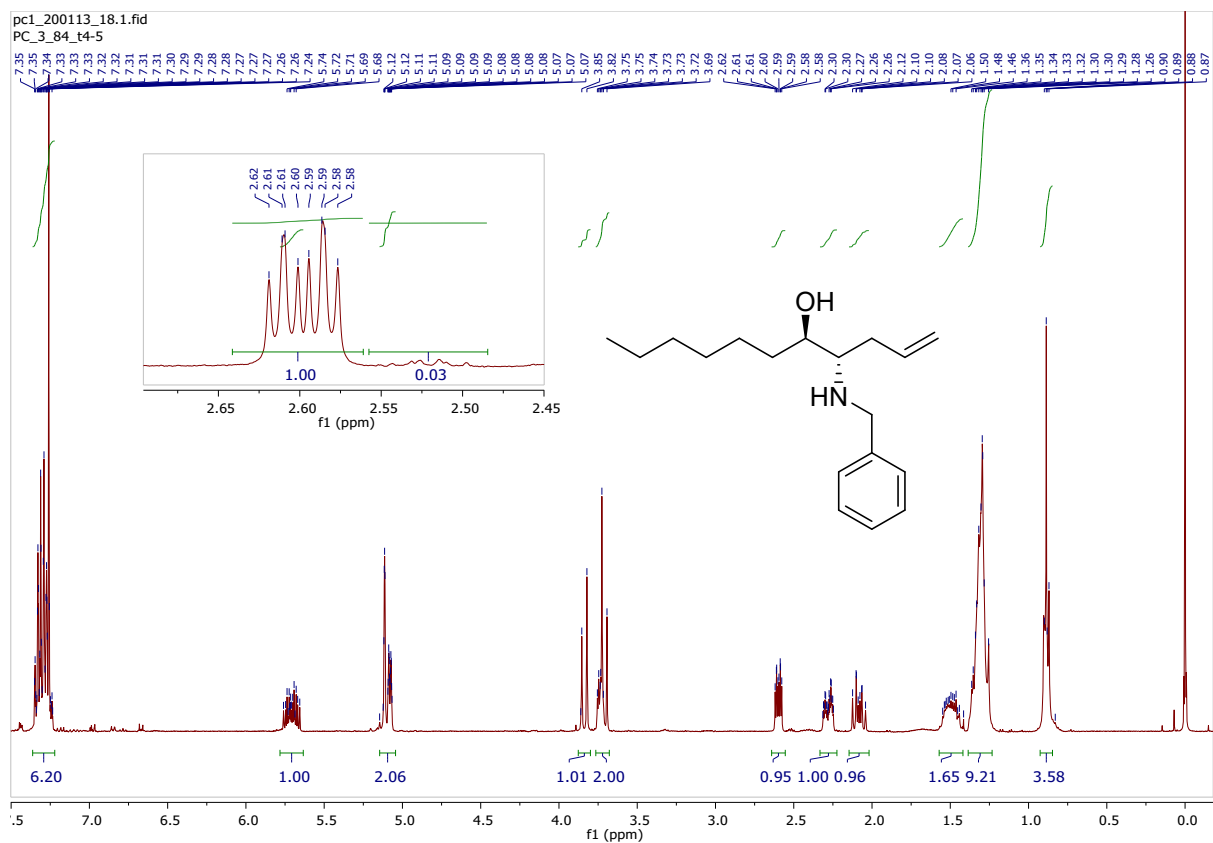

Figure 24:  $^1\text{H}$  NMR spectrum of **7a** (400 MHz,  $\text{CDCl}_3$ , dr = 97:3).

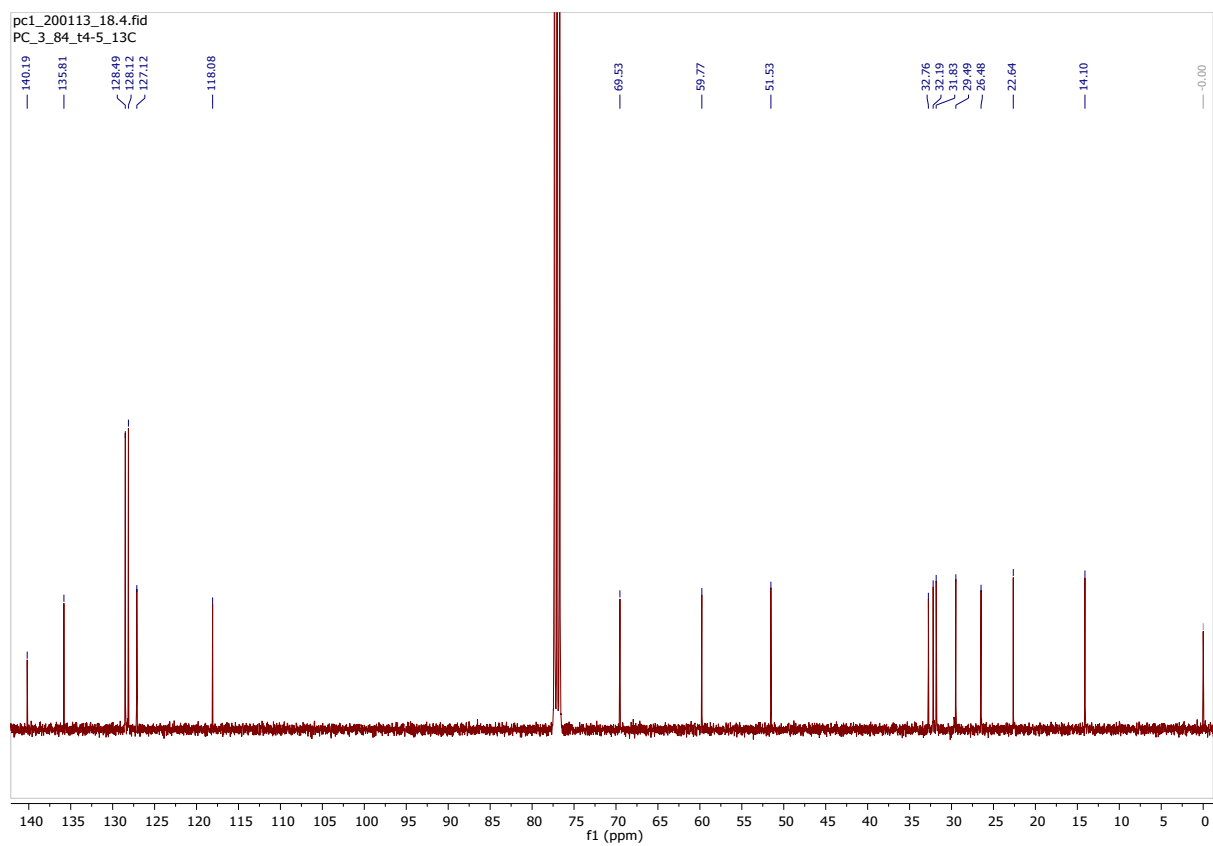

Figure 25:  $^{13}\text{C}$  NMR spectrum of **7a** (101 MHz,  $\text{CDCl}_3$ ).



Chromatogram  
PC\_4\_62\_2.lcd  
mAU

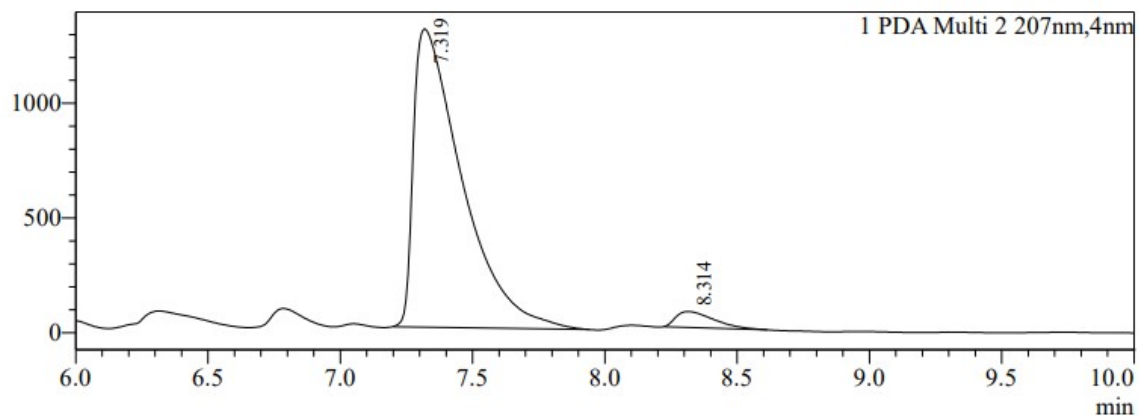

Peak Table  
PDA Ch2 207nm

| Peak# | Ret. Time | Area%   | Name |
|-------|-----------|---------|------|
| 1     | 7.319     | 96.017  |      |
| 2     | 8.314     | 3.983   |      |
| Total |           | 100.000 |      |

**Figure 26:** Chiral HPLC trace of **7a**.

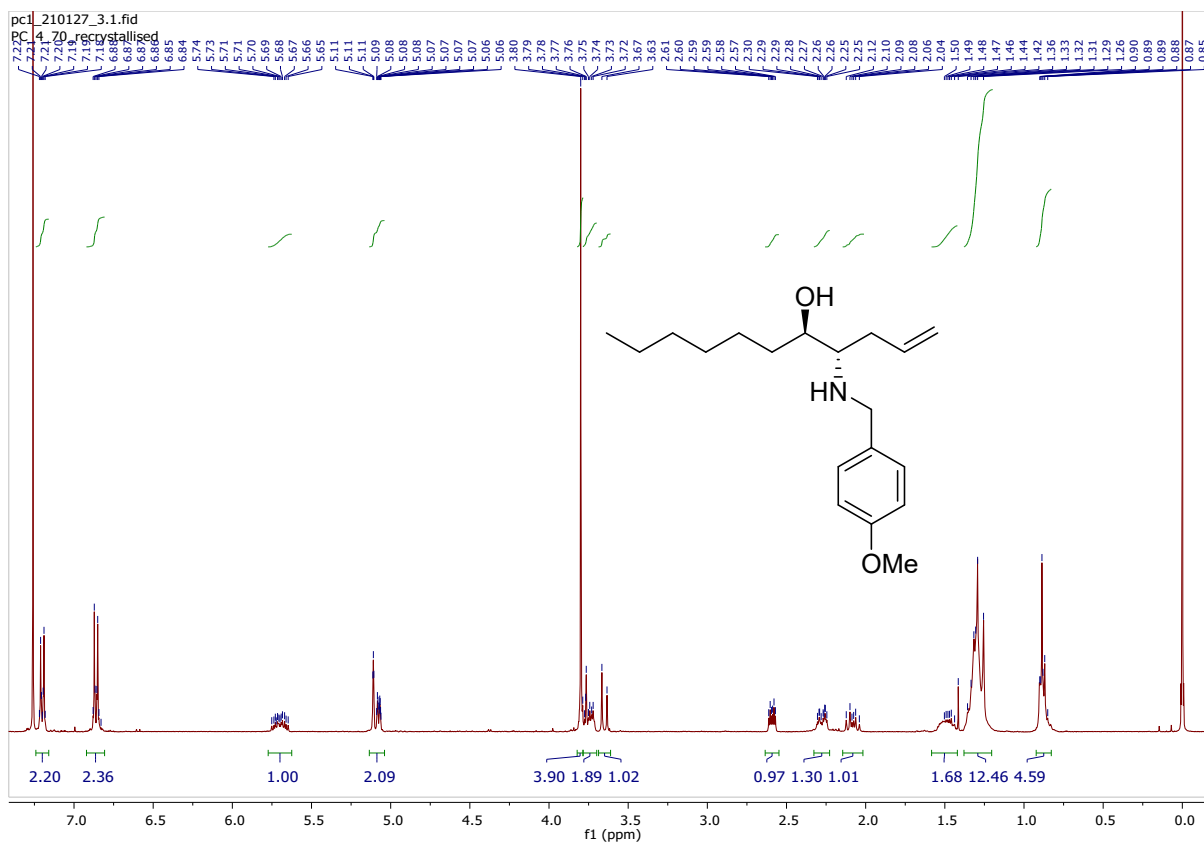

Figure 27:  $^1\text{H}$  NMR spectrum of **7b** (400 MHz,  $\text{CDCl}_3$ ).

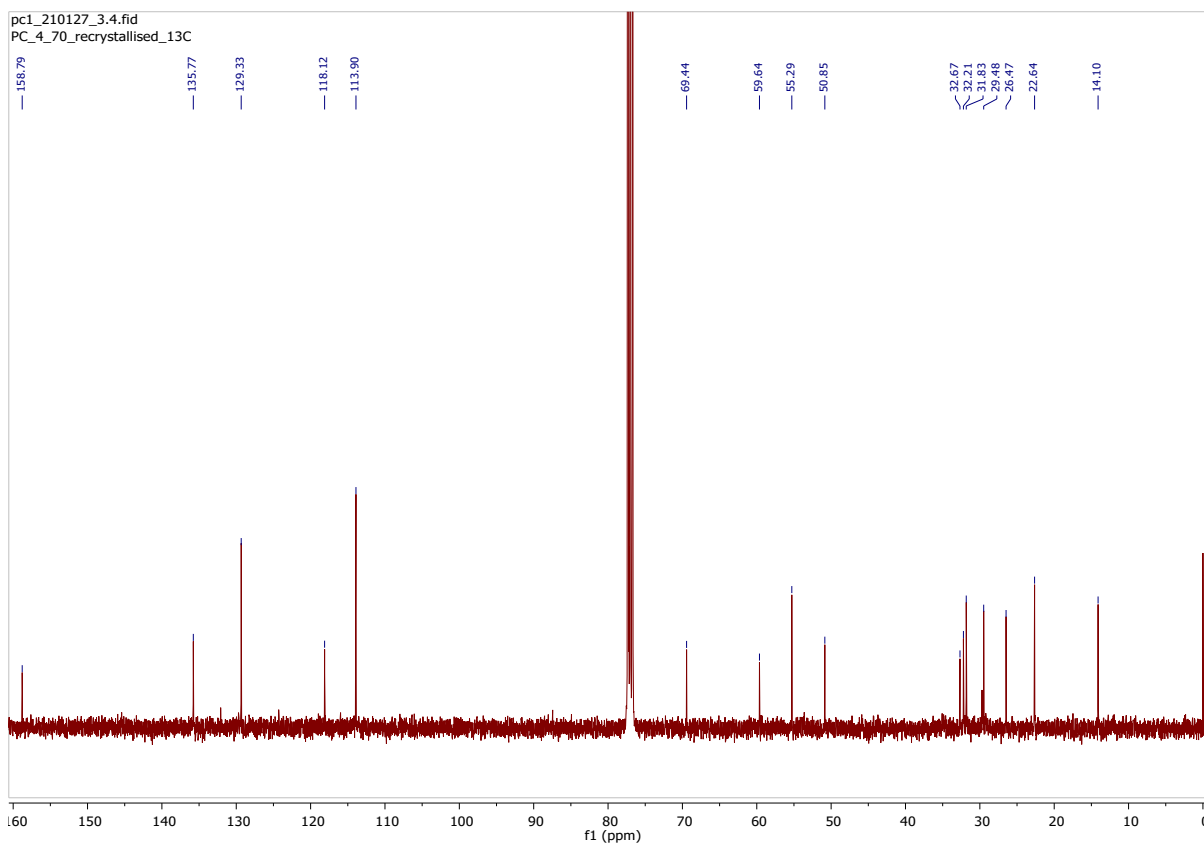

Figure 28:  $^{13}\text{C}$  NMR spectrum of **7b** (101 MHz,  $\text{CDCl}_3$ ).

Chromatogram  
PC\_4\_70\_4.lcd  
mAU

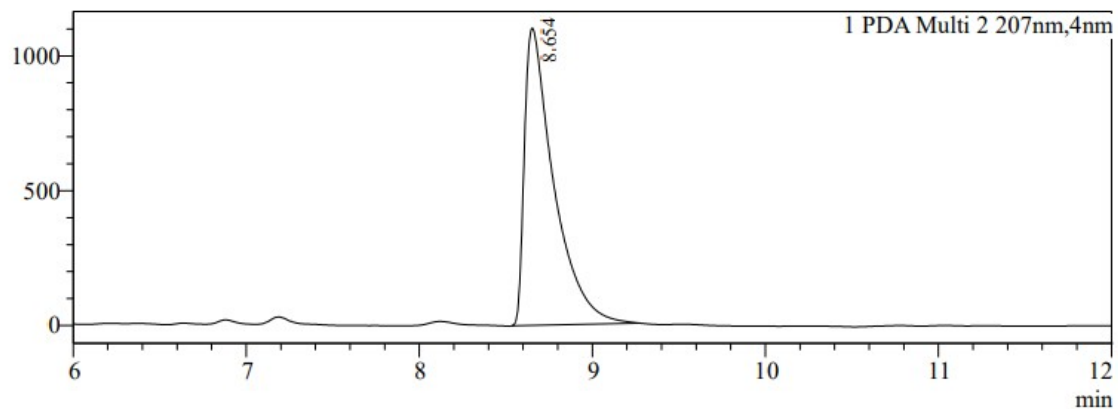

Peak Table  
PDA Ch2 207nm

| Peak# | Ret. Time | Area%   | Name |
|-------|-----------|---------|------|
| 1     | 8.654     | 100.000 |      |
| Total |           | 100.000 |      |

**Figure 29:** Chiral HPLC trace of **7b**.

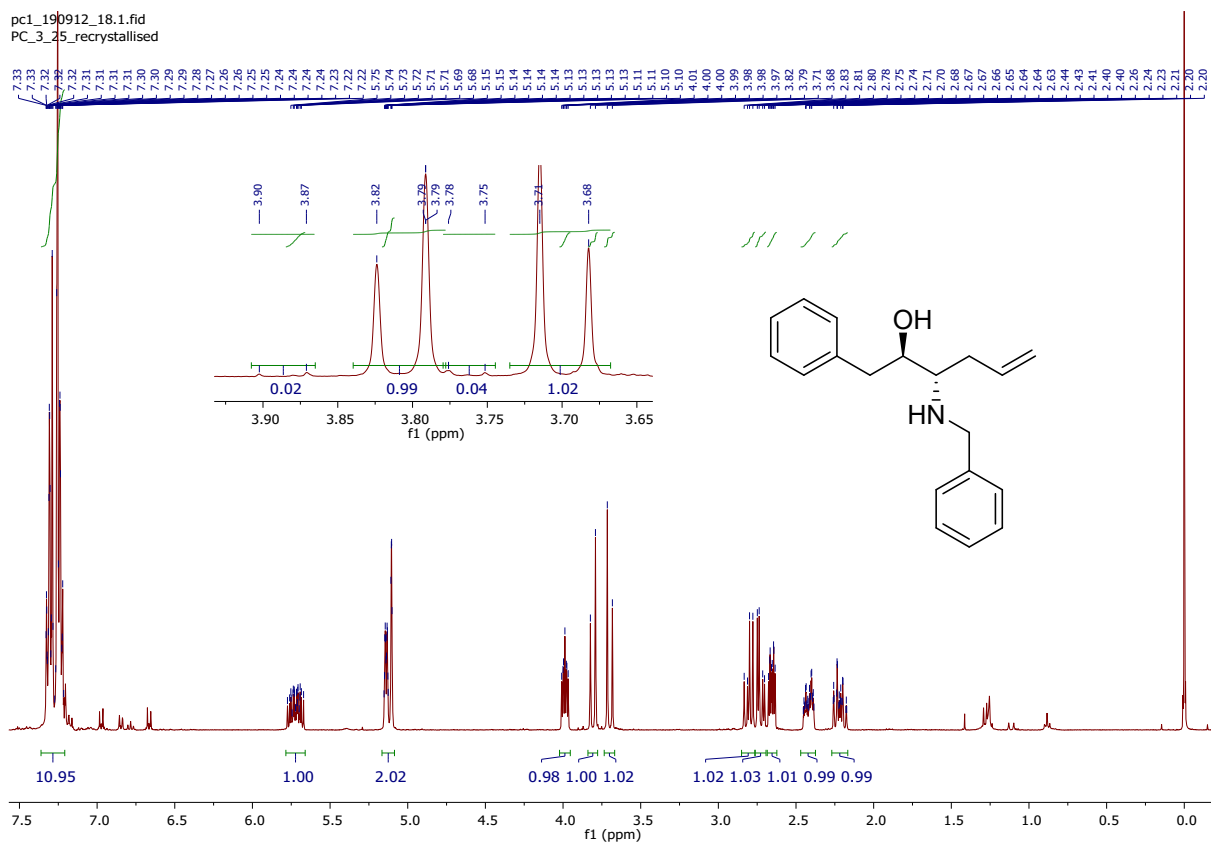

Figure 30:  $^1\text{H}$  NMR spectrum of 7c (400 MHz,  $\text{CDCl}_3$ , recrystallised dr = 97:3).

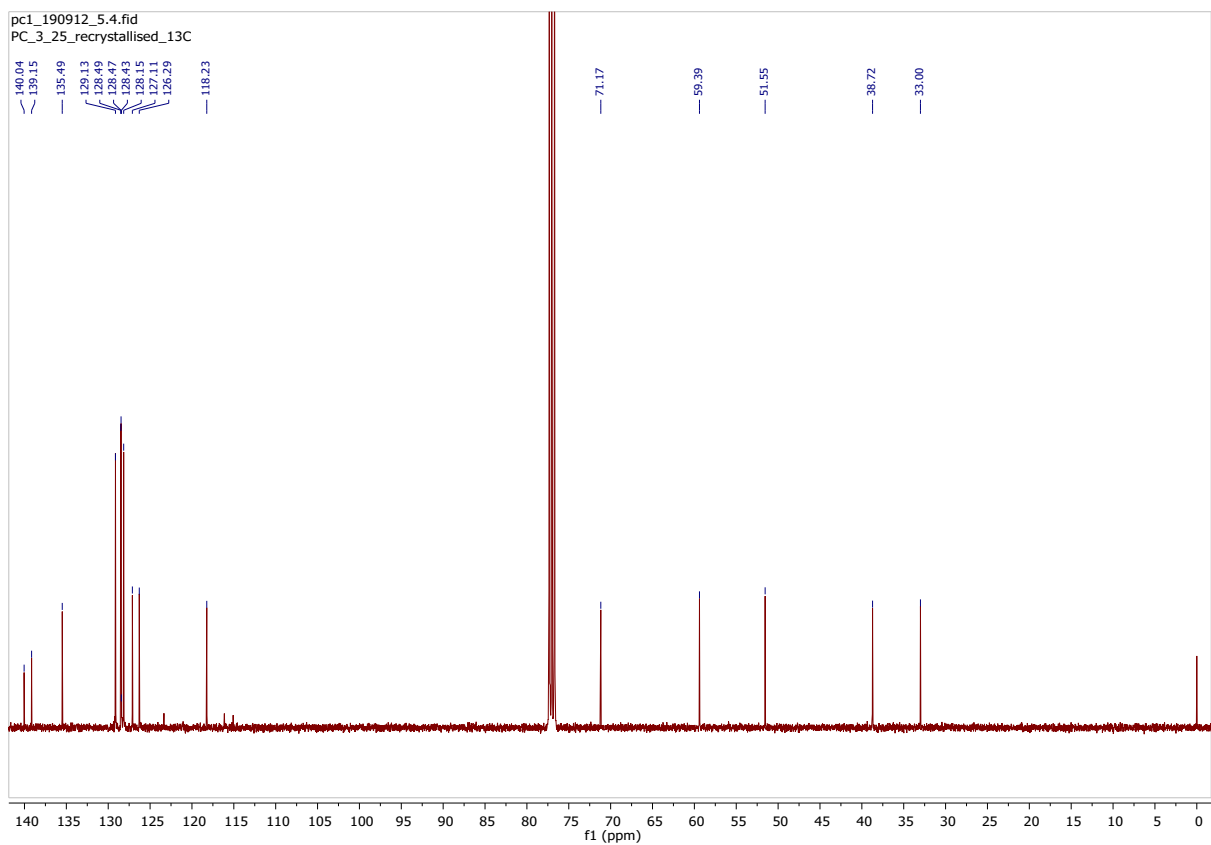

Figure 31:  $^{13}\text{C}$  NMR spectrum of 7c (101 MHz,  $\text{CDCl}_3$ ).

Chromatogram  
 Racemic sample 46.lcd  
 mAU

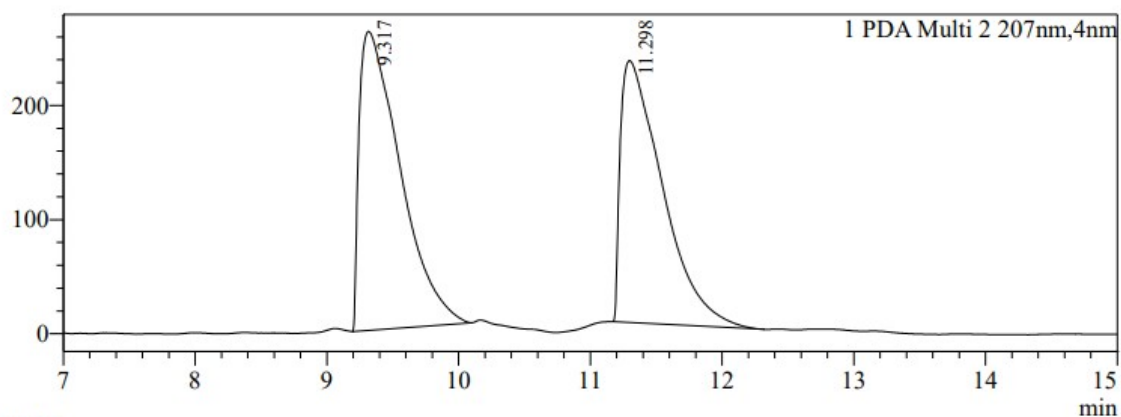

Peak Table  
 PDA Ch2 207nm

| Peak# | Ret. Time | Area%   | Name |
|-------|-----------|---------|------|
| 1     | 9.317     | 52.606  |      |
| 2     | 11.298    | 47.394  |      |
| Total |           | 100.000 |      |

**Figure 32:** Chiral HPLC trace of nearly racemic **7c** (made by mixing D- and L-proline)

Chromatogram  
 PC 4\_90\_2.lcd  
 mAU

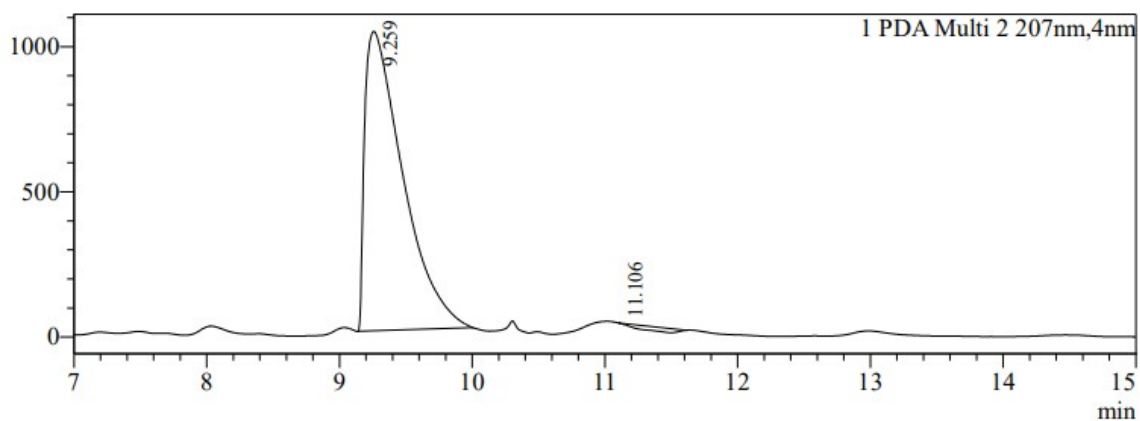

Peak Table  
 PDA Ch2 207nm

| Peak# | Ret. Time | Area%   | Name |
|-------|-----------|---------|------|
| 1     | 9.259     | 101.612 |      |
| 2     | 11.106    | -1.612  |      |
| Total |           | 100.000 |      |

**Figure 33:** Chiral HPLC trace of **7c**.

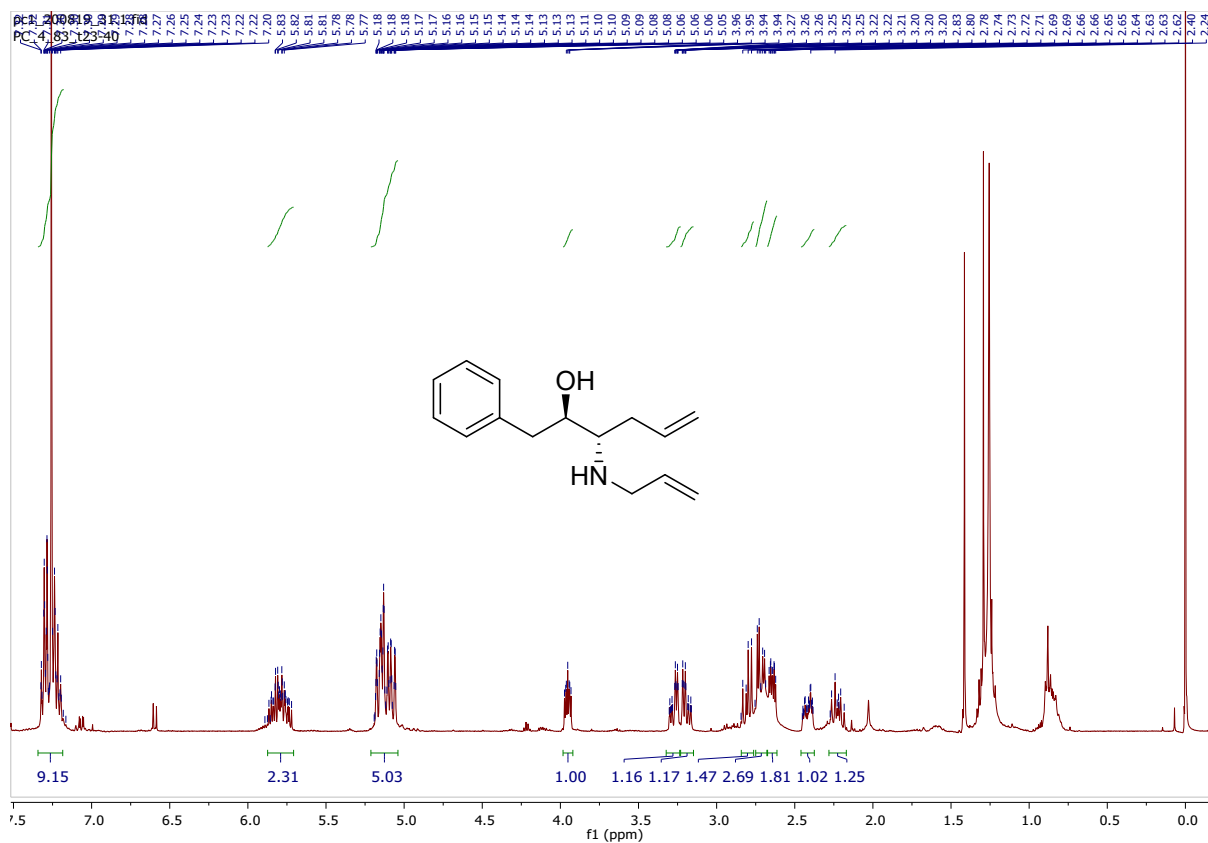

**Figure 34:**  $^1\text{H}$  NMR spectrum of **7d** (400 MHz,  $\text{CDCl}_3$ , dr = 92:8 with impurities (grease)).

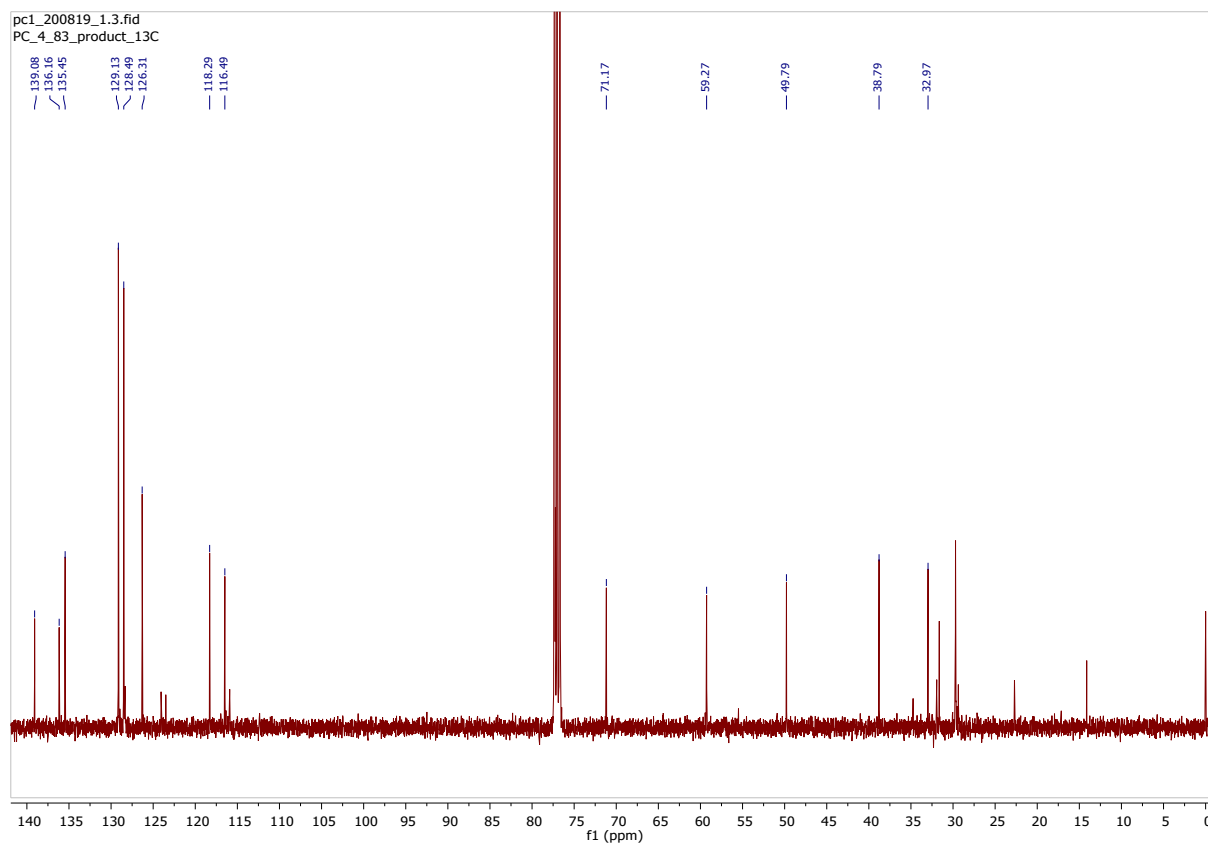

**Figure 35:**  $^{13}\text{C}$  NMR spectrum of **7d** (101 MHz,  $\text{CDCl}_3$ ).

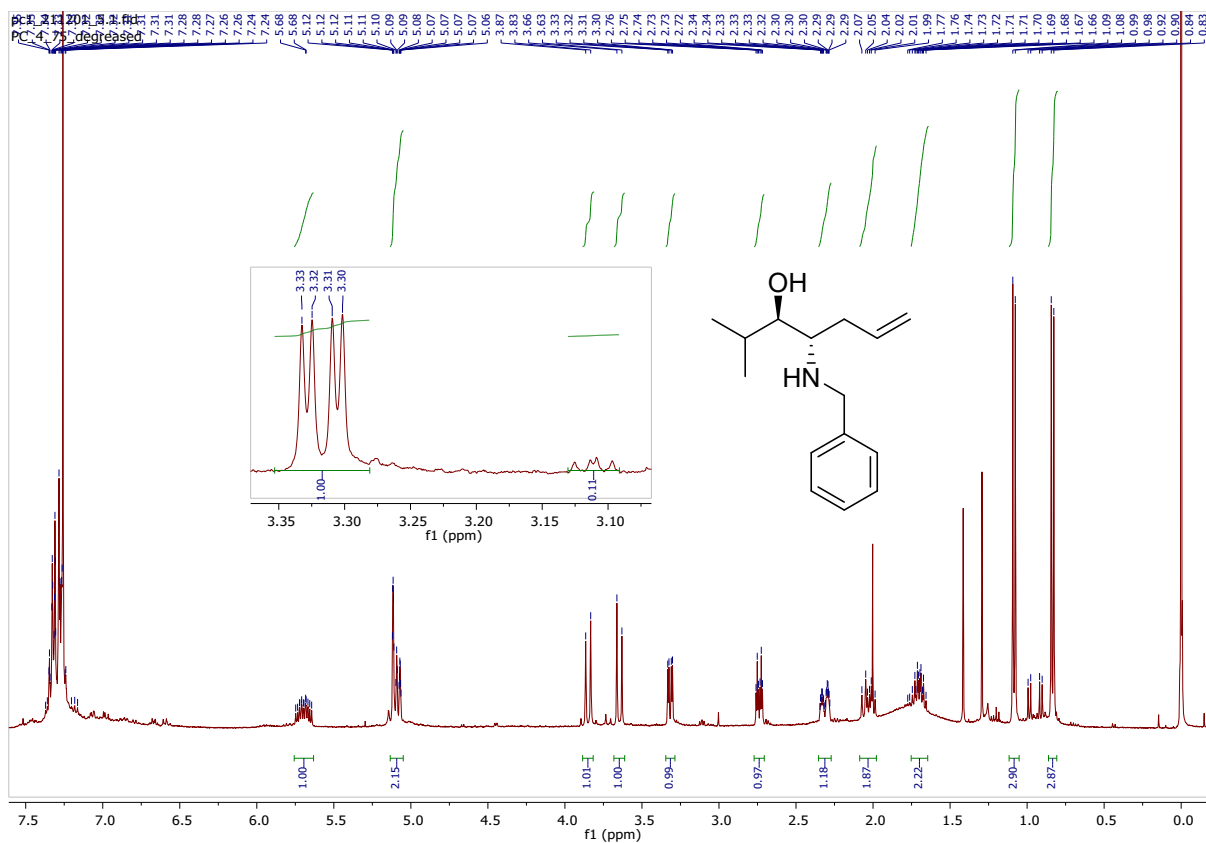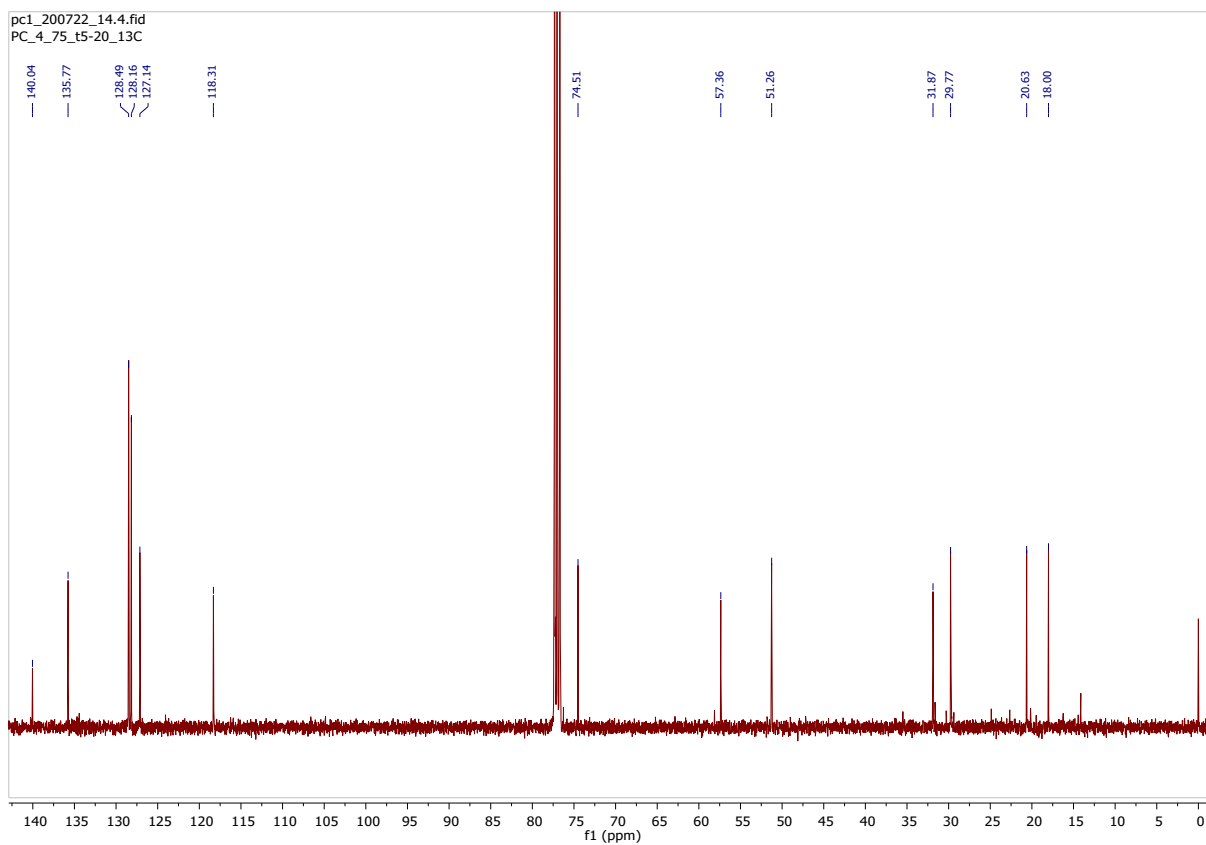

Chromatogram  
PC\_4\_75\_2.lcd  
mAU

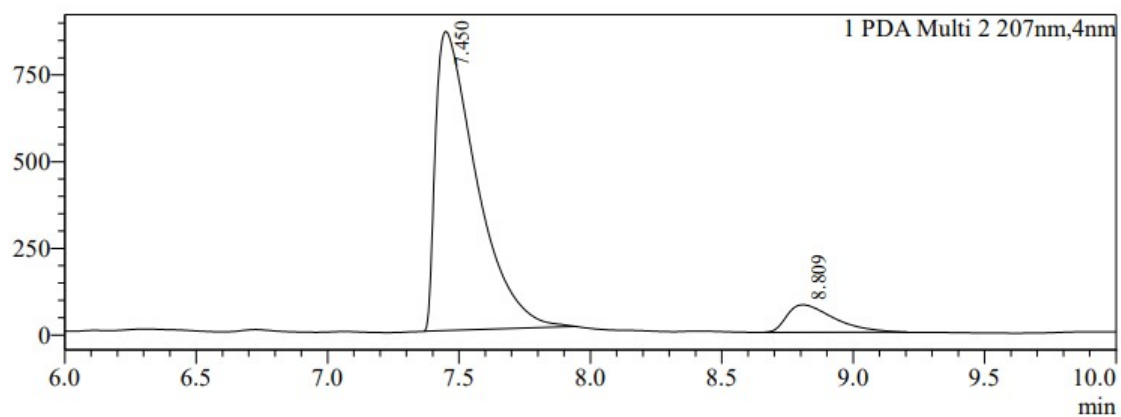

Peak Table  
PDA Ch2 207nm

| Peak# | Ret. Time | Area%   | Name |
|-------|-----------|---------|------|
| 1     | 7.450     | 90.474  |      |
| 2     | 8.809     | 9.526   |      |
| Total |           | 100.000 |      |

**Figure 38:** Chiral HPLC trace of 7e.



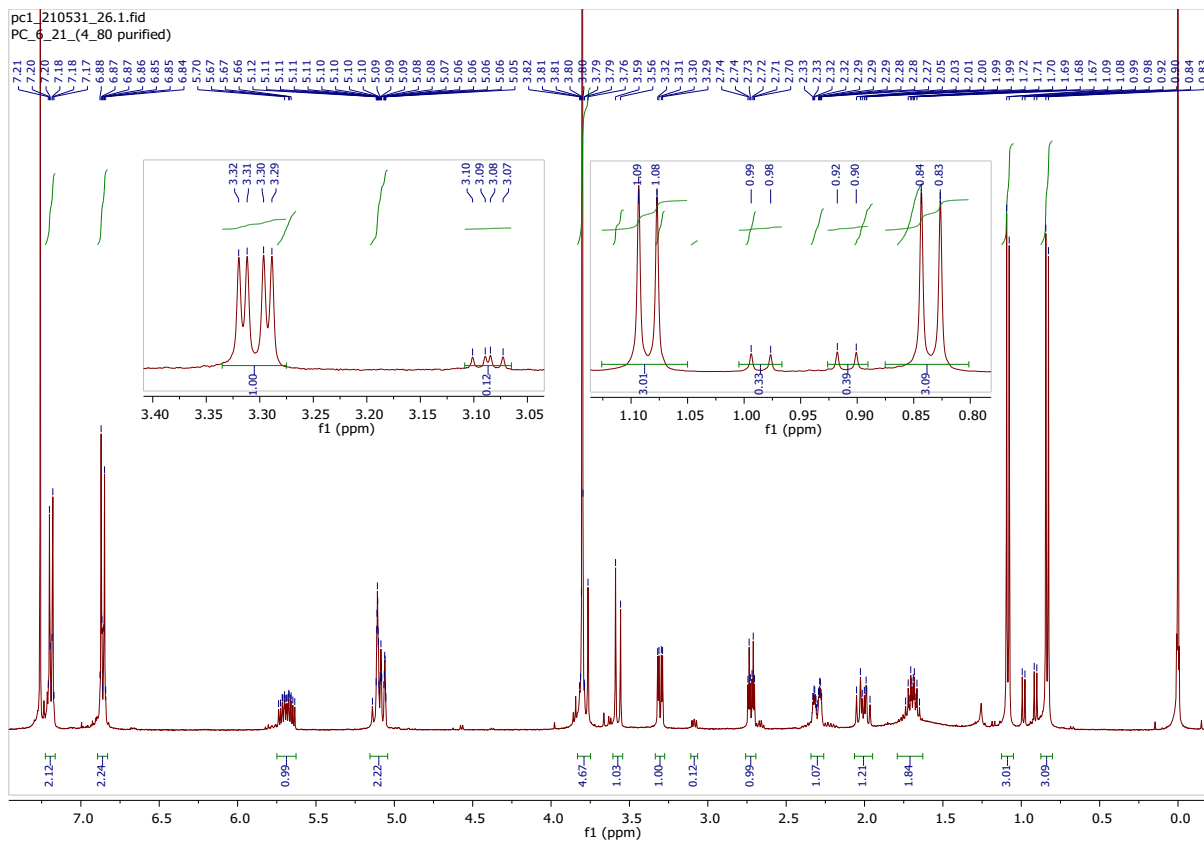

Figure 39:  $^1\text{H}$  NMR spectrum of **7f** (400 MHz,  $\text{CDCl}_3$ , dr = 88:12).

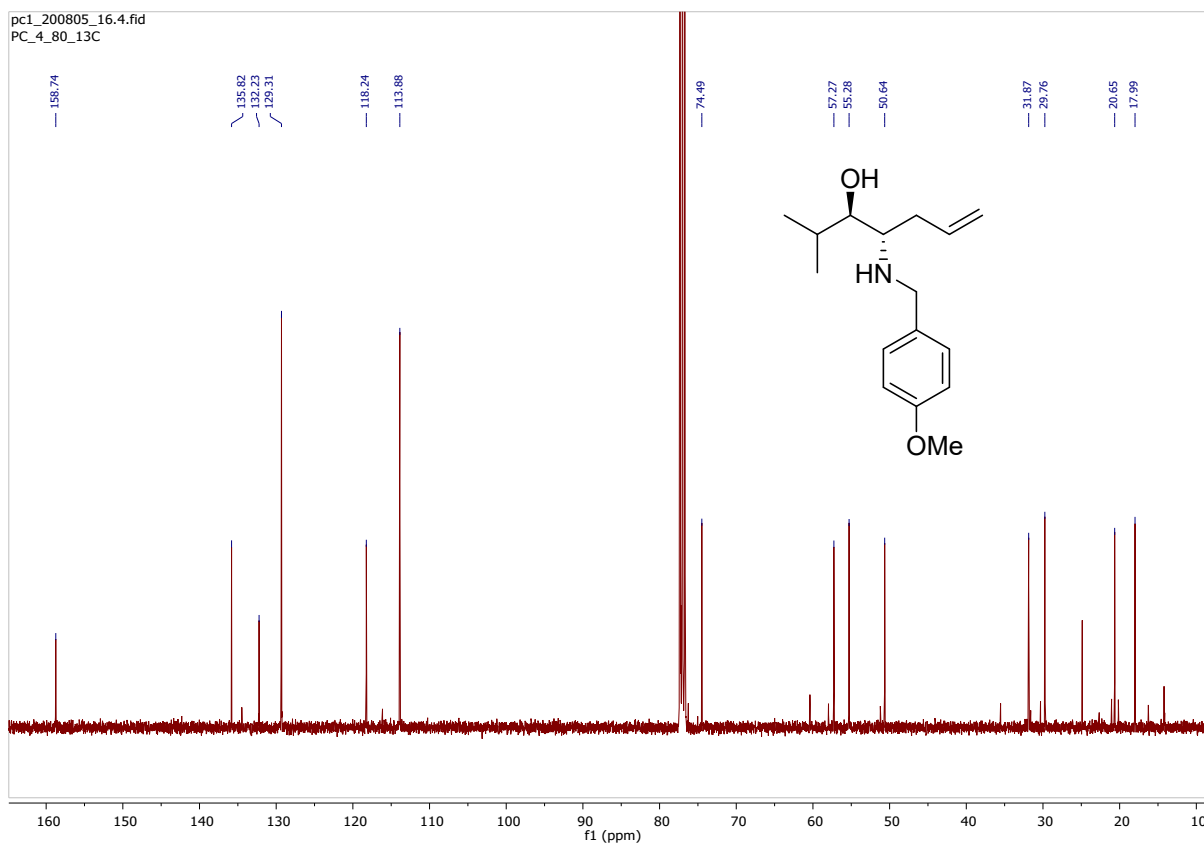

Figure 40:  $^{13}\text{C}$  NMR spectrum of **7f** (101 MHz,  $\text{CDCl}_3$ ).

Chromatogram  
PC\_4\_80\_1.lcd  
mAU

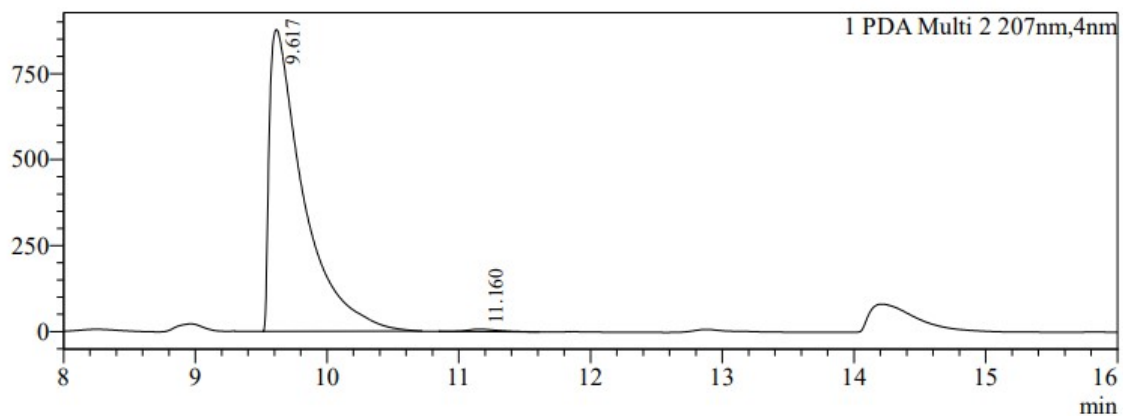

Peak Table  
PDA Ch2 207nm

| Peak# | Ret. Time | Area%   | Name |
|-------|-----------|---------|------|
| 1     | 9.617     | 99.204  |      |
| 2     | 11.160    | 0.796   |      |
| Total |           | 100.000 |      |

**Figure 41:** Chiral HPLC trace of **7f**. The peak at  $R_t \sim 14.2$  min is the *syn*-diastereomer.

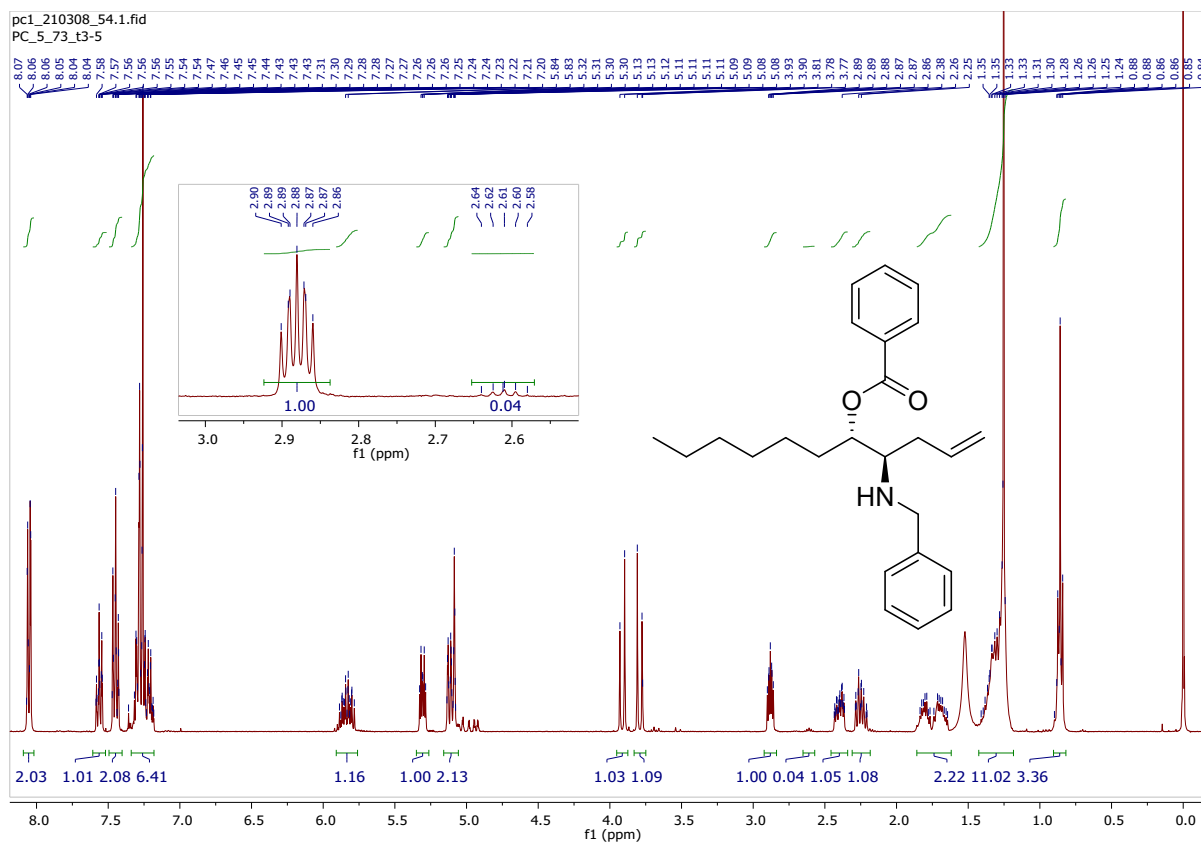

Figure 42:  $^1\text{H}$  NMR spectrum of **8a** (400 MHz,  $\text{CDCl}_3$ , dr = 97:3).

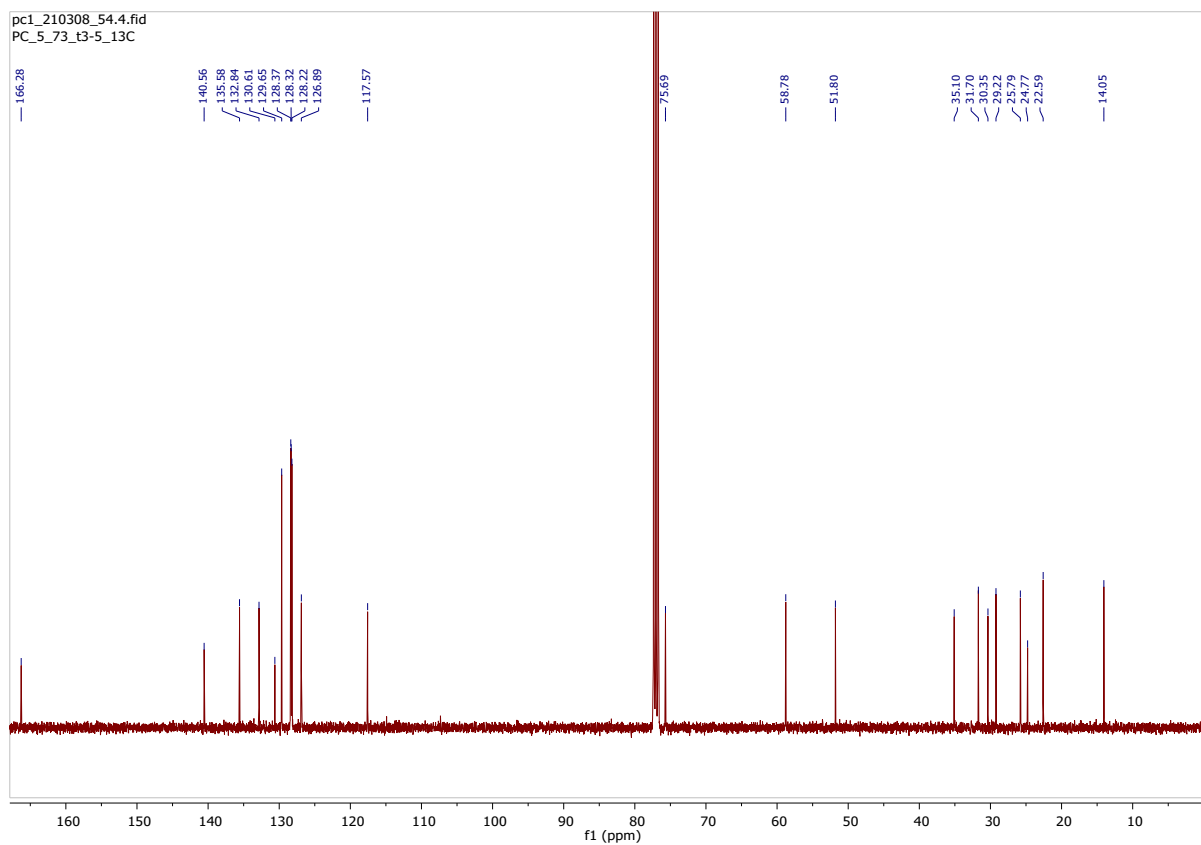

Figure 43:  $^{13}\text{C}$  NMR spectrum of **8a** (101 MHz,  $\text{CDCl}_3$ ).

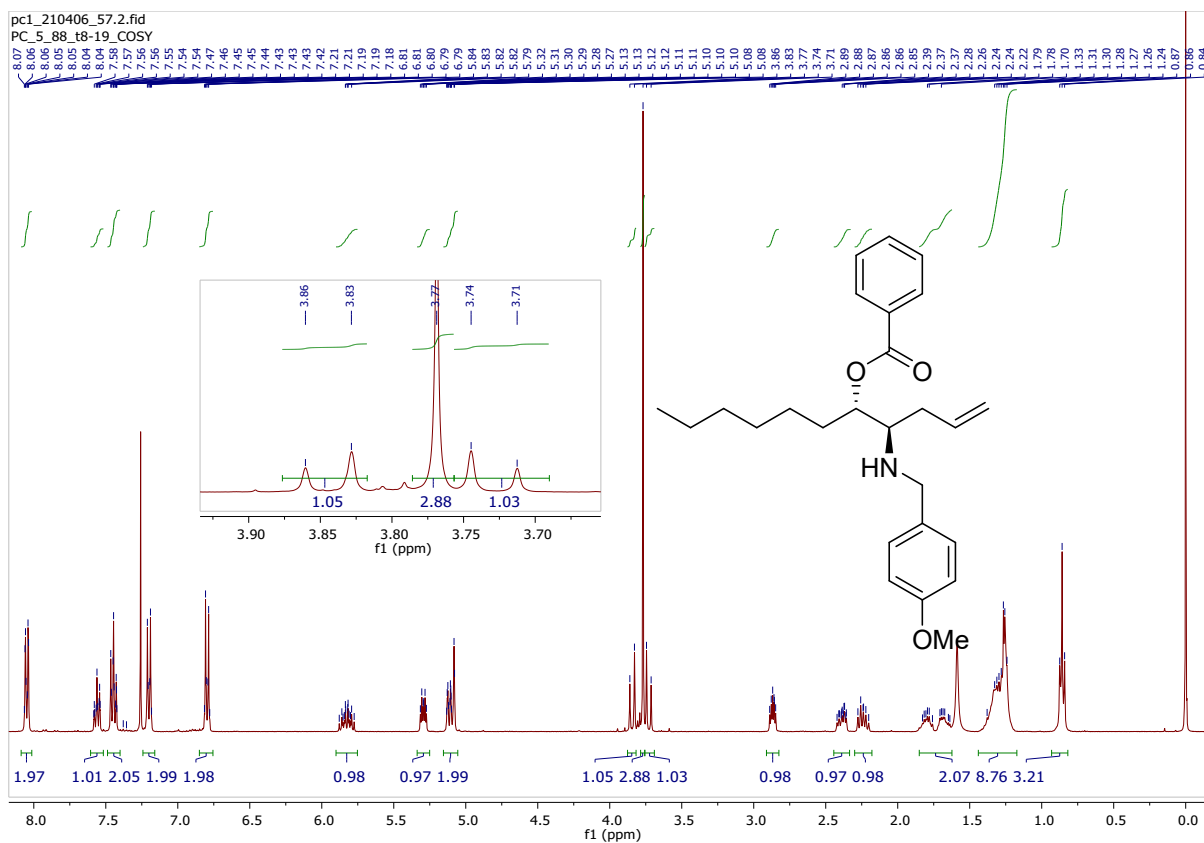

Figure 44:  $^1\text{H}$  NMR spectrum of **8b** (400 MHz,  $\text{CDCl}_3$ , dr = 99:1).

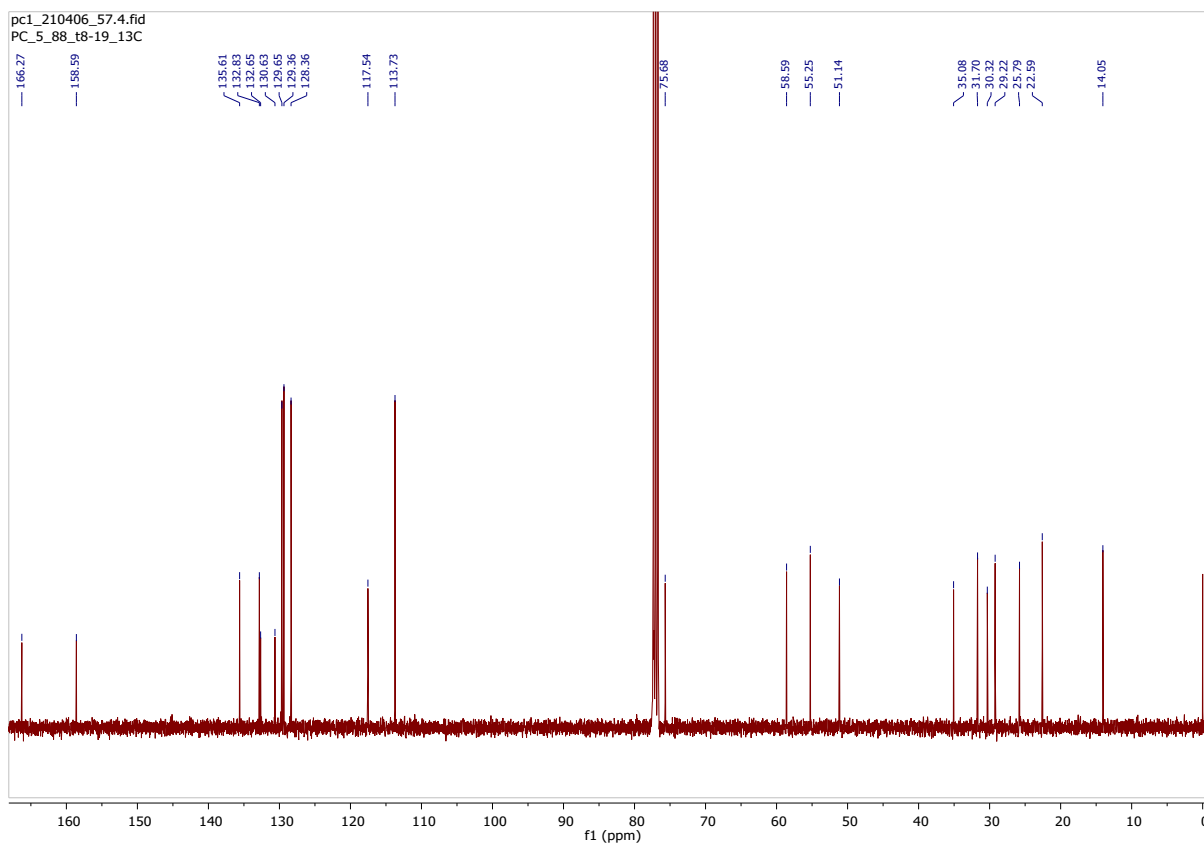

Figure 45:  $^{13}\text{C}$  NMR spectrum of **8b** (101 MHz,  $\text{CDCl}_3$ ).



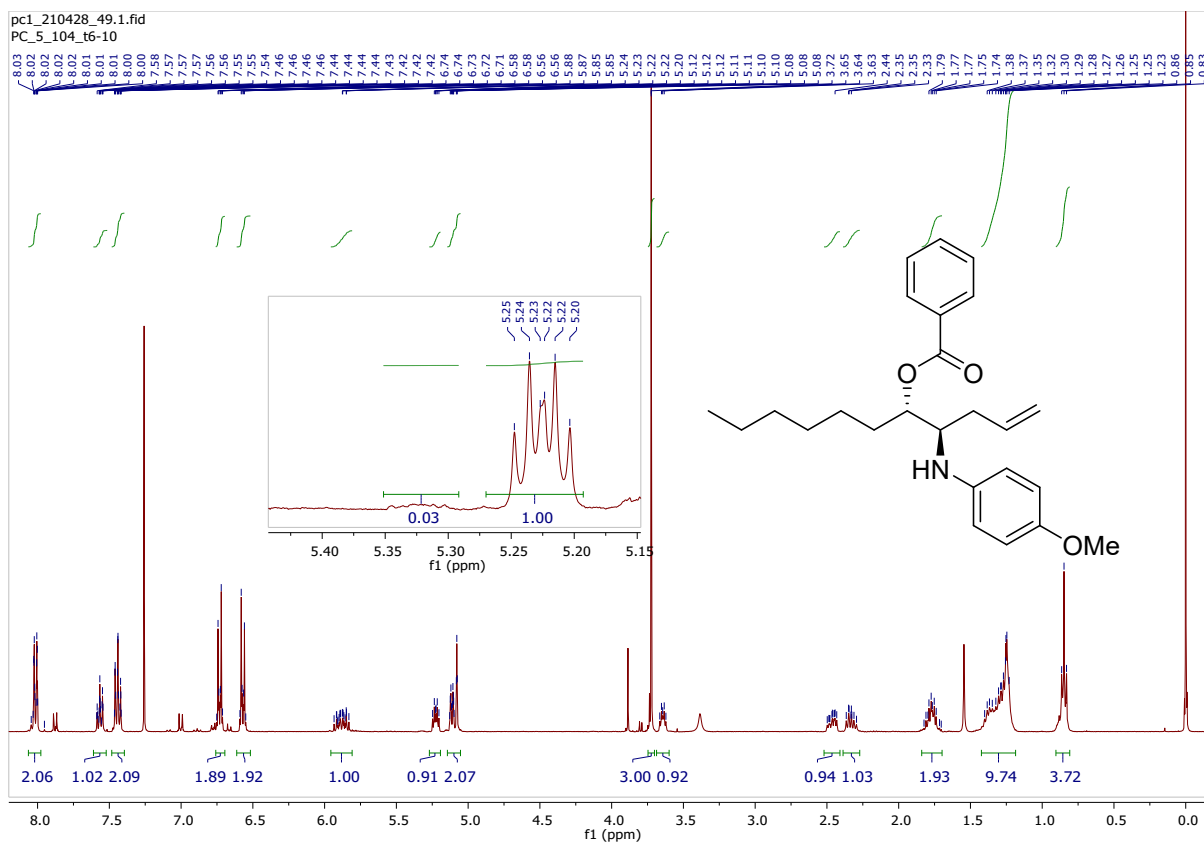

**Figure 48:**  $^1\text{H}$  NMR spectrum of **8d** (400 MHz,  $\text{CDCl}_3$ , dr = 97:3).

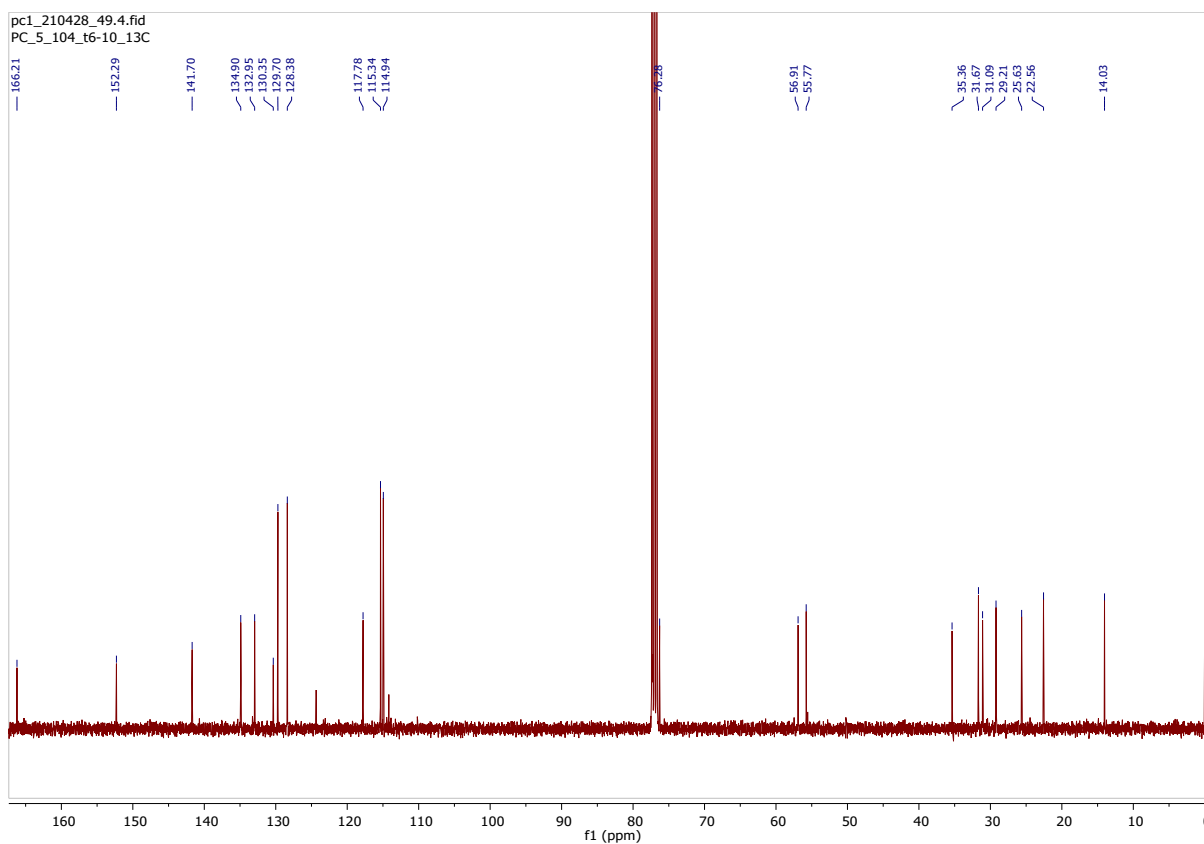

**Figure 49:**  $^{13}\text{C}$  NMR spectrum of **8d** (101 MHz,  $\text{CDCl}_3$ ).

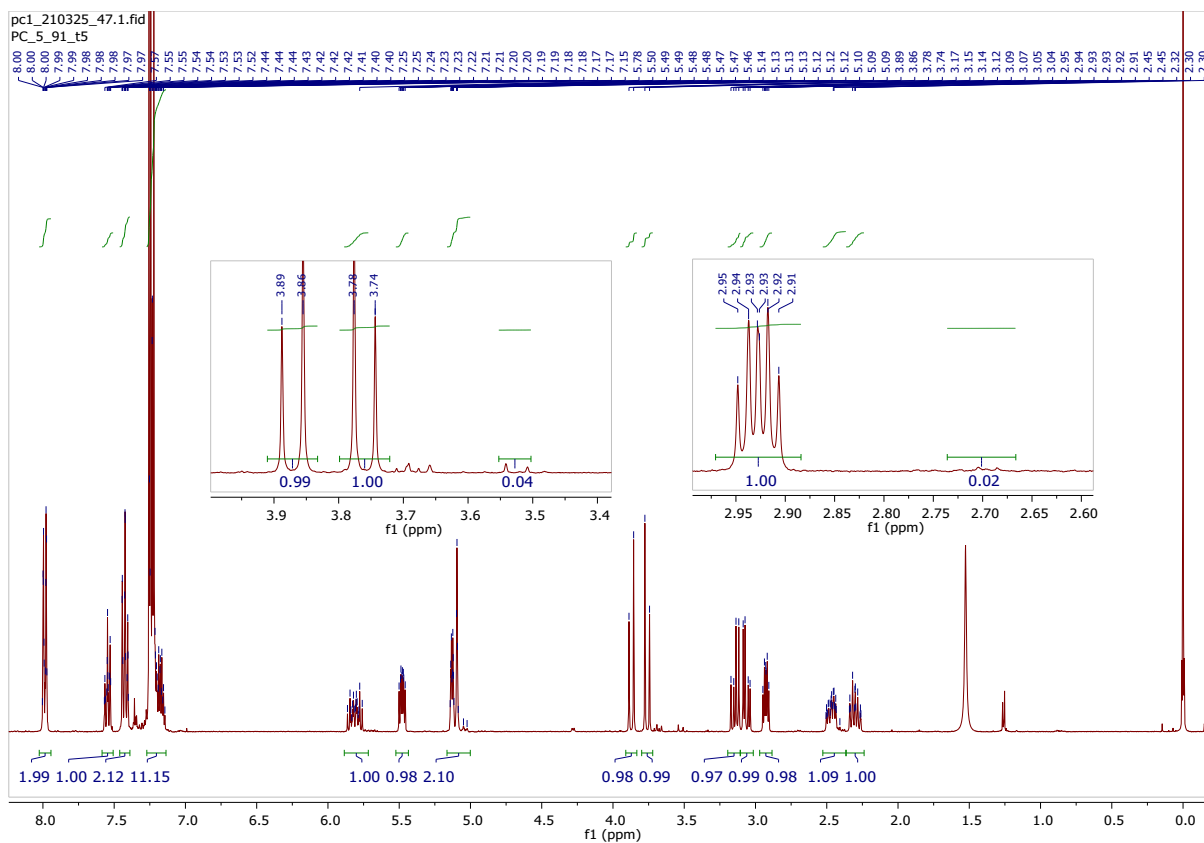

Figure 50:  $^1\text{H}$  NMR spectrum of **8e** (400 MHz,  $\text{CDCl}_3$ , dr = 97:3).

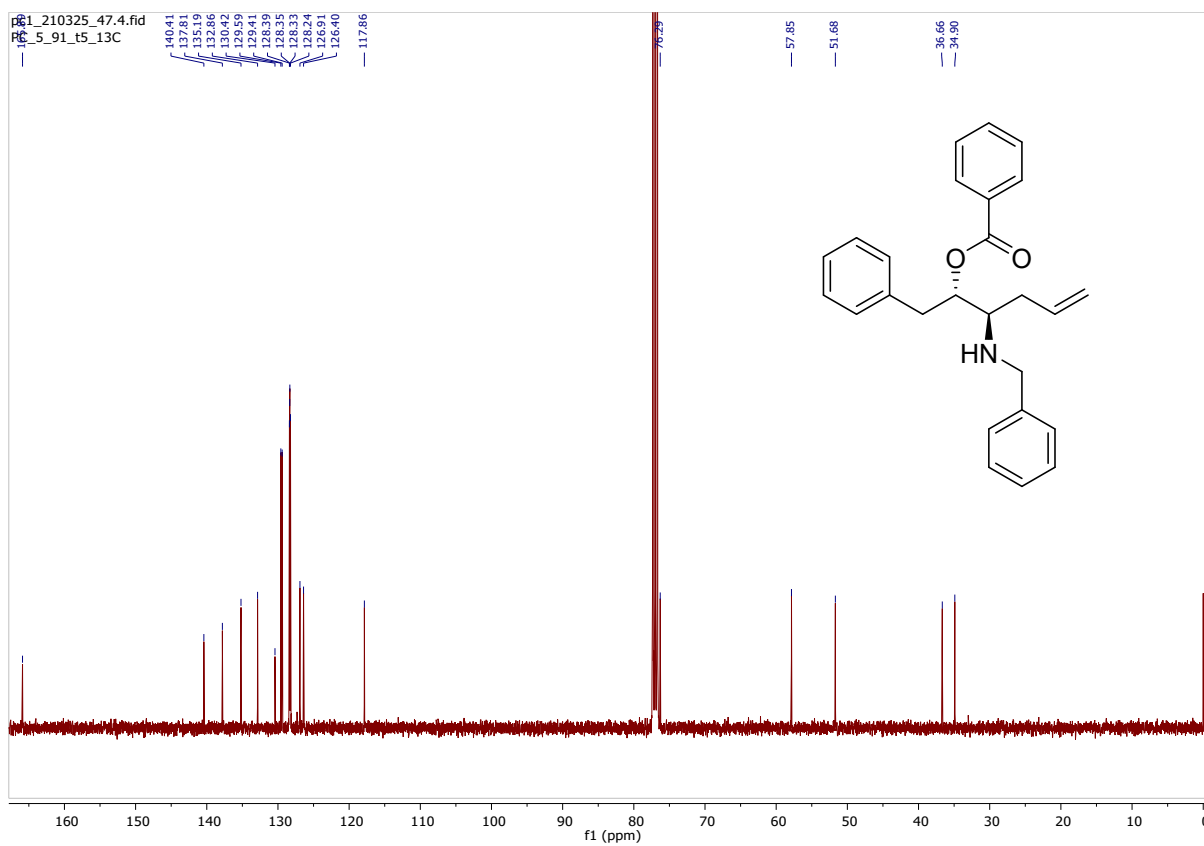

Figure 51:  $^{13}\text{C}$  NMR spectrum of **8e** (101 MHz,  $\text{CDCl}_3$ ).

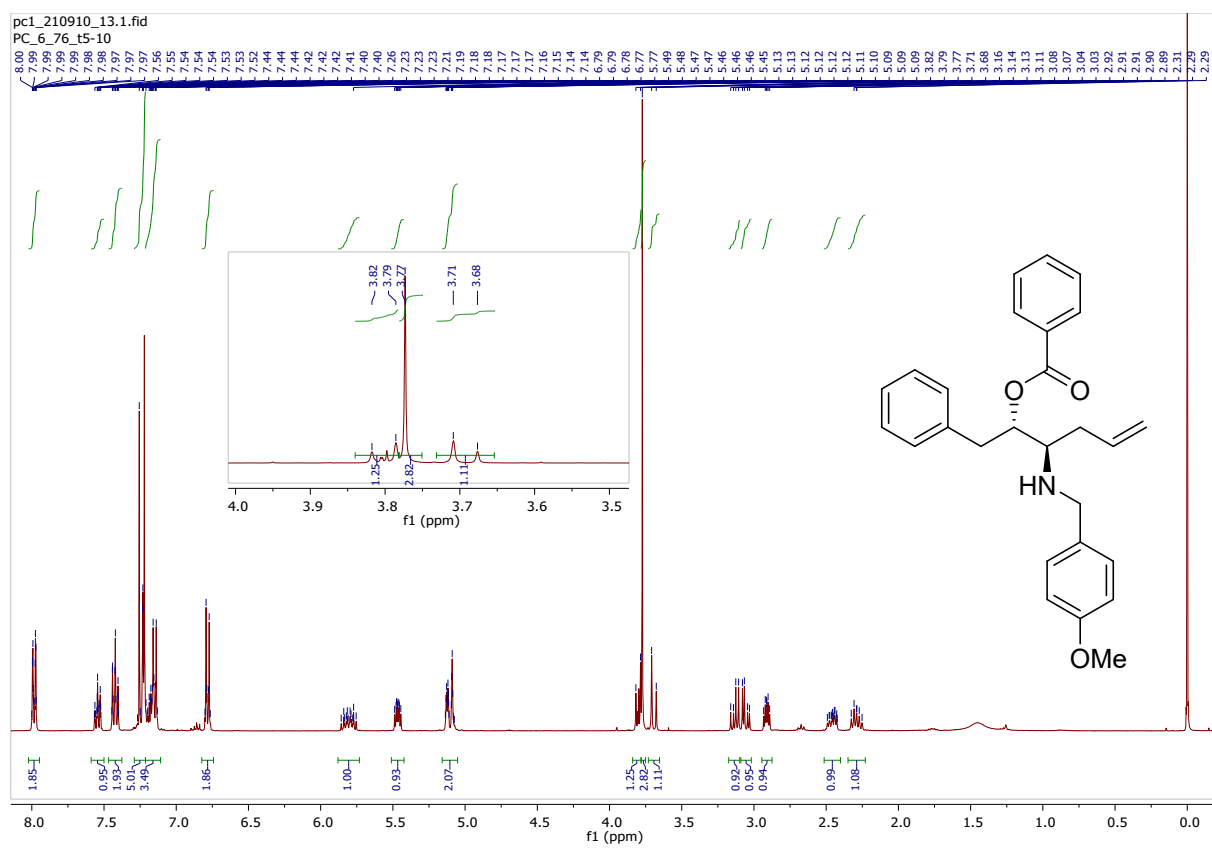

Figure 52: <sup>1</sup>H NMR spectrum of **8f** (400 MHz, CDCl<sub>3</sub>, dr = 99:1).

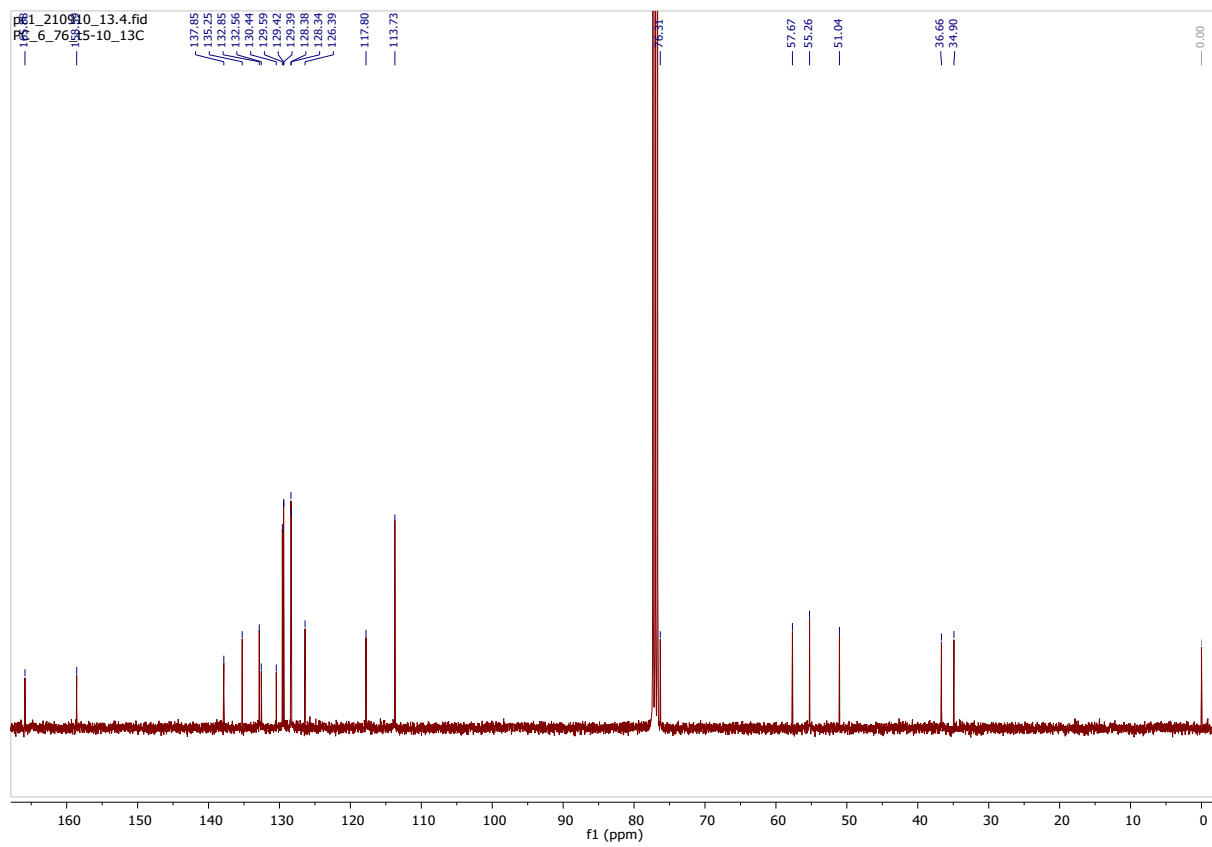

Figure 53: <sup>13</sup>C NMR spectrum of **8f** (101 MHz, CDCl<sub>3</sub>).



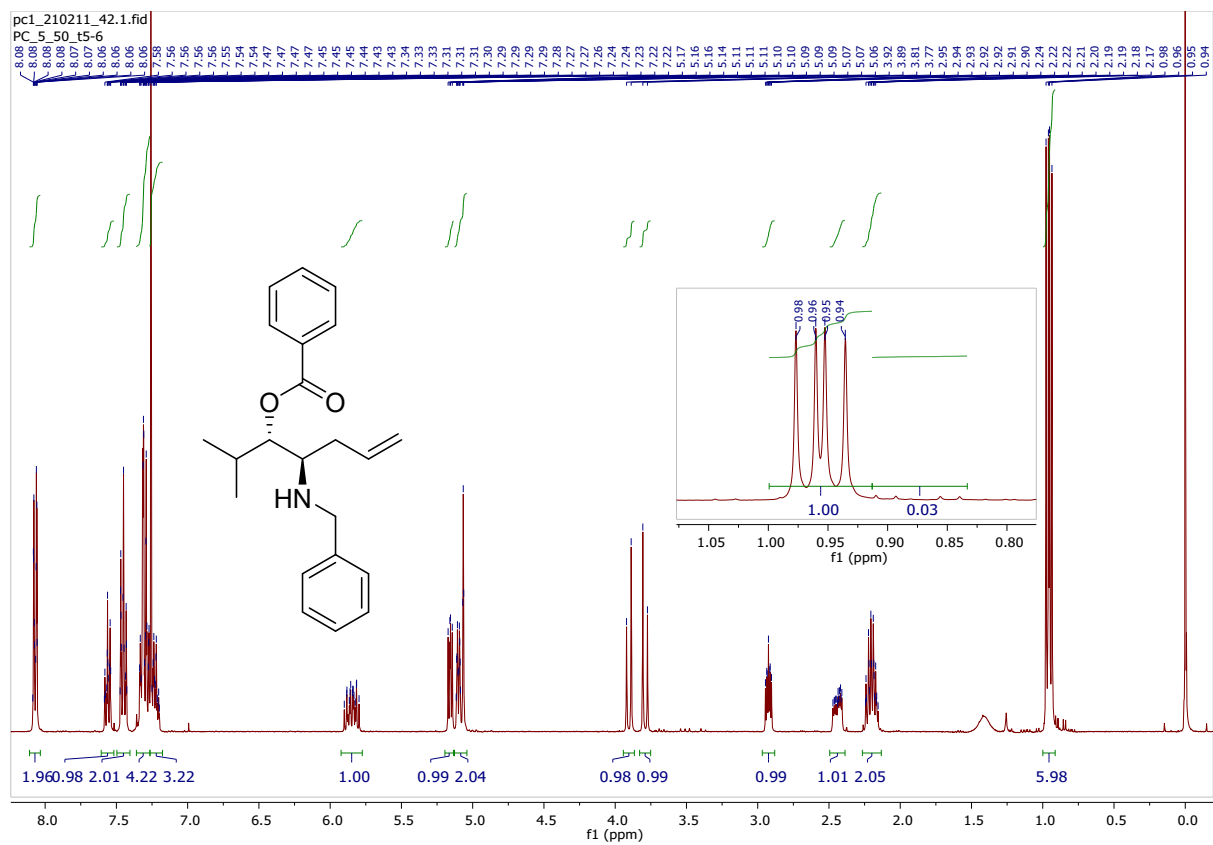

**Figure 54:**  $^1\text{H}$  NMR spectrum of **8g** (400 MHz,  $\text{CDCl}_3$ , dr = 97:3).

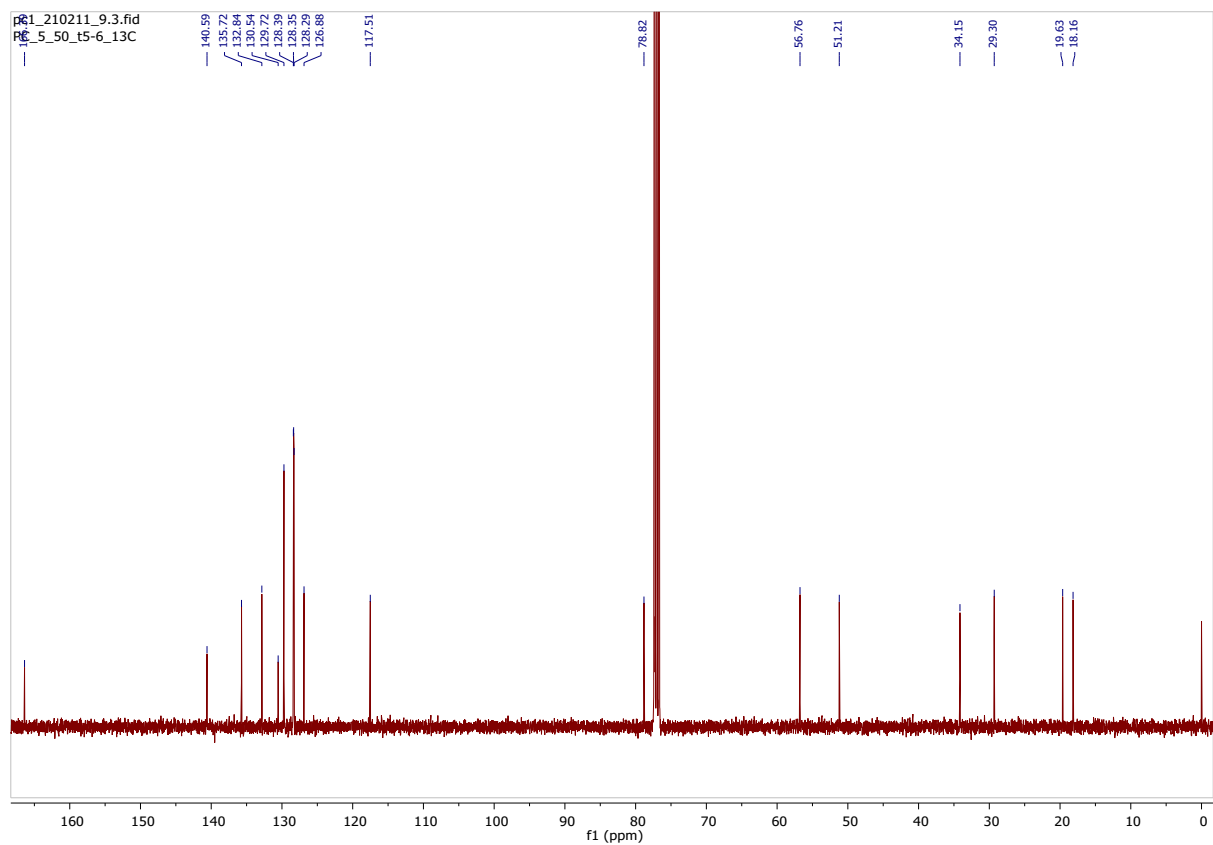

**Figure 55:**  $^{13}\text{C}$  NMR spectrum of **8g** (400 MHz,  $\text{CDCl}_3$ ).

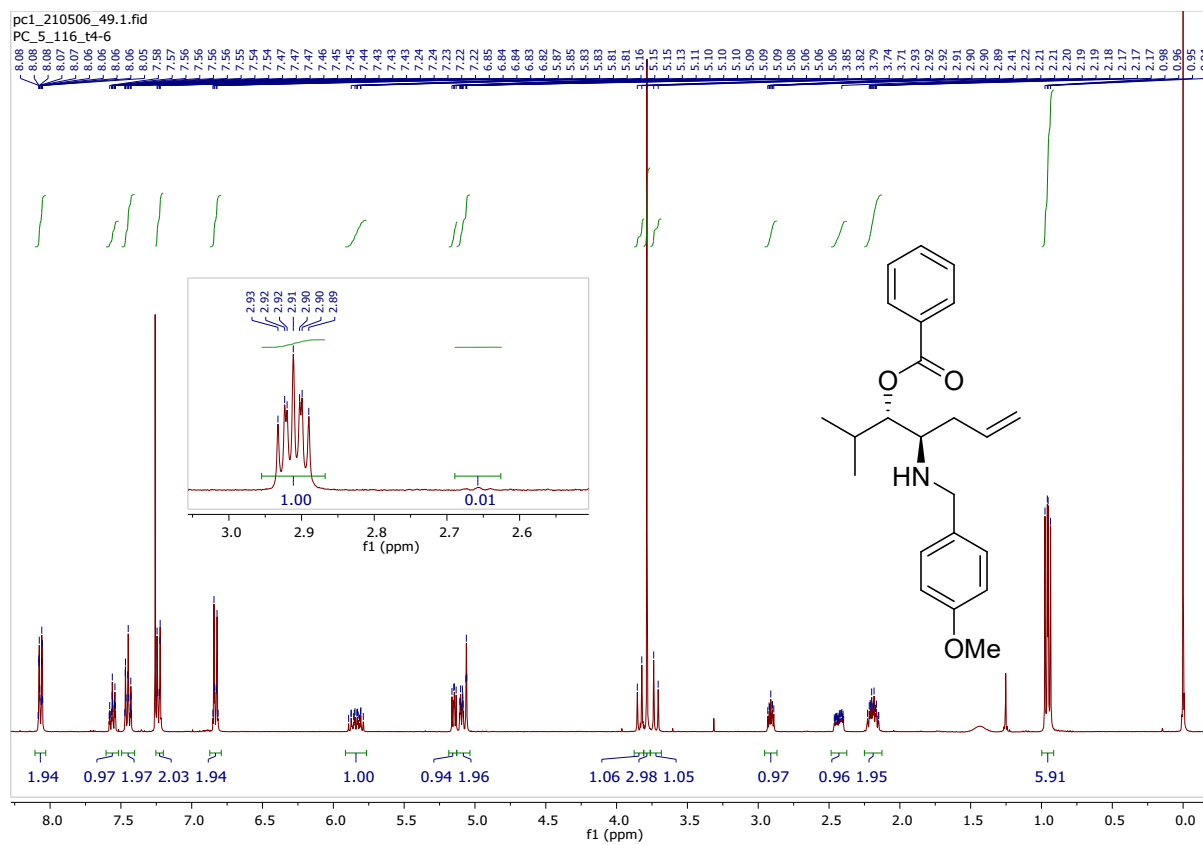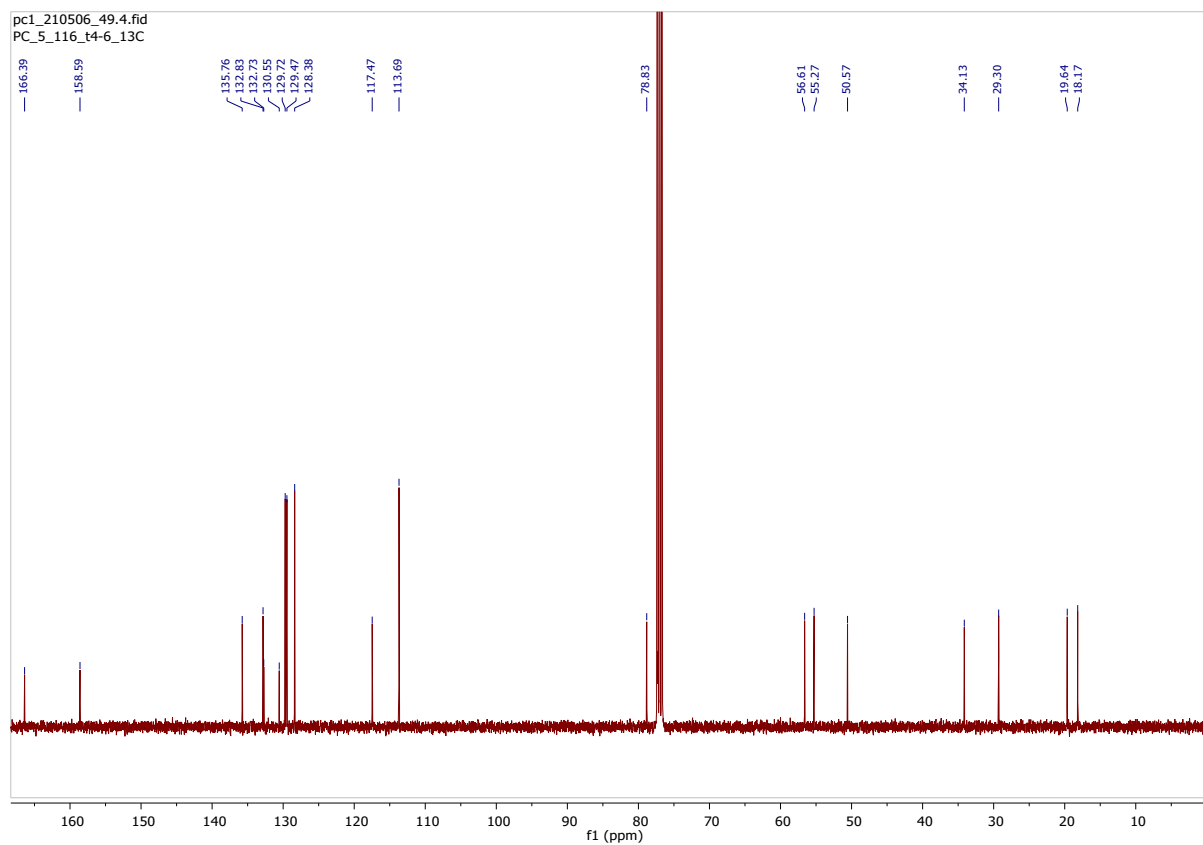

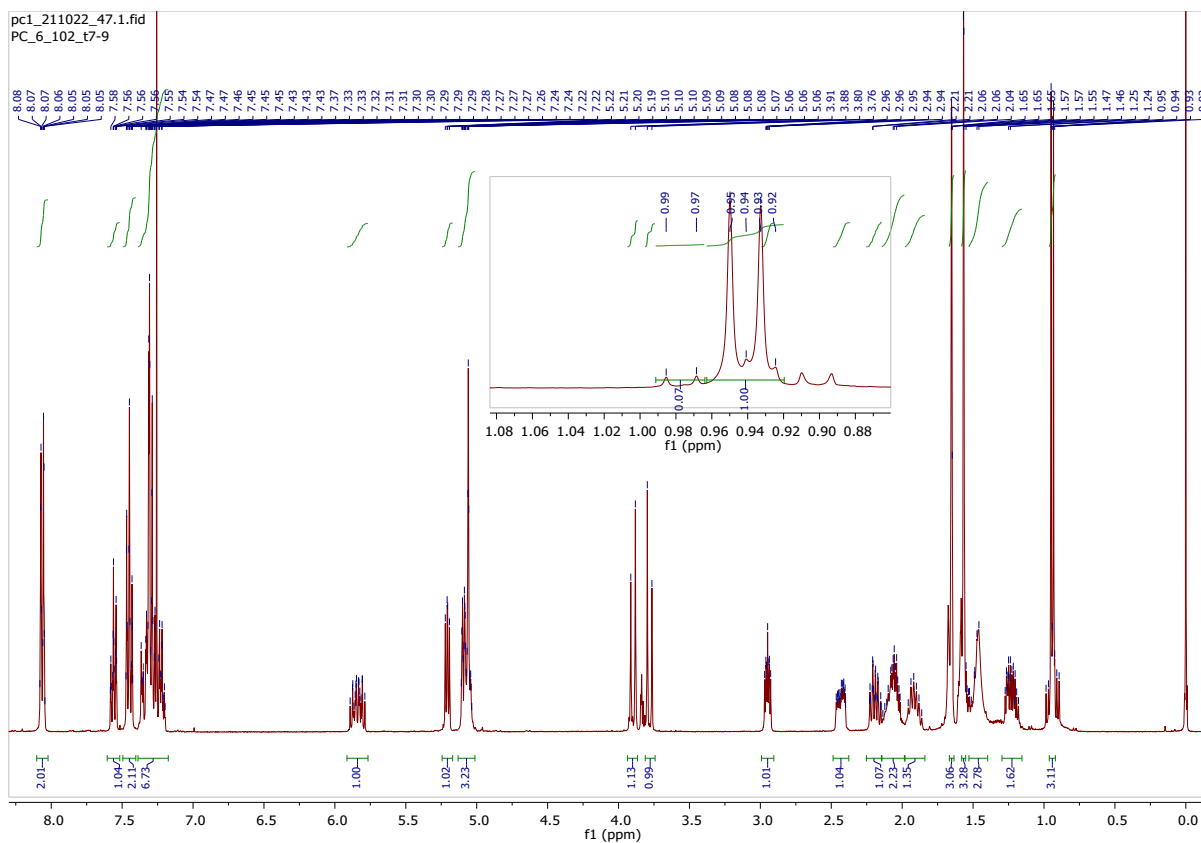

**Figure 58:**  $^1\text{H}$  NMR spectrum of **8i** (400 MHz,  $\text{CDCl}_3$ , dr [**8i**:**8j**] = 93:7). The other doublets at 0.88-0.94 ppm are likely to be *syn*-aminoester diastereomers, but could not be unequivocally identified as such.

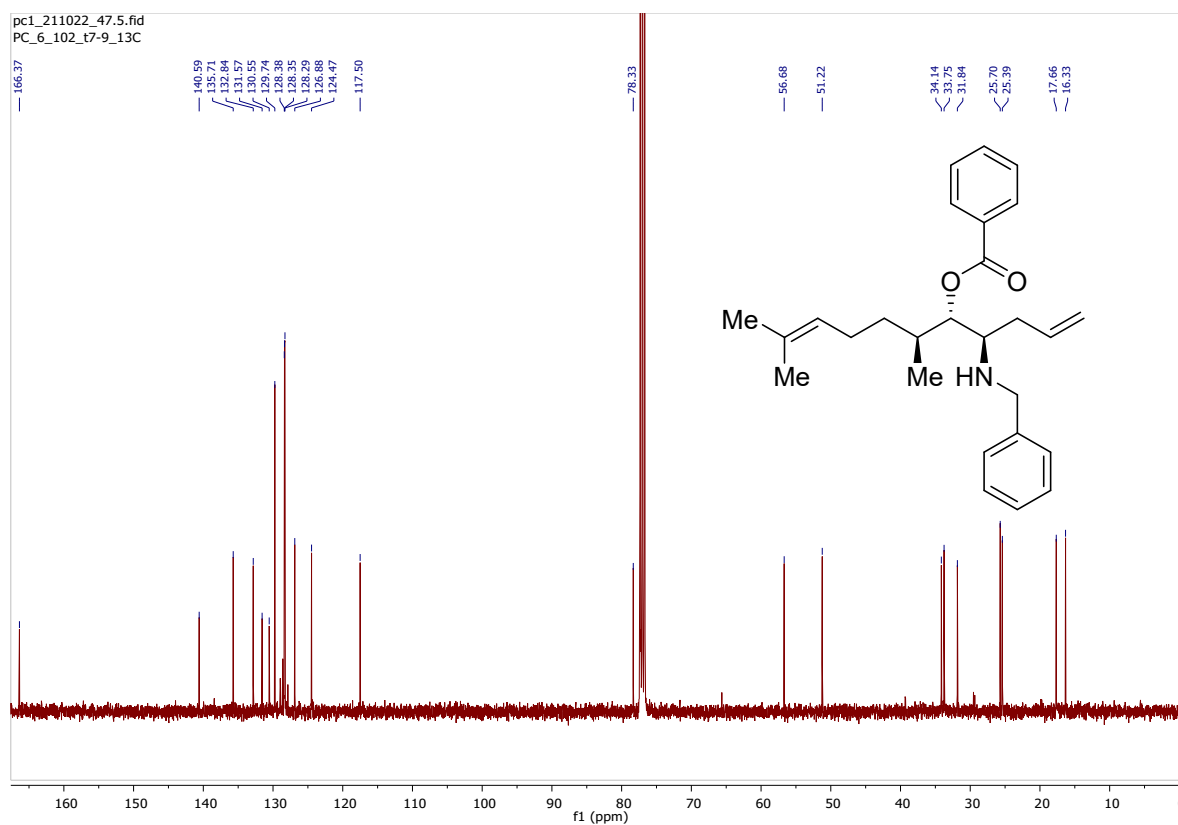

**Figure 59:**  $^{13}\text{C}$  NMR spectrum of **8i** (101 MHz,  $\text{CDCl}_3$ ).

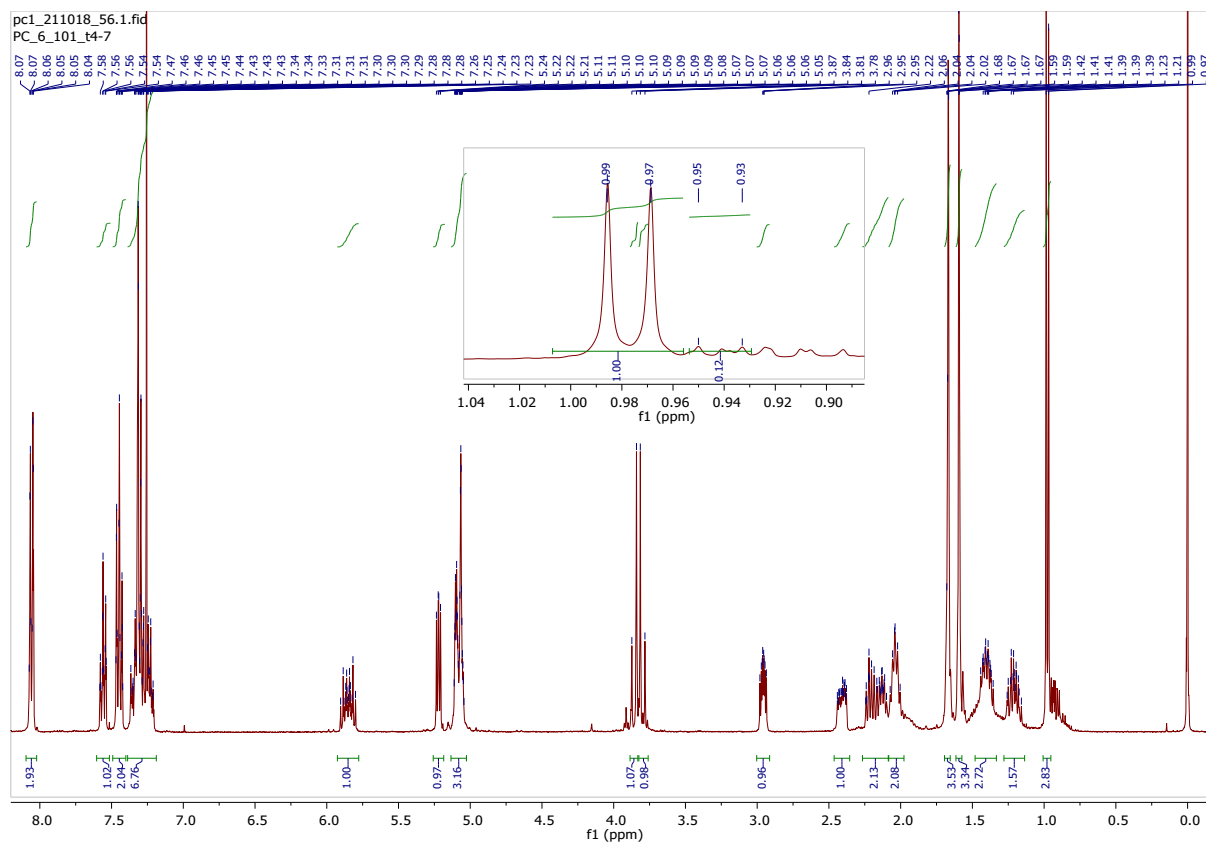

**Figure 60:**  $^1\text{H}$  NMR spectrum of **8j** (400 MHz,  $\text{CDCl}_3$ , dr [**8i**:**8j**] = 10:90). The other doublets at 0.89-0.94 ppm are likely to be *syn*-aminoester diastereomers, but could not be unequivocally identified as such.

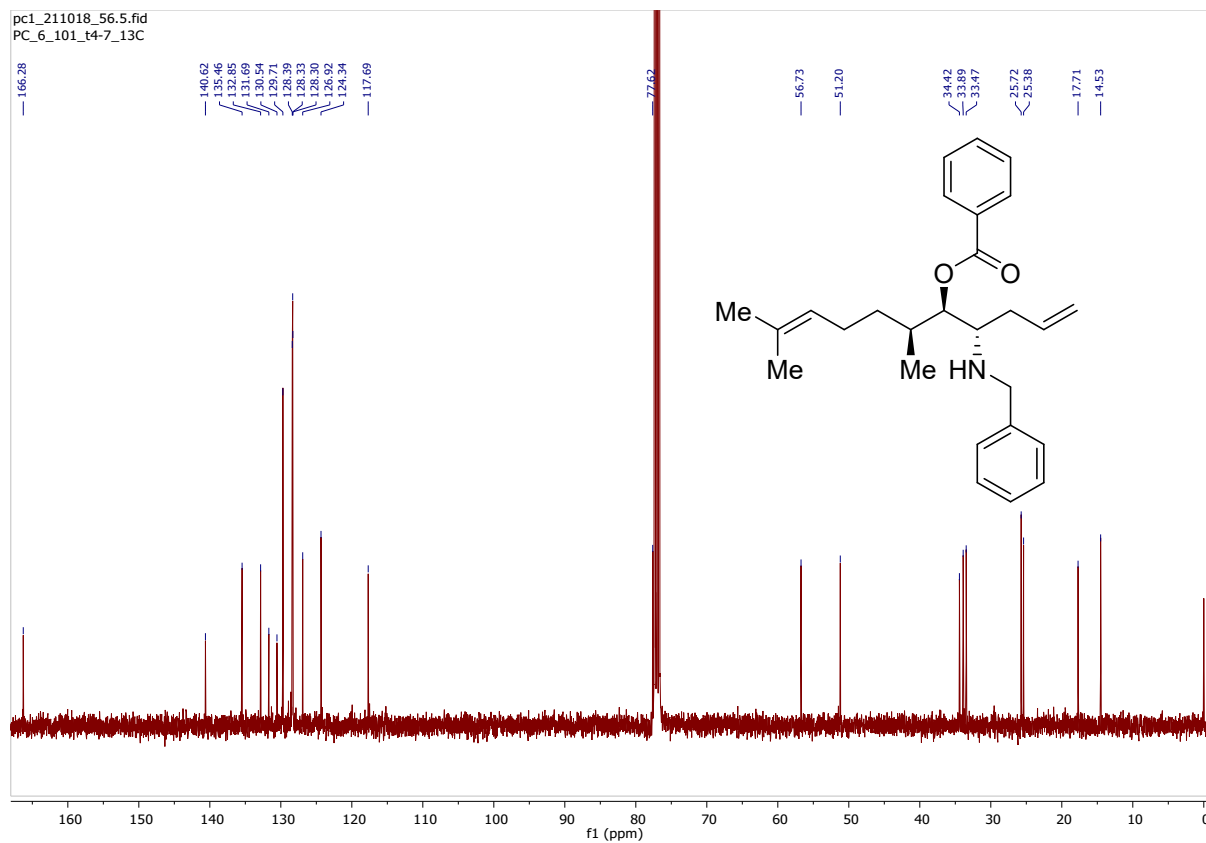

**Figure 61:**  $^{13}\text{C}$  NMR spectrum of **8j** (101 MHz,  $\text{CDCl}_3$ ).

Chromatogram  
PC\_6\_18\_3.lcd  
mAU

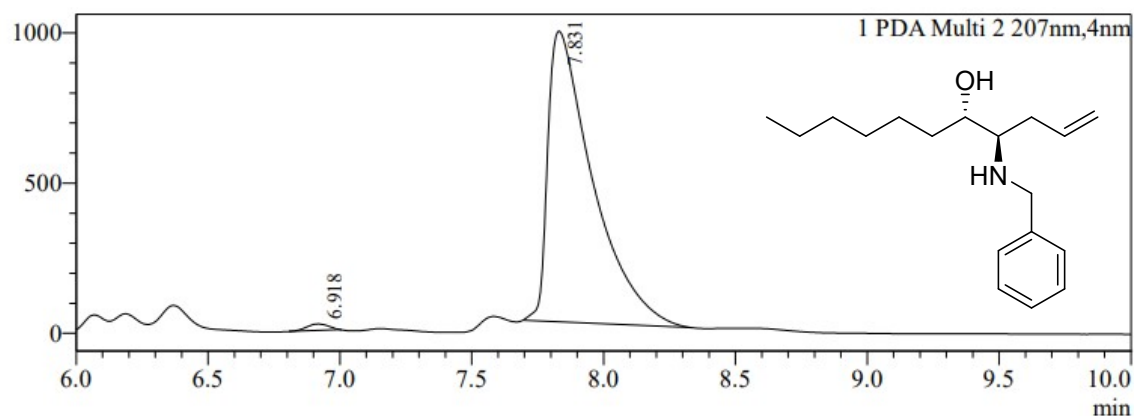

Peak Table  
PDA Ch2 207nm

| Peak# | Ret. Time | Area%   | Name |
|-------|-----------|---------|------|
| 1     | 6.918     | 1.056   |      |
| 2     | 7.831     | 98.944  |      |
| Total |           | 100.000 |      |

**Figure 62:** Chiral HPLC trace of *ent-7a*.

Chromatogram  
PC\_6\_22\_3.lcd  
mAU

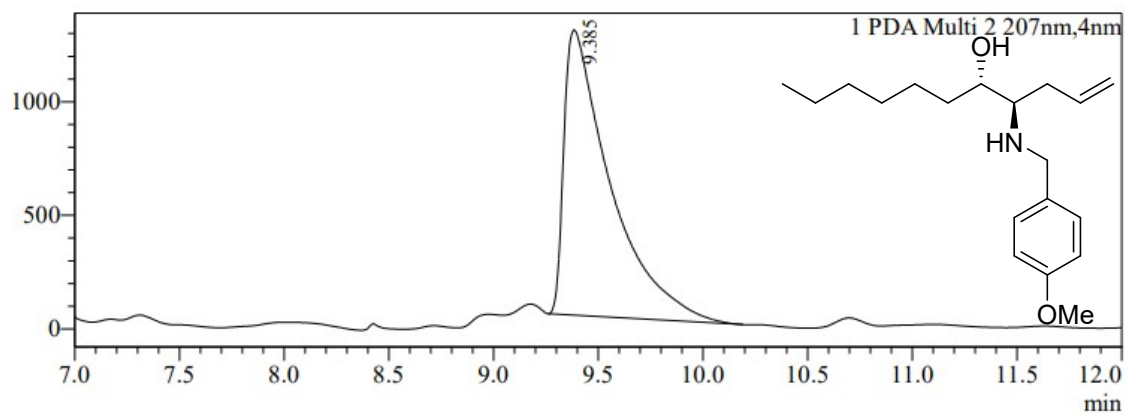

Peak Table  
PDA Ch2 207nm

| Peak# | Ret. Time | Area%   | Name |
|-------|-----------|---------|------|
| 1     | 9.385     | 100.000 |      |
| Total |           | 100.000 |      |

**Figure 63:** Chiral HPLC trace of *ent-7b*.

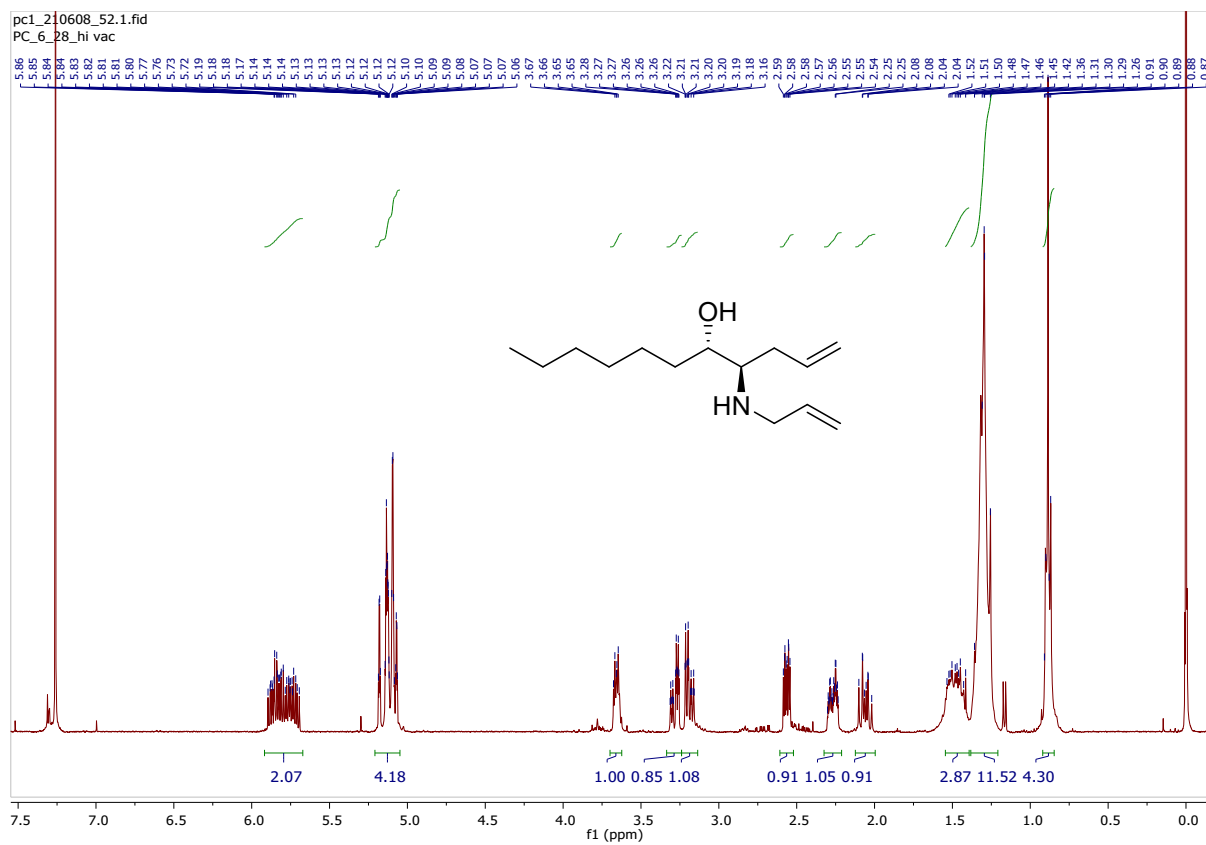

Figure 64:  $^1\text{H}$  NMR spectrum of SI-10 (400 MHz,  $\text{CDCl}_3$ ).

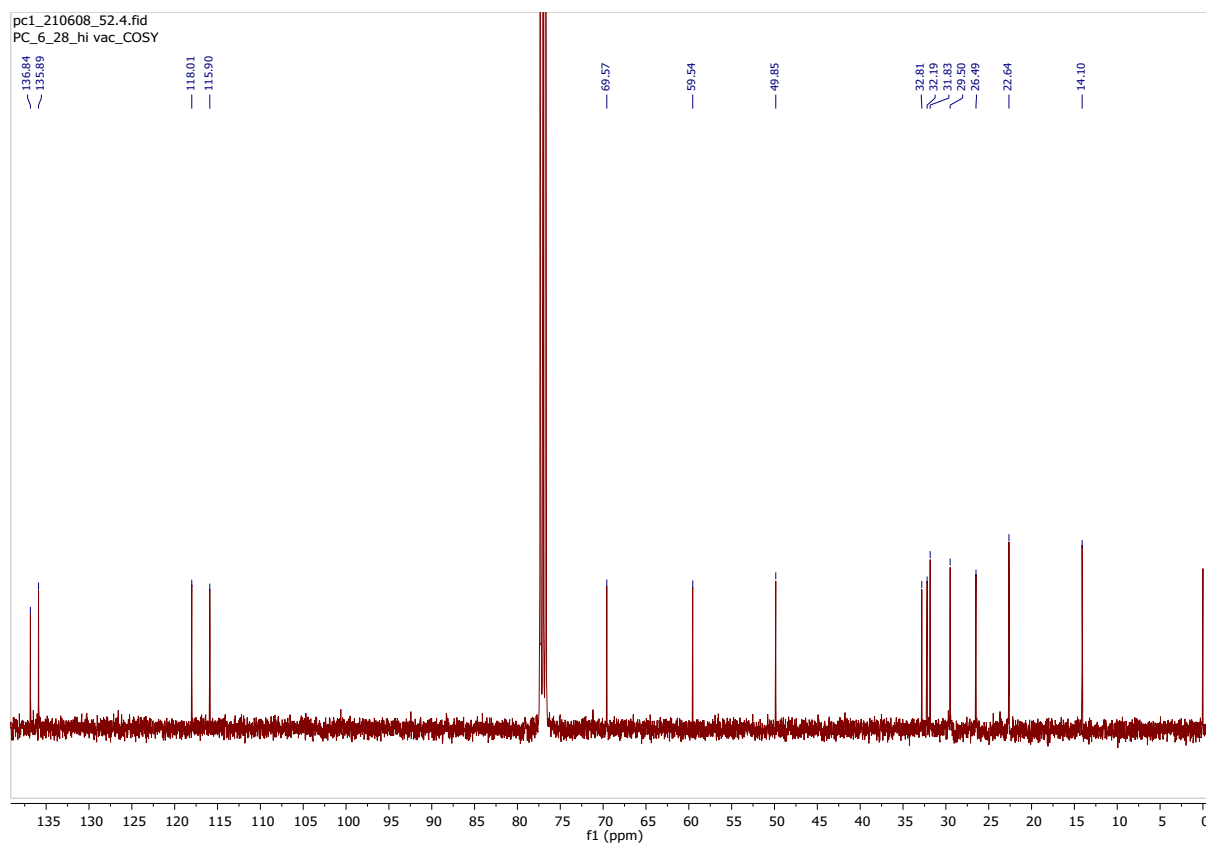

Figure 65:  $^{13}\text{C}$  NMR spectrum of SI-10 (101 MHz,  $\text{CDCl}_3$ ).

Chromatogram  
PC\_6\_29\_9.lcd  
mAU

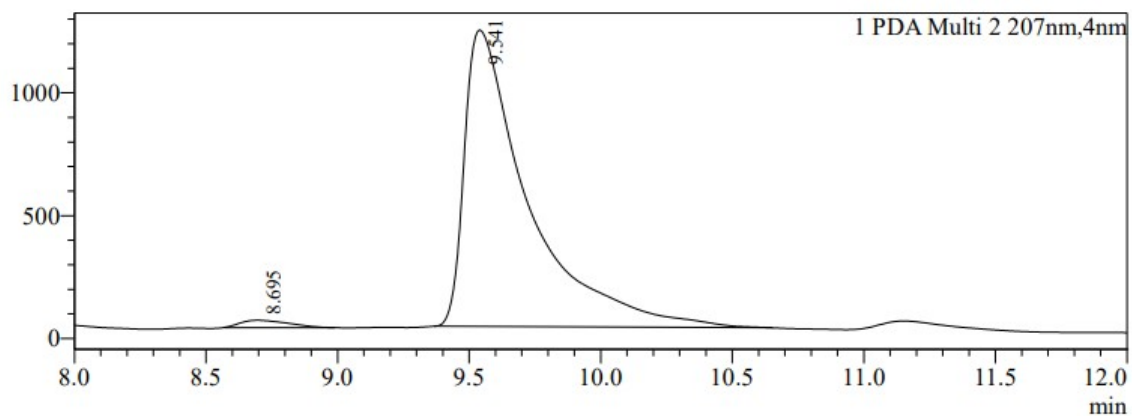

Peak Table  
PDA Ch2 207nm

| Peak# | Ret. Time | Area%   | Name |
|-------|-----------|---------|------|
| 1     | 8.695     | 1.839   |      |
| 2     | 9.541     | 98.161  |      |
| Total |           | 100.000 |      |

**Figure 66:** Chiral HPLC trace of SI-10.

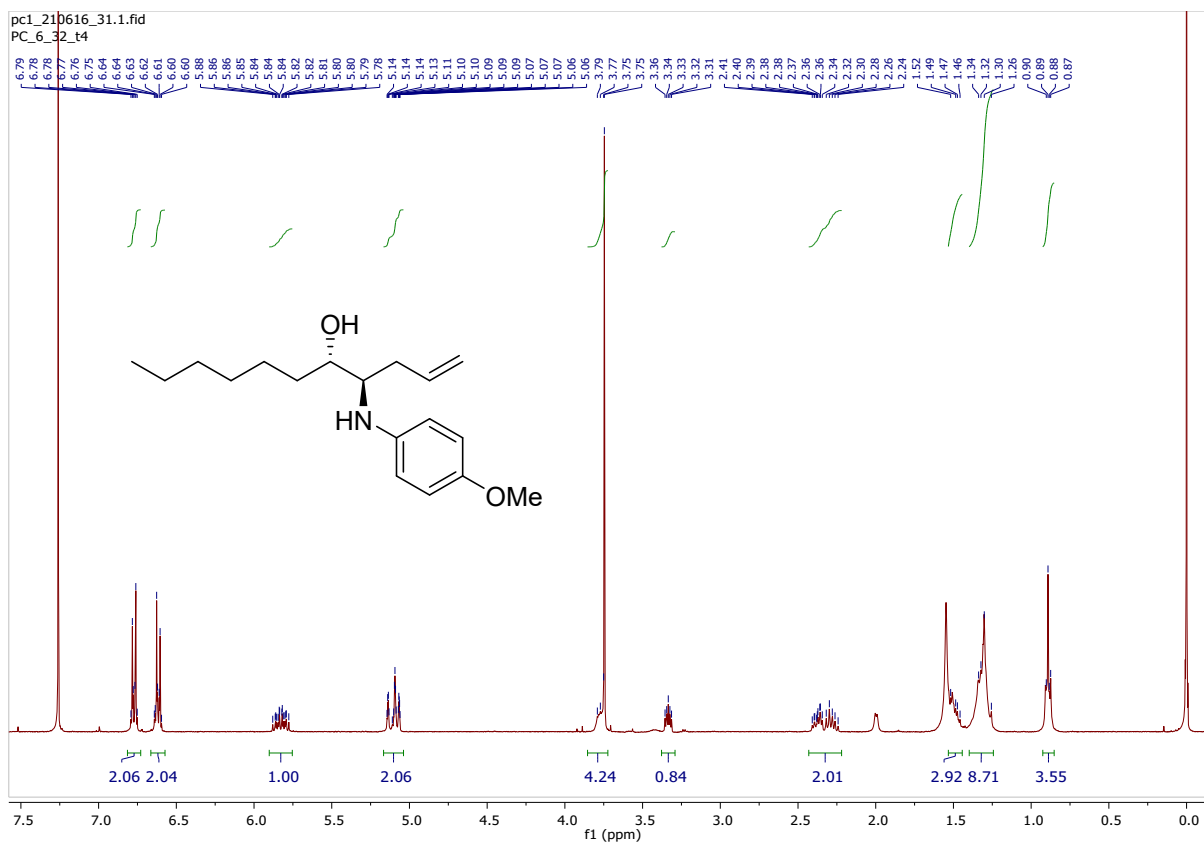

Figure 67:  $^1\text{H}$  NMR spectrum of SI-11 (400 MHz,  $\text{CDCl}_3$ ).

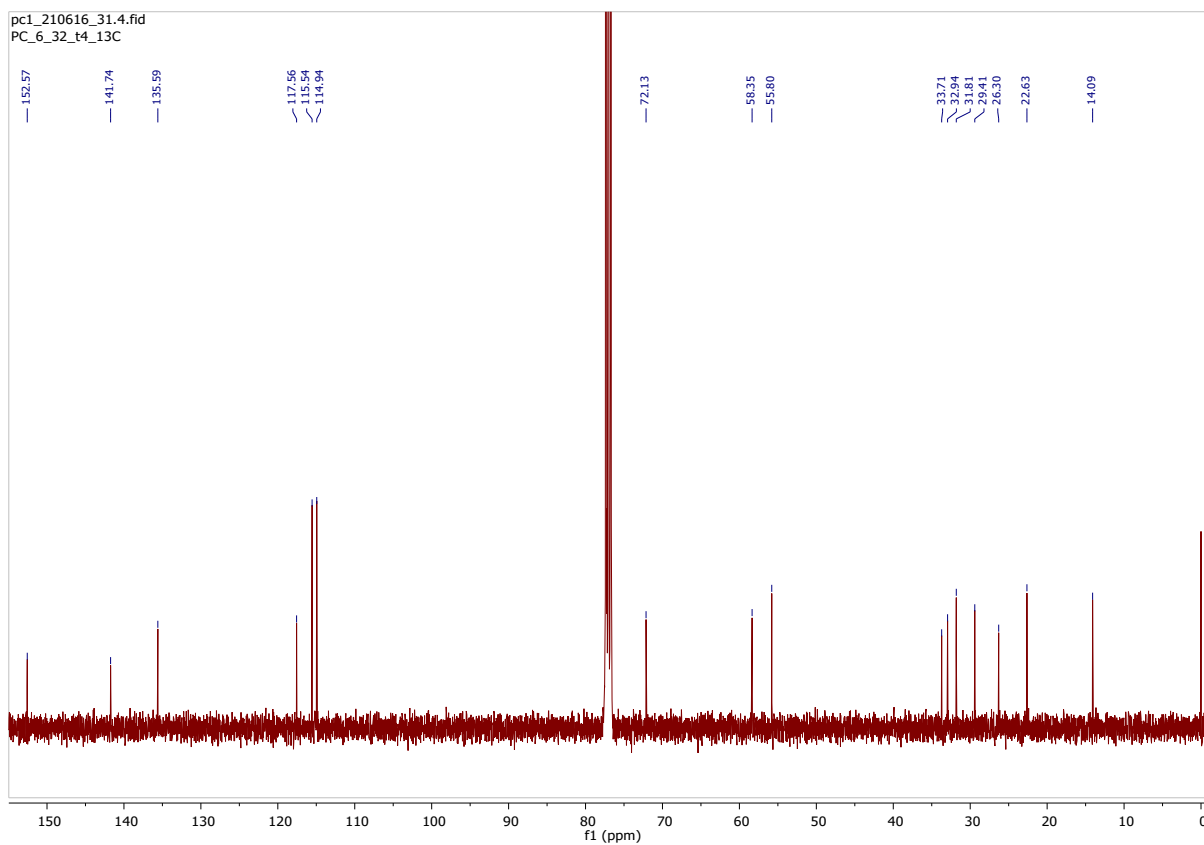

Figure 68:  $^{13}\text{C}$  NMR spectrum of SI-11 (101 MHz,  $\text{CDCl}_3$ ).



Chromatogram  
PC\_6\_32\_3.lcd  
mAU

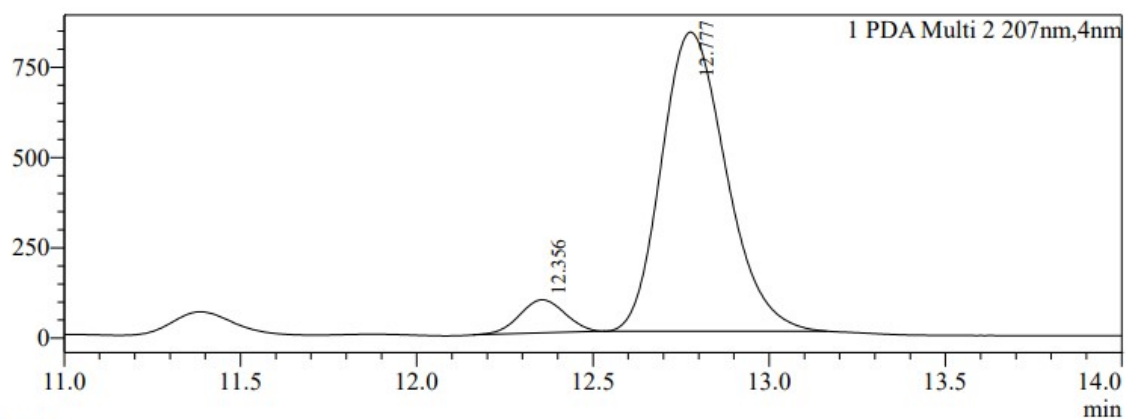

Peak Table  
PDA Ch2 207nm

| Peak# | Ret. Time | Area%   | Name |
|-------|-----------|---------|------|
| 1     | 12.356    | 7.167   |      |
| 2     | 12.777    | 92.833  |      |
| Total |           | 100.000 |      |

**Figure 69:** Chiral HPLC trace of **SI-11**. The peak at  $R_t \sim 11.4$  min likely corresponds to the *syn*-diastereomer.

Chromatogram  
PC\_6\_25\_1.lcd  
mAU

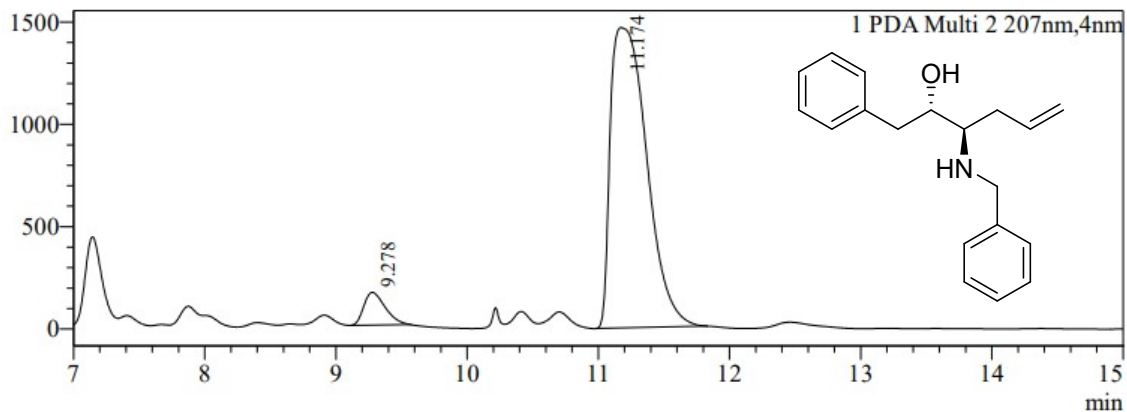

Peak Table  
PDA Ch2 207nm

| Peak# | Ret. Time | Area%   | Name |
|-------|-----------|---------|------|
| 1     | 9.278     | 6.001   |      |
| 2     | 11.174    | 93.999  |      |
| Total |           | 100.000 |      |

Figure 70: Chiral HPLC trace of *ent-7c* (Method 1 derivative).

Chromatogram  
batch1\_8112021\_PC\_6\_110\_2\_005.lcd  
mAU

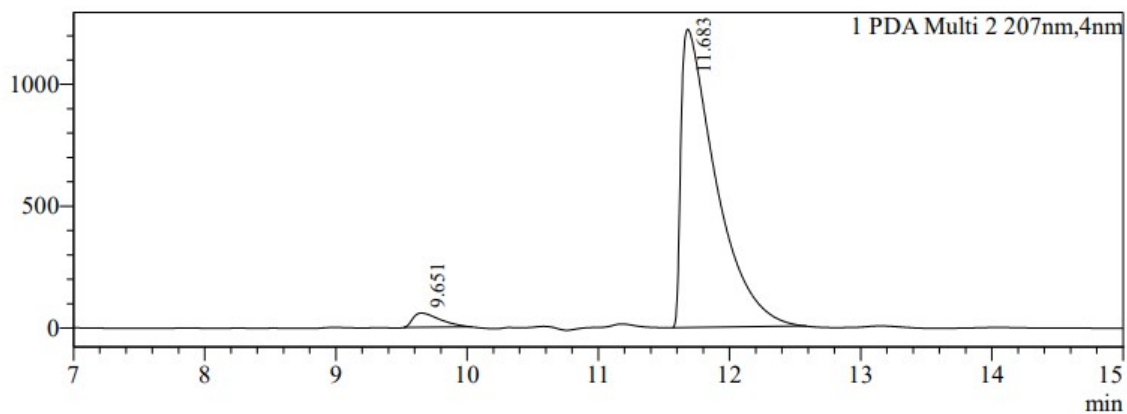

Peak Table  
PDA Ch2 207nm

| Peak# | Ret. Time | Area%   | Name |
|-------|-----------|---------|------|
| 1     | 9.651     | 3.575   |      |
| 2     | 11.683    | 96.425  |      |
| Total |           | 100.000 |      |

Figure 71: Chiral HPLC trace of *ent-7c* (Method 2 derivative).

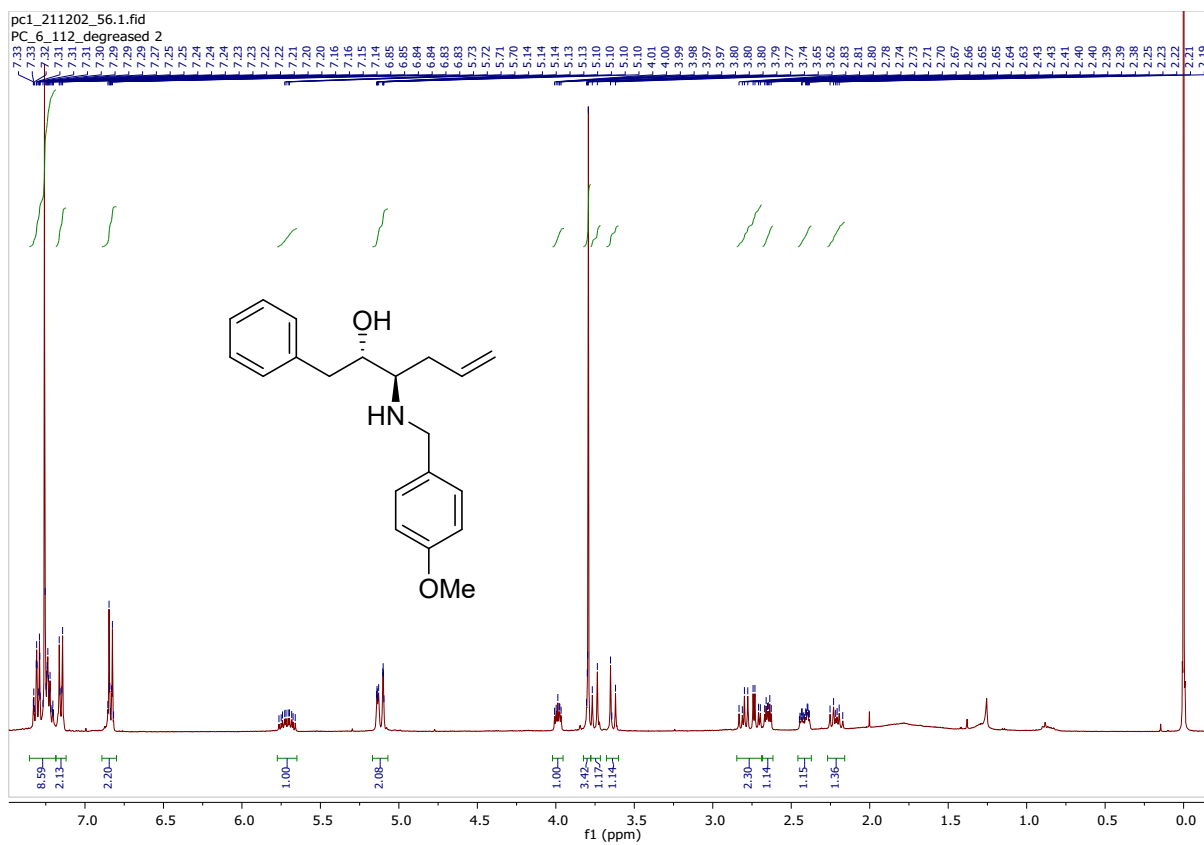

Figure 72:  $^1\text{H}$  NMR spectrum of SI-12 (400 MHz,  $\text{CDCl}_3$ ).

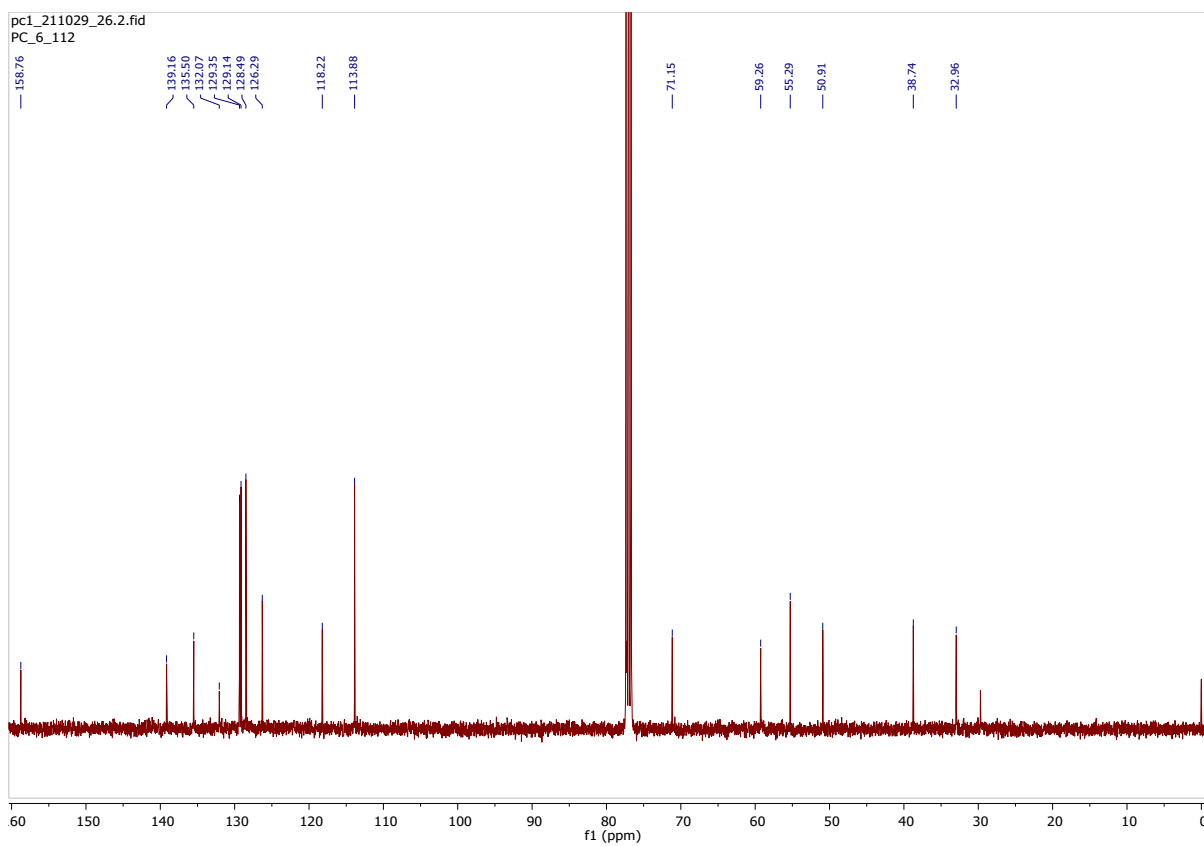

Figure 73:  $^{13}\text{C}$  NMR spectrum of SI-12 (101 MHz,  $\text{CDCl}_3$ ).

Chromatogram  
PC\_6\_112\_3.lcd  
mAU

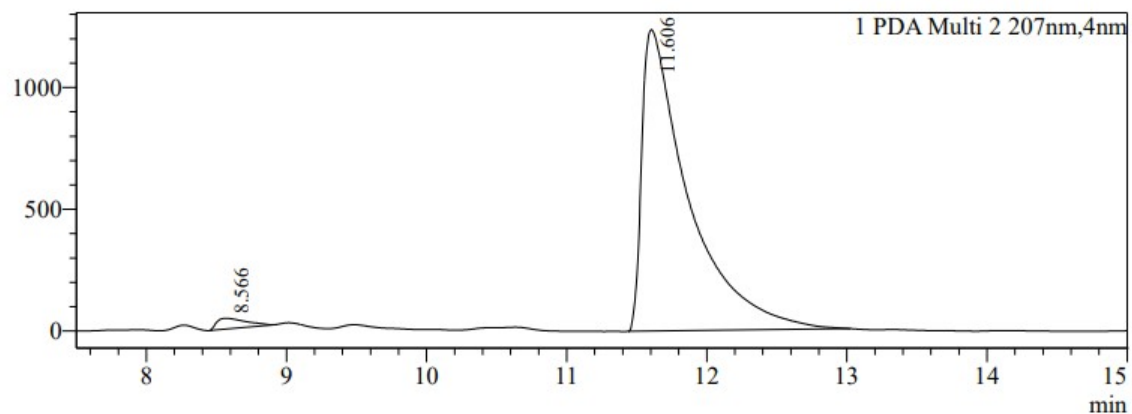

Peak Table  
PDA Ch2 207nm

| Peak# | Ret. Time | Area%   | Name |
|-------|-----------|---------|------|
| 1     | 8.566     | 2.162   |      |
| 2     | 11.606    | 97.838  |      |
| Total |           | 100.000 |      |

**Figure 74:** Chiral HPLC trace of SI-12.

Chromatogram  
PC\_6\_12\_1.lcd  
mAU

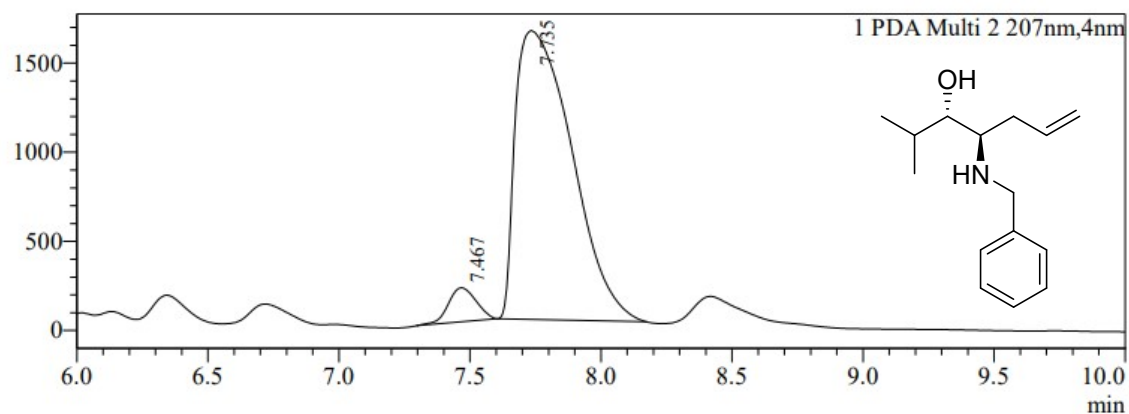

Peak Table  
PDA Ch2 207nm

| Peak# | Ret. Time | Area%   | Name |
|-------|-----------|---------|------|
| 1     | 7.467     | 5.448   |      |
| 2     | 7.735     | 94.552  |      |
| Total |           | 100.000 |      |

**Figure 75:** Chiral HPLC trace of *ent-7e*.

Chromatogram  
PC\_4\_75\_6\_12\_scal\_1.lcd  
mAU

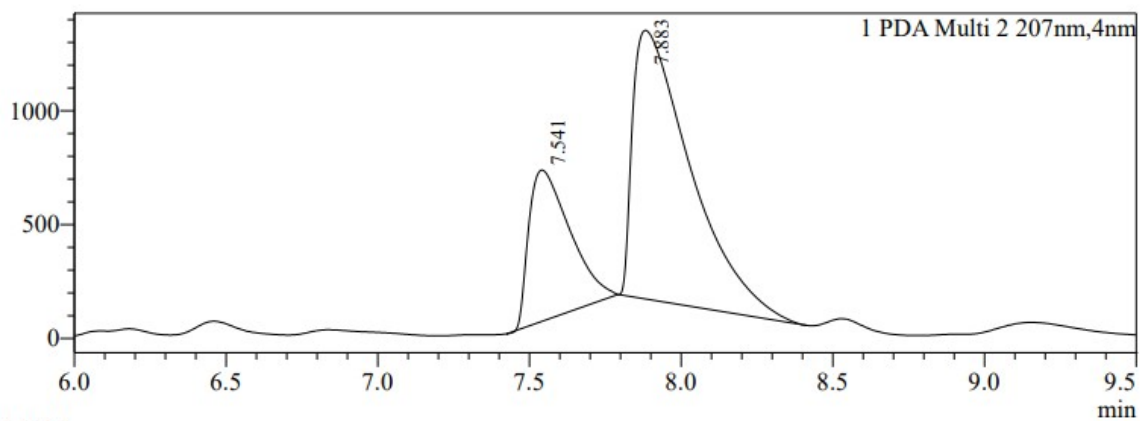

Peak Table  
PDA Ch2 207nm

| Peak# | Ret. Time | Area%   | Name |
|-------|-----------|---------|------|
| 1     | 7.541     | 28.424  |      |
| 2     | 7.883     | 71.576  |      |
| Total |           | 100.000 |      |

**Figure 76:** Chiral HPLC trace of a premade scalemic mixture of *7e* and *ent-7e*.

Chromatogram  
PC\_6\_36\_10.lcd  
mAU

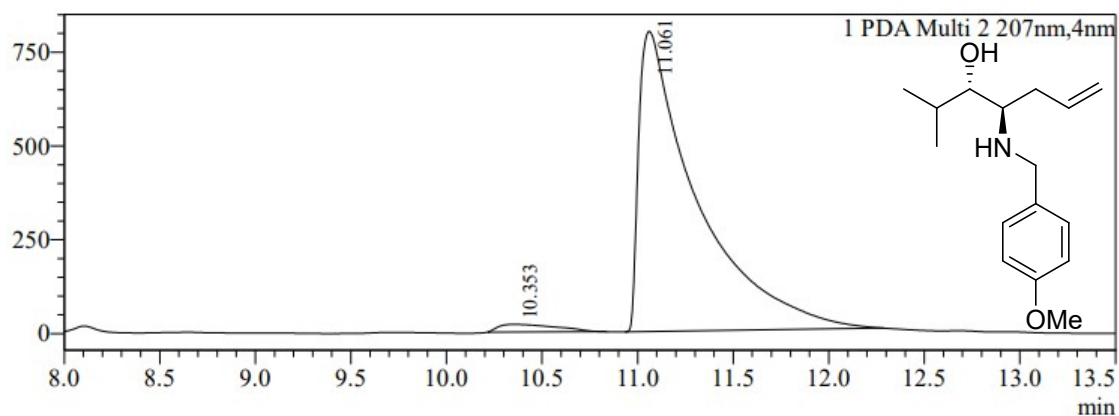

Peak Table  
PDA Ch2 207nm

| Peak# | Ret. Time | Area%   | Name |
|-------|-----------|---------|------|
| 1     | 10.353    | 2.516   |      |
| 2     | 11.061    | 97.484  |      |
| Total |           | 100.000 |      |

Figure 77: Chiral HPLC trace of *ent-7f*.

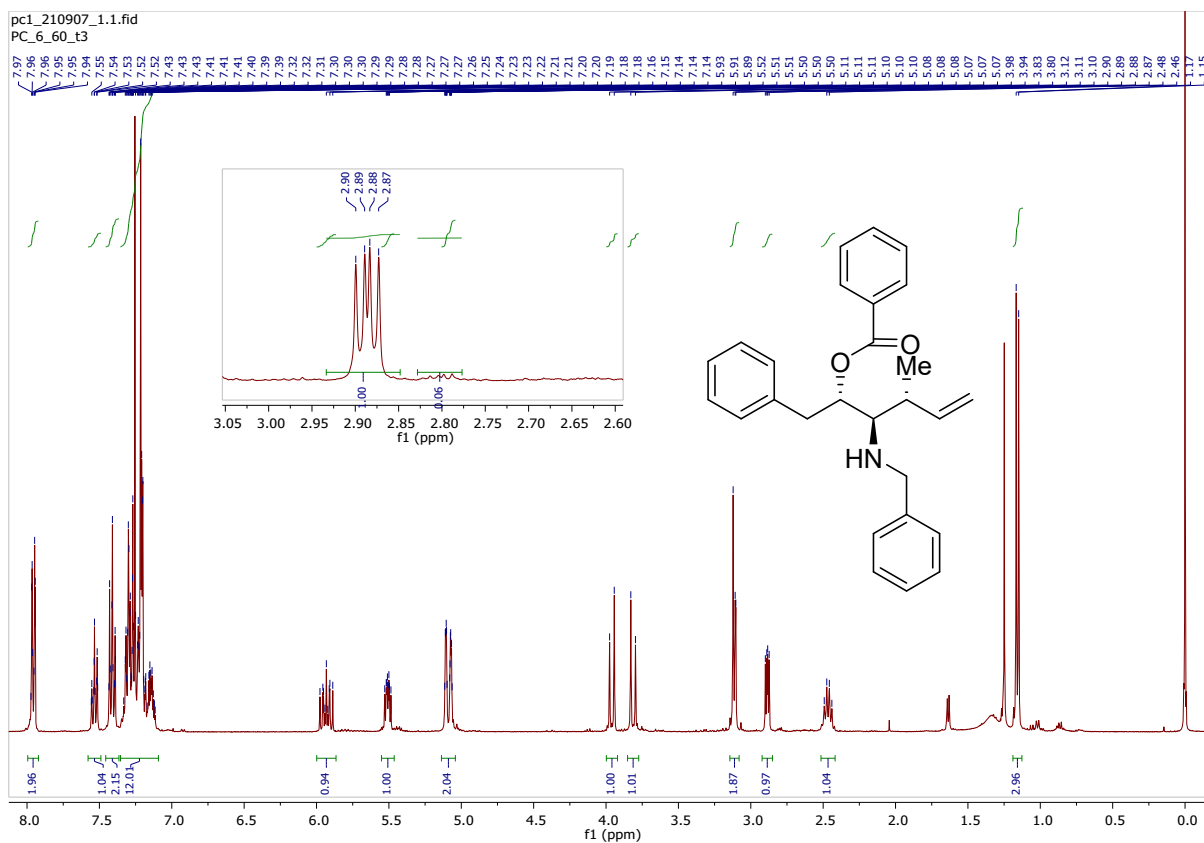

**Figure 78:**  $^1\text{H}$  NMR spectrum of **9a** (400 MHz,  $\text{CDCl}_3$ , dr [**9a**:**9b**] = 95:5. No other diastereomers were detected). Note this spectrum contains a trace of pinacol (*E*)-crotylboronate, which was inseparable from **9a**.

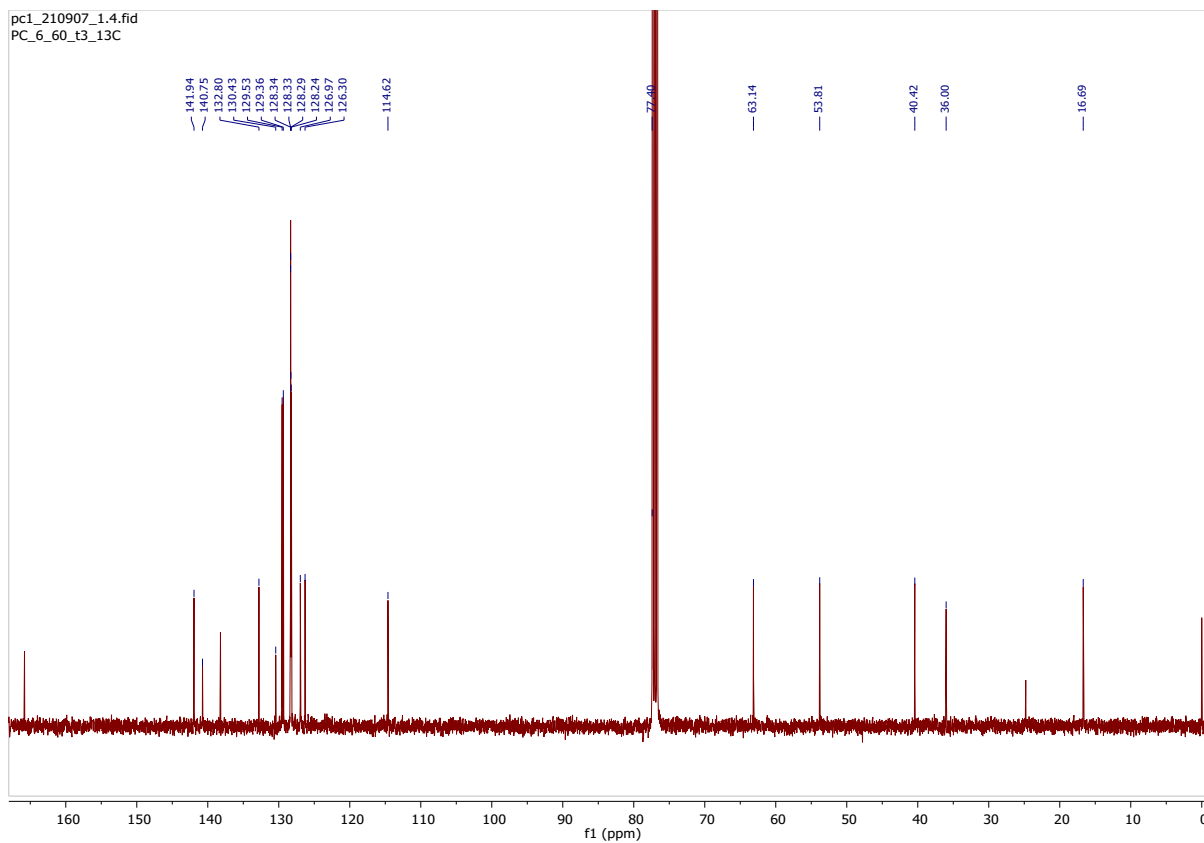

**Figure 79:**  $^{13}\text{C}$  NMR spectrum of **9a** (101 MHz,  $\text{CDCl}_3$ ).

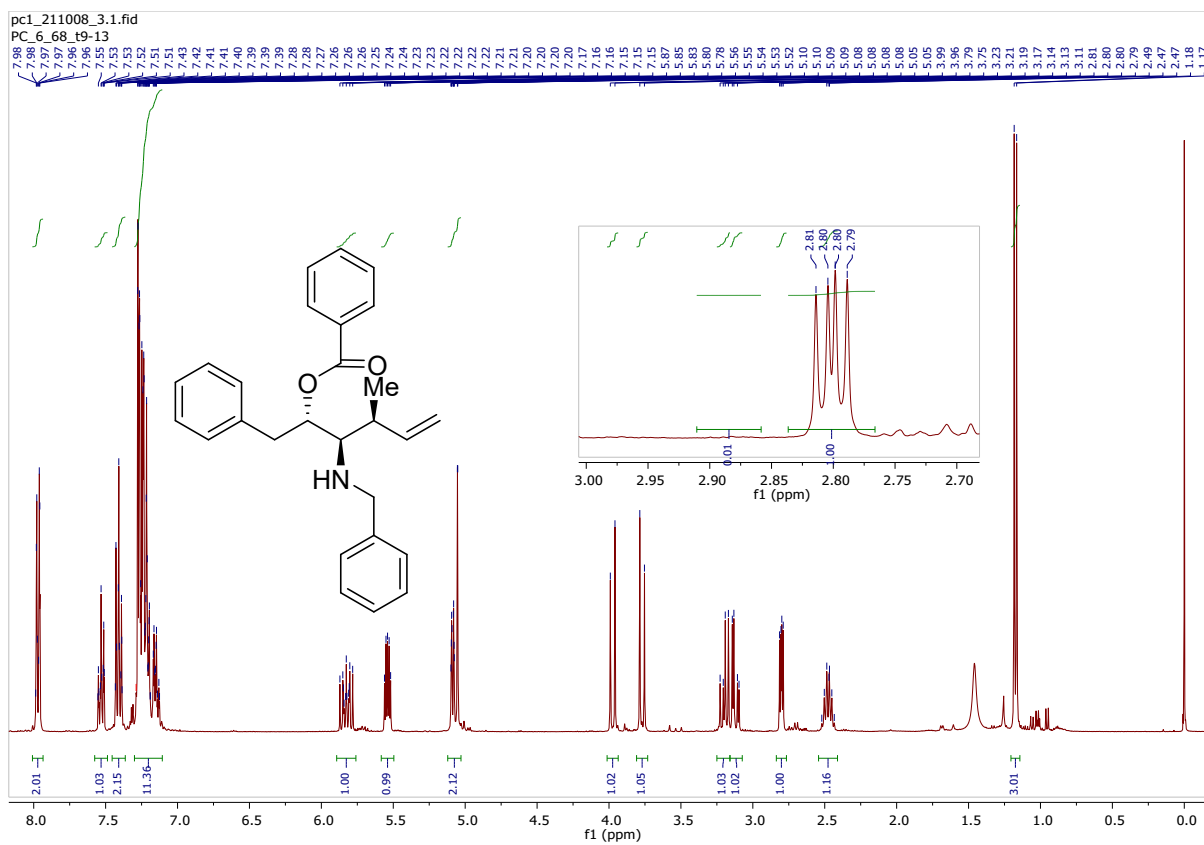

**Figure 80:**  $^1\text{H}$  NMR spectrum of **9b** (400 MHz,  $\text{CDCl}_3$ , dr [**9a:9b**] = 1:99. No other diastereomers were detected).

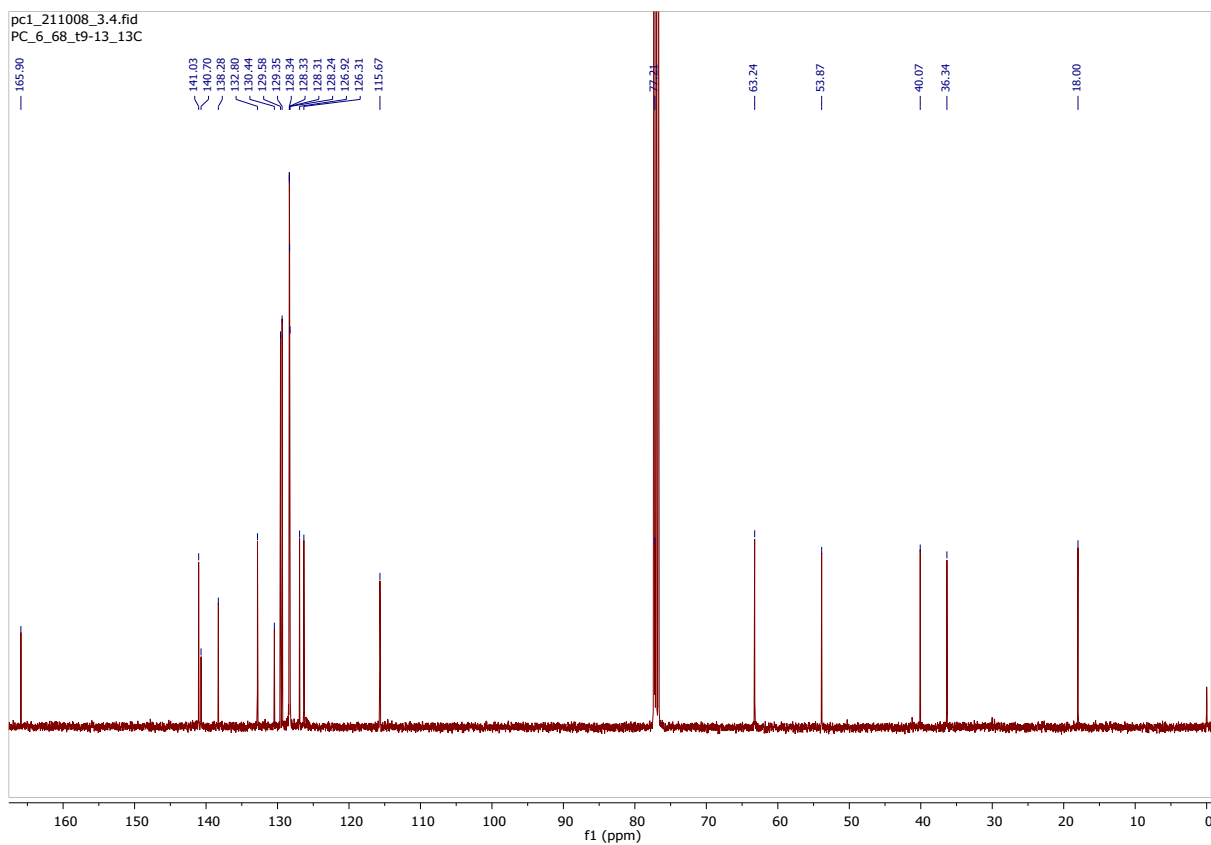

**Figure 81:**  $^{13}\text{C}$  NMR spectrum of **9b** (101 MHz,  $\text{CDCl}_3$ ).



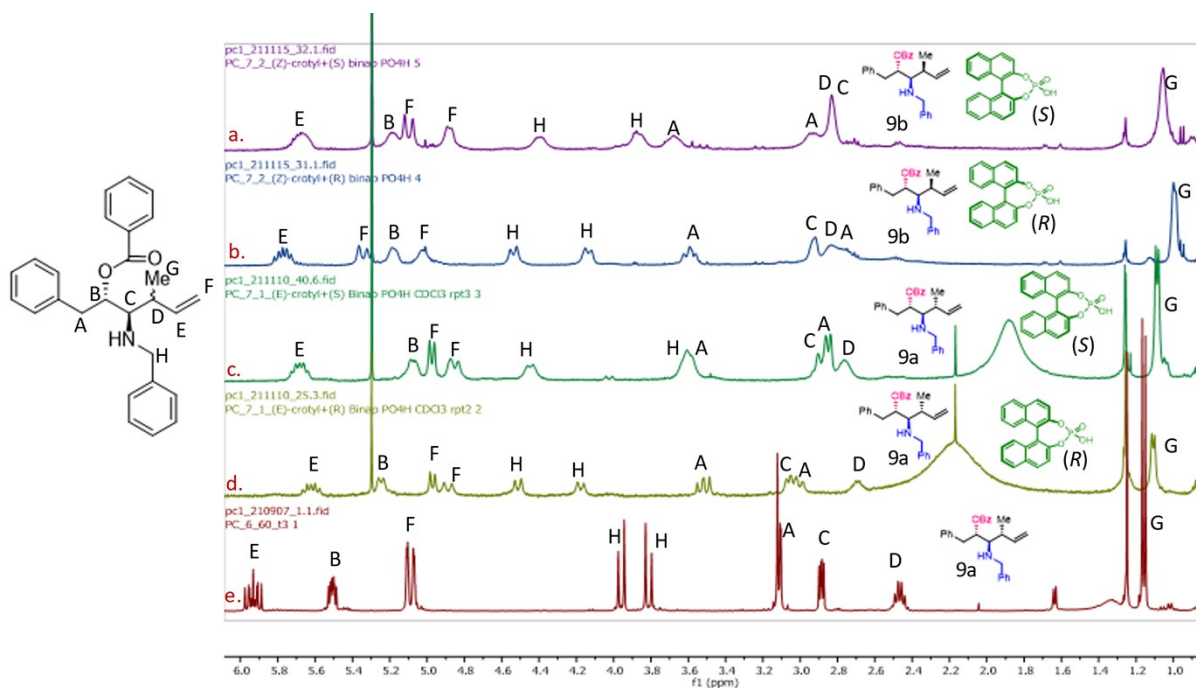

**Figure 82:** Stacked <sup>1</sup>H NMR spectra (400 MHz, CDCl<sub>3</sub>) of the derivatisation experiments (diastereomeric salt formation) using (*R*) and (*S*)-1,1'-binaphthyl-2,2'-diylphosphoric acids and **9a** (spectrum e.), with assignments, determined by analysis of respective COSY, TOCSY and HSQC 2D spectra.

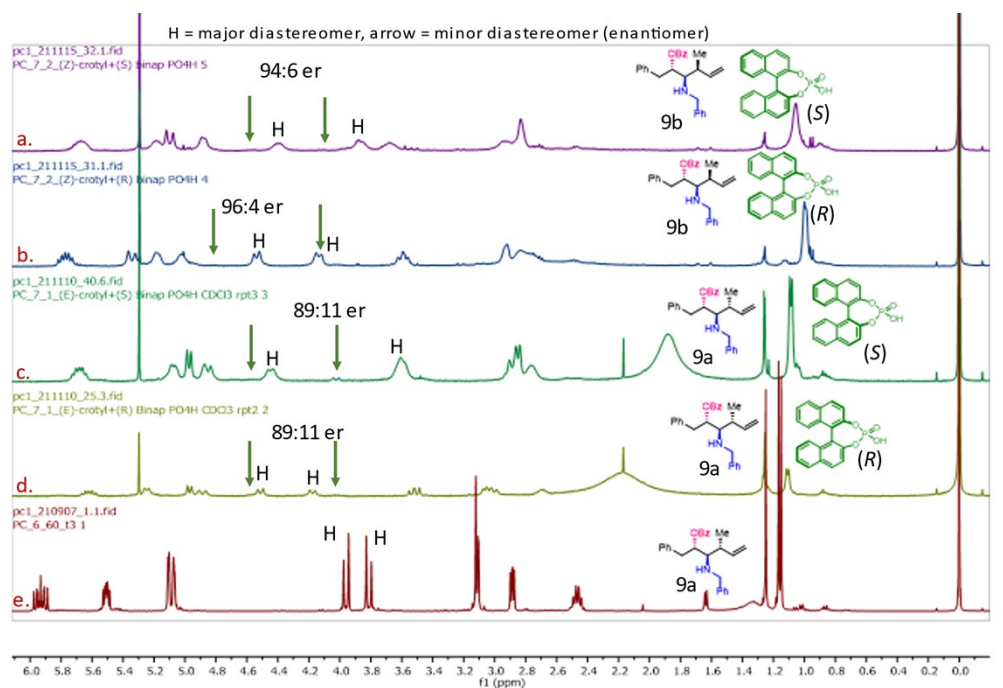

**Figure 83:** Stacked <sup>1</sup>H NMR spectra (400 MHz, CDCl<sub>3</sub>) of the derivatisation experiments, with labelling of the chemical shifts for protons H of the major and minor diastereomeric salts, therefore corresponding to enantiomers of **9a** and **9b**.

X-ray crystal structure report for **7c**

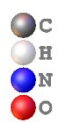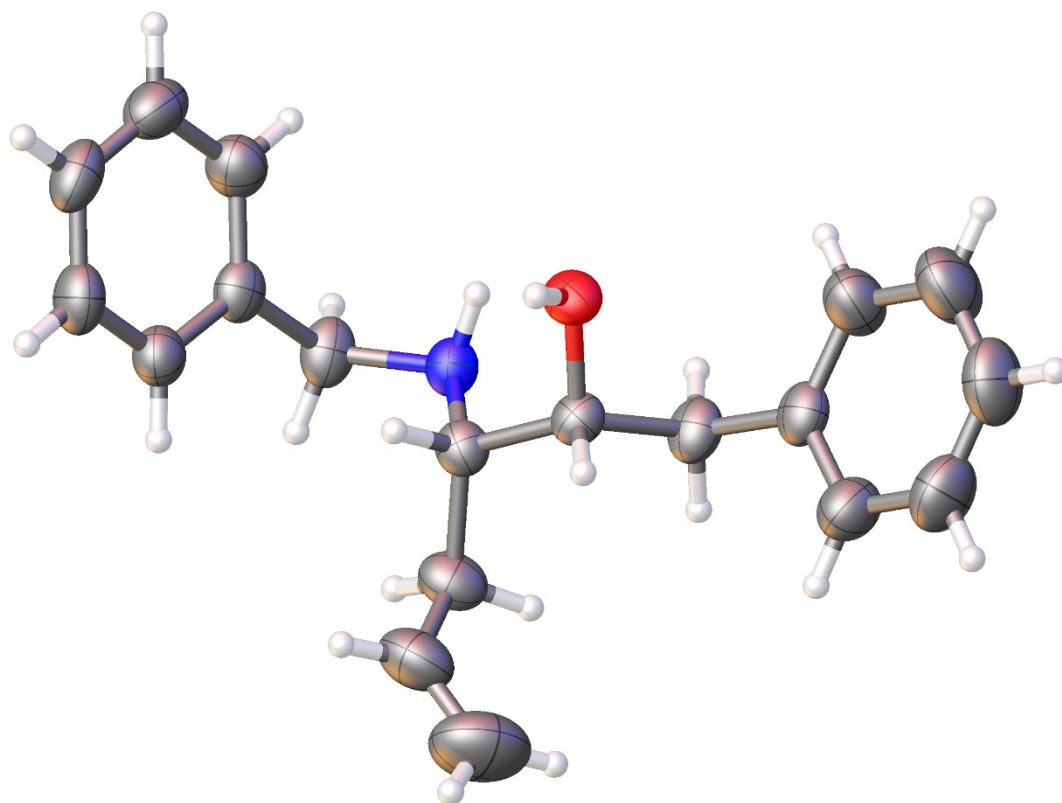

**Figure 84:** ORTEP plot of **7c**.

## exp\_198\_PC

**Table 1 Crystal data and structure refinement for exp\_198\_PC.**

|                                             |                                                               |
|---------------------------------------------|---------------------------------------------------------------|
| Identification code                         | exp_198_PC                                                    |
| Empirical formula                           | C <sub>19</sub> H <sub>23</sub> NO                            |
| Formula weight                              | 281.38                                                        |
| Temperature/K                               | 294(2)                                                        |
| Crystal system                              | orthorhombic                                                  |
| Space group                                 | P2 <sub>1</sub> 2 <sub>1</sub> 2 <sub>1</sub>                 |
| a/Å                                         | 4.89740(10)                                                   |
| b/Å                                         | 10.1935(3)                                                    |
| c/Å                                         | 32.6734(11)                                                   |
| $\alpha$ /°                                 | 90                                                            |
| $\beta$ /°                                  | 90                                                            |
| $\gamma$ /°                                 | 90                                                            |
| Volume/Å <sup>3</sup>                       | 1631.11(8)                                                    |
| Z                                           | 4                                                             |
| $\rho_{\text{calc}}$ /g/cm <sup>3</sup>     | 1.146                                                         |
| $\mu$ /mm <sup>-1</sup>                     | 0.070                                                         |
| F(000)                                      | 608.0                                                         |
| Crystal size/mm <sup>3</sup>                | 0.5 × 0.31 × 0.23                                             |
| Radiation                                   | Mo K $\alpha$ ( $\lambda$ = 0.71073)                          |
| 2 $\theta$ range for data collection/°      | 4.186 to 60.064                                               |
| Index ranges                                | -6 ≤ h ≤ 6, -14 ≤ k ≤ 14, -45 ≤ l ≤ 45                        |
| Reflections collected                       | 39780                                                         |
| Independent reflections                     | 4750 [R <sub>int</sub> = 0.0289, R <sub>sigma</sub> = 0.0212] |
| Data/restraints/parameters                  | 4750/4/215                                                    |
| Goodness-of-fit on F <sup>2</sup>           | 1.034                                                         |
| Final R indexes [I ≥ 2 $\sigma$ (I)]        | R <sub>1</sub> = 0.0387, wR <sub>2</sub> = 0.0852             |
| Final R indexes [all data]                  | R <sub>1</sub> = 0.0532, wR <sub>2</sub> = 0.0910             |
| Largest diff. peak/hole / e Å <sup>-3</sup> | 0.14/-0.11                                                    |
| Flack parameter                             | 0.1(4)                                                        |

**Table 2 Fractional Atomic Coordinates (×10<sup>4</sup>) and Equivalent Isotropic Displacement Parameters (Å<sup>2</sup>×10<sup>3</sup>) for exp\_198\_PC. U<sub>eq</sub> is defined as 1/3 of the trace of the orthogonalised U<sub>ij</sub> tensor.**

| Atom | x        | y           | z          | U(eq)    |
|------|----------|-------------|------------|----------|
| C1   | 4256 (3) | 4723.3 (16) | 3959.8 (5) | 45.9 (4) |
| O2   | 1056 (2) | 3925.4 (10) | 3475.5 (3) | 42.1 (3) |
| C2   | 2550 (3) | 3536.6 (14) | 3828.7 (4) | 35.7 (3) |
| C3   | 4166 (3) | 2291.5 (14) | 3730.1 (4) | 37.6 (3) |

|     |           |              |             |            |
|-----|-----------|--------------|-------------|------------|
| N3  | 6103 (3)  | 2566.2 (12)  | 3396.7 (4)  | 38.6 (3)   |
| C4  | 5615 (4)  | 1703.7 (19)  | 4104.1 (5)  | 52.7 (4)   |
| C5  | 3683 (7)  | 958 (4)      | 4370.6 (11) | 65.8 (10)  |
| C6  | 3160 (13) | 1240 (7)     | 4747.3 (12) | 104.4 (18) |
| C5A | 3910 (30) | 1626 (16)    | 4480 (4)    | 64 (4)     |
| C6A | 2590 (40) | 583 (16)     | 4603 (7)    | 92 (5)     |
| C1B | 7031 (3)  | 1395.1 (16)  | 3166.3 (5)  | 47.2 (4)   |
| C2B | 4849 (3)  | 687.2 (16)   | 2925.6 (5)  | 40.8 (3)   |
| C3B | 3572 (4)  | -425.0 (15)  | 3074.4 (5)  | 46.2 (4)   |
| C4B | 1568 (4)  | -1056.6 (17) | 2850.5 (6)  | 53.1 (4)   |
| C5B | 834 (4)   | -606.8 (18)  | 2473.3 (6)  | 55.7 (4)   |
| C6B | 2098 (4)  | 494 (2)      | 2315.9 (5)  | 57.8 (5)   |
| C7B | 4068 (4)  | 1136.1 (17)  | 2542.2 (5)  | 52.8 (4)   |
| C1P | 2433 (3)  | 5833.0 (16)  | 4095.3 (5)  | 44.5 (4)   |
| C2P | 1568 (5)  | 6780.8 (18)  | 3824.3 (6)  | 62.0 (5)   |
| C3P | -246 (5)  | 7749 (2)     | 3943.6 (7)  | 77.9 (7)   |
| C4P | -1237 (5) | 7778 (2)     | 4338.1 (7)  | 73.6 (6)   |
| C5P | -382 (5)  | 6849 (2)     | 4610.8 (7)  | 70.9 (6)   |
| C6P | 1434 (4)  | 5888 (2)     | 4490.4 (5)  | 59.1 (5)   |

**Table 3 Anisotropic Displacement Parameters ( $\text{\AA}^2 \times 10^3$ ) for exp\_198\_PC. The Anisotropic displacement factor exponent takes the form: -  $2\pi^2[h^2a^2U_{11}+2hka*b*U_{12}+...]$ .**

| Atom | $U_{11}$  | $U_{22}$  | $U_{33}$  | $U_{23}$  | $U_{13}$  | $U_{12}$  |
|------|-----------|-----------|-----------|-----------|-----------|-----------|
| C1   | 35.6 (8)  | 47.6 (9)  | 54.3 (9)  | -11.3 (7) | -6.0 (7)  | -3.4 (7)  |
| O2   | 34.2 (5)  | 45.7 (6)  | 46.3 (6)  | 2.4 (4)   | -9.6 (5)  | -2.2 (5)  |
| C2   | 28.5 (6)  | 41.1 (7)  | 37.5 (7)  | -2.4 (6)  | -1.3 (6)  | -2.1 (6)  |
| C3   | 29.4 (7)  | 38.4 (7)  | 44.9 (8)  | -0.2 (6)  | -1.9 (6)  | -2.1 (6)  |
| N3   | 31.7 (6)  | 39.2 (6)  | 45.1 (7)  | -3.8 (5)  | 0.2 (6)   | -0.9 (5)  |
| C4   | 45.1 (9)  | 55.6 (10) | 57.6 (10) | 11.8 (8)  | -4.6 (8)  | 5.9 (8)   |
| C5   | 66.5 (19) | 61 (2)    | 70 (2)    | 21.6 (17) | -5.3 (16) | -3.4 (18) |
| C6   | 116 (4)   | 124 (5)   | 74 (3)    | 30 (2)    | 14 (3)    | 8 (3)     |
| C5A  | 77 (7)    | 66 (8)    | 48 (7)    | 22 (6)    | -10 (6)   | -15 (7)   |
| C6A  | 93 (10)   | 101 (13)  | 81 (13)   | 10 (9)    | 20 (9)    | -20 (10)  |
| C1B  | 32.9 (8)  | 48.0 (9)  | 60.7 (10) | -13.5 (7) | 2.3 (7)   | 1.2 (7)   |
| C2B  | 32.8 (7)  | 41.1 (8)  | 48.7 (8)  | -9.0 (7)  | 3.2 (6)   | 4.0 (6)   |
| C3B  | 49.2 (9)  | 40.1 (8)  | 49.4 (8)  | -4.7 (7)  | -1.9 (8)  | 2.7 (7)   |
| C4B  | 52.2 (10) | 41.7 (9)  | 65.5 (11) | -11.3 (8) | 0.7 (9)   | -6.8 (8)  |
| C5B  | 49.7 (10) | 56.2 (10) | 61.1 (10) | -23.9 (9) | -7.5 (9)  | 3.4 (9)   |
| C6B  | 63.4 (11) | 64.1 (11) | 45.8 (9)  | -7.9 (8)  | -7.5 (8)  | 10.6 (10) |
| C7B  | 55.1 (10) | 50.7 (9)  | 52.7 (9)  | 0.7 (7)   | 4.7 (9)   | -2.8 (9)  |
| C1P  | 39.4 (8)  | 42.7 (8)  | 51.3 (9)  | -10.6 (7) | -4.5 (7)  | -5.8 (7)  |
| C2P  | 74.9 (13) | 49.2 (10) | 62.0 (11) | 3.7 (8)   | 9.0 (10)  | 5.2 (10)  |

|     |           |           |           |            |           |           |
|-----|-----------|-----------|-----------|------------|-----------|-----------|
| C3P | 95.4 (17) | 50.2 (11) | 88.2 (15) | 5.8 (10)   | 5.4 (14)  | 15.5 (12) |
| C4P | 69.2 (13) | 54.3 (11) | 97.5 (16) | -17.0 (11) | 8.7 (13)  | 12.0 (11) |
| C5P | 75.6 (15) | 75.1 (14) | 62.1 (12) | -20.3 (11) | 10.1 (11) | 5.1 (12)  |
| C6P | 65.7 (12) | 61.6 (11) | 49.9 (9)  | -7.4 (8)   | -3.9 (9)  | 8.0 (10)  |

**Table 4 Bond Lengths for exp\_198\_PC.**

| Atom | Atom | Length/Å    | Atom | Atom | Length/Å  |
|------|------|-------------|------|------|-----------|
| C1   | C2   | 1.531 (2)   | C2B  | C3B  | 1.383 (2) |
| C1   | C1P  | 1.508 (2)   | C2B  | C7B  | 1.387 (2) |
| O2   | C2   | 1.4229 (17) | C3B  | C4B  | 1.383 (2) |
| C2   | C3   | 1.530 (2)   | C4B  | C5B  | 1.363 (3) |
| C3   | N3   | 1.4711 (19) | C5B  | C6B  | 1.381 (3) |
| C3   | C4   | 1.535 (2)   | C6B  | C7B  | 1.381 (3) |
| N3   | C1B  | 1.4827 (19) | C1P  | C2P  | 1.377 (3) |
| C4   | C5   | 1.493 (4)   | C1P  | C6P  | 1.382 (2) |
| C4   | C5A  | 1.487 (10)  | C2P  | C3P  | 1.383 (3) |
| C5   | C6   | 1.290 (6)   | C3P  | C4P  | 1.378 (3) |
| C5A  | C6A  | 1.307 (12)  | C4P  | C5P  | 1.366 (3) |
| C1B  | C2B  | 1.510 (2)   | C5P  | C6P  | 1.381 (3) |

**Table 5 Bond Angles for exp\_198\_PC.**

| Atom | Atom | Atom | Angle/°     | Atom | Atom | Atom | Angle/°     |
|------|------|------|-------------|------|------|------|-------------|
| C1P  | C1   | C2   | 110.59 (12) | C7B  | C2B  | C1B  | 120.50 (15) |
| O2   | C2   | C1   | 106.70 (12) | C2B  | C3B  | C4B  | 121.10 (16) |
| O2   | C2   | C3   | 109.03 (11) | C5B  | C4B  | C3B  | 120.58 (17) |
| C3   | C2   | C1   | 115.59 (12) | C4B  | C5B  | C6B  | 119.45 (17) |
| C2   | C3   | C4   | 113.28 (13) | C7B  | C6B  | C5B  | 119.93 (17) |
| N3   | C3   | C2   | 109.36 (11) | C6B  | C7B  | C2B  | 121.32 (17) |
| N3   | C3   | C4   | 111.46 (13) | C2P  | C1P  | C1   | 121.33 (16) |
| C3   | N3   | C1B  | 114.85 (12) | C2P  | C1P  | C6P  | 117.60 (16) |
| C5   | C4   | C3   | 111.72 (18) | C6P  | C1P  | C1   | 120.95 (17) |
| C5A  | C4   | C3   | 114.7 (5)   | C1P  | C2P  | C3P  | 121.12 (19) |
| C6   | C5   | C4   | 124.7 (6)   | C4P  | C3P  | C2P  | 120.3 (2)   |
| C6A  | C5A  | C4   | 125.2 (19)  | C5P  | C4P  | C3P  | 119.2 (2)   |
| N3   | C1B  | C2B  | 115.61 (13) | C4P  | C5P  | C6P  | 120.2 (2)   |
| C3B  | C2B  | C1B  | 121.90 (15) | C5P  | C6P  | C1P  | 121.52 (19) |
| C3B  | C2B  | C7B  | 117.60 (15) |      |      |      |             |

**Table 6 Hydrogen Bonds for exp\_198\_PC.**

| D | H | A | d(D-H)/Å | d(H-A)/Å | d(D-A)/Å | D-H-A/° |
|---|---|---|----------|----------|----------|---------|
|---|---|---|----------|----------|----------|---------|

O2H2N3<sup>1</sup>      0.82      1.99 2.8055 (16)      175.1

<sup>1</sup>-1+X,+Y,+Z

**Table 7 Torsion Angles for exp\_198\_PC.**

| A  | B   | C   | D   | Angle/ <sup>o</sup> | A   | B   | C   | D   | Angle/ <sup>o</sup> |
|----|-----|-----|-----|---------------------|-----|-----|-----|-----|---------------------|
| C1 | C2  | C3  | N3  | -59.00 (17)         | C4  | C3  | N3  | C1B | 75.91 (17)          |
| C1 | C2  | C3  | C4  | 65.99 (17)          | C1B | C2B | C3B | C4B | 179.67 (14)         |
| C1 | C1P | C2P | C3P | 175.77 (18)         | C1B | C2B | C7B | C6B | 179.33 (15)         |
| C1 | C1P | C6P | C5P | 175.60 (17)         | C2B | C3B | C4B | C5B | 1.1 (3)             |
| O2 | C2  | C3  | N3  | 61.16 (14)          | C3B | C2B | C7B | C6B | -0.3 (2)            |
| O2 | C2  | C3  | C4  | 173.86 (12)         | C3B | C4B | C5B | C6B | -0.4 (3)            |
| C2 | C1  | C1P | C2P | -91.7 (2)           | C4B | C5B | C6B | C7B | -0.6 (3)            |
| C2 | C1  | C1P | C6P | 84.22 (19)          | C5B | C6B | C7B | C2B | 1.0 (3)             |
| C2 | C3  | N3  | C1B | 158.05 (12)         | C7B | C2B | C3B | C4B | -0.7 (2)            |
| C2 | C3  | C4  | C5  | 78.2 (3)            | C1P | C1  | C2  | O2  | 65.18 (17)          |
| C2 | C3  | C4  | C5A | 45.5 (7)            | C1P | C1  | C2  | C3  | 173.41 (13)         |
| C3 | N3  | C1B | C2B | 65.21 (18)          | C1P | C2P | C3P | C4P | -0.3 (3)            |
| C3 | C4  | C5  | C6  | -119.0 (4)          | C2P | C1P | C6P | C5P | 0.5 (3)             |
| C3 | C4  | C5A | C6A | 97.3 (15)           | C2P | C3P | C4P | C5P | 0.7 (4)             |
| N3 | C3  | C4  | C5  | -158.0 (2)          | C3P | C4P | C5P | C6P | -0.6 (4)            |
| N3 | C3  | C4  | C5A | 169.3 (7)           | C4P | C5P | C6P | C1P | 0.0 (3)             |
| N3 | C1B | C2B | C3B | -98.61 (18)         | C6P | C1P | C2P | C3P | -0.3 (3)            |
| N3 | C1B | C2B | C7B | 81.78 (19)          |     |     |     |     |                     |

**Table 8 Hydrogen Atom Coordinates ( $\text{\AA} \times 10^4$ ) and Isotropic Displacement Parameters ( $\text{\AA}^2 \times 10^3$ ) for exp\_198\_PC.**

| Atom | x         | y         | z        | U(eq)  |
|------|-----------|-----------|----------|--------|
| H1A  | 5456.27   | 4474.64   | 4182.88  | 55     |
| H1B  | 5380.61   | 5010.87   | 3732.45  | 55     |
| H2   | -396.98   | 3526.59   | 3467.69  | 63     |
| H2A  | 1248.89   | 3335.03   | 4047.73  | 43     |
| H3   | 2866.29   | 1635.45   | 3629.58  | 45     |
| H3A  | 5250 (40) | 3087 (16) | 3219 (5) | 42 (5) |
| H4A  | 7057.77   | 1121.7    | 4012.56  | 63     |
| H4B  | 6445.86   | 2403.74   | 4261.93  | 63     |
| H4BC | 6234.59   | 827.5     | 4034.98  | 63     |
| H4BD | 7217.45   | 2228.88   | 4163.85  | 63     |
| H5   | 2794.08   | 239.7     | 4256.63  | 79     |

|      |          |          |         |     |
|------|----------|----------|---------|-----|
| H6A  | 4011.3   | 1951.53  | 4871.32 | 125 |
| H6B  | 1930.09  | 730.24   | 4895.03 | 125 |
| H5A  | 3762.76  | 2378.13  | 4639.09 | 76  |
| H6AA | 2680.31  | -188.78  | 4452.04 | 110 |
| H6AB | 1559.82  | 613.16   | 4842.24 | 110 |
| H1BA | 7832.9   | 780.71   | 3358.55 | 57  |
| H1BB | 8458.98  | 1663.44  | 2978.46 | 57  |
| H3B  | 4069.65  | -753.61  | 3329.21 | 55  |
| H4BA | 714.38   | -1794.72 | 2958.25 | 64  |
| H5B  | -507.12  | -1037.85 | 2323.17 | 67  |
| H6BA | 1622.07  | 802.82   | 2057.68 | 69  |
| H7B  | 4888.71  | 1884.44  | 2435.48 | 63  |
| H2P  | 2213.26  | 6770     | 3556.67 | 74  |
| H3P  | -799.05  | 8382.7   | 3756.44 | 93  |
| H4P  | -2471.94 | 8421.92  | 4417.72 | 88  |
| H5P  | -1025.26 | 6864.18  | 4878.51 | 85  |
| H6P  | 1998.15  | 5262.23  | 4679.64 | 71  |

**Table 9 Atomic Occupancy for exp\_198\_PC.**

| Atom | Occupancy | Atom | Occupancy | Atom | Occupancy |
|------|-----------|------|-----------|------|-----------|
| H4A  | 0.796 (9) | H4B  | 0.796 (9) | H4BC | 0.204 (9) |
| H4BD | 0.204 (9) | C5   | 0.796 (9) | H5   | 0.796 (9) |
| C6   | 0.796 (9) | H6A  | 0.796 (9) | H6B  | 0.796 (9) |
| C5A  | 0.204 (9) | H5A  | 0.204 (9) | C6A  | 0.204 (9) |
| H6AA | 0.204 (9) | H6AB | 0.204 (9) |      |           |

#### Experimental

Single crystals of C<sub>19</sub>H<sub>23</sub>NO [exp\_198\_PC] were [1]. A suitable crystal was selected and [Mitegen mount + Paratone] on a XtaLAB Mini II diffractometer. The crystal was kept at 294(2) K during data collection. Using Olex2 [1], the structure was solved with the ShelXT [2] structure solution program using Intrinsic Phasing and refined with the ShelXL [3] refinement package using Least Squares minimisation.

1. Dolomanov, O.V., Bourhis, L.J., Gildea, R.J., Howard, J.A.K. & Puschmann, H. (2009), *J. Appl. Cryst.* 42, 339-341.
2. Sheldrick, G.M. (2015). *Acta Cryst.* A71, 3-8.
3. Sheldrick, G.M. (2015). *Acta Cryst.* C71, 3-8.

#### Crystal structure determination of [exp\_198\_PC]

**Crystal Data** for C<sub>19</sub>H<sub>23</sub>NO (*M* = 281.38 g/mol): orthorhombic, space group P2<sub>1</sub>2<sub>1</sub>2<sub>1</sub> (no. 19), *a* = 4.89740(10) Å, *b* = 10.1935(3) Å, *c* = 32.6734(11) Å, *V* = 1631.11(8) Å<sup>3</sup>, *Z* = 4, *T* = 294(2) K,  $\mu(\text{Mo K}\alpha) = 0.070 \text{ mm}^{-1}$ , *D*<sub>calc</sub> = 1.146 g/cm<sup>3</sup>, 39780 reflections measured (4.186° ≤ 2 $\theta$  ≤ 60.064°), 4750 unique (*R*<sub>int</sub> = 0.0289, *R*<sub>sigma</sub> = 0.0212) which were used in all calculations. The final *R*<sub>1</sub> was 0.0387 (*I* > 2 $\sigma$ (*I*)) and *wR*<sub>2</sub> was 0.0910 (all data).

#### Refinement model description

Number of restraints - 4, number of constraints - unknown.

Details:

1. Fixed Uiso

At 1.2 times of:

All C(H) groups, All C(H,H) groups, All C(H,H,H,H) groups

At 1.5 times of:  
All O(H) groups

2. Restrained distances  
C5-C4  
1.46 with sigma of 0.01  
C5A-C4  
1.46 with sigma of 0.01  
C6A-C5A = C6-C5  
1.33 with sigma of 0.01

3. Others  
Sof(H4BC)=Sof(H4BD)=Sof(C5A)=Sof(H5A)=Sof(C6A)=Sof(H6AA)=Sof(H6AB)=1-FVAR(1)  
Sof(H4A)=Sof(H4B)=Sof(C5)=Sof(H5)=Sof(C6)=Sof(H6A)=Sof(H6B)=FVAR(1)

4.a Ternary CH refined with riding coordinates:  
C2(H2A), C3(H3)

4.b Secondary CH2 refined with riding coordinates:  
C1(H1A,H1B), C4(H4A,H4B), C4(H4BC,H4BD), C1B(H1BA,H1BB)

4.c Aromatic/amide H refined with riding coordinates:  
C5(H5), C5A(H5A), C3B(H3B), C4B(H4BA), C5B(H5B), C6B(H6BA), C7B(H7B),  
C2P(H2P), C3P(H3P), C4P(H4P), C5P(H5P), C6P(H6P)

4.d X-CH2 refined with riding coordinates:  
C6(H6A,H6B), C6A(H6AA,H6AB)

4.e Idealised tetrahedral OH refined as rotating group:  
O2(H2)

This report has been created with Olex2, compiled on 2019.04.23 svn.r3594 for Rigaku Oxford Diffraction. Please [let us know](#) if there are any errors or if you would like to have additional features.



## References

1. Perrin, D. D.; Armarego, W. L. F., *Purification of Laboratory Chemicals*. 3rd ed.; Pergamon Press: Oxford, 1988.
2. Wang, A.; Jiang, H., Palladium-Catalyzed Direct Oxidation of Alkenes with Molecular Oxygen: General and Practical Methods for the Preparation of 1,2-Diols, Aldehydes, and Ketones. *J. Org. Chem.* **2010**, *75*, 2321.
3. Thaima, T.; Pyne, S. G., Regioselective and diastereoselective borono-Mannich reactions with pinacol allenylboronate. *Org. Lett.* **2015**, *17*, 778-781.
4. Zhong, G., A Facile and Rapid Route to Highly Enantiopure 1,2-Diols by Novel Catalytic Asymmetric  $\alpha$ -Aminooxylation of Aldehydes. *Angew. Chem. Int. Ed.* **2003**, *42*, 4247-4250.
5. Brown, S. P.; Brochu, M. P.; Sinz, C. J.; MacMillan, D. W. C., The Direct and Enantioselective Organocatalytic  $\alpha$ -Oxidation of Aldehydes. *J. Am. Chem. Soc.* **2003**, *125*, 10808-10809.
6. Hayashi, Y.; Umekubo, N.; Hiramata, T., Prolinate Salts as Catalysts for  $\alpha$ -Aminooxylation of Aldehyde and Associated Mechanistic Insights. *Org. Lett.* **2017**, *19*, 4155-4158.
7. Staples, R. J. *Growing and Mounting Crystals Your Instrument Will Treasure*; Michigan State University 2017.
8. Vaismaa, M. J. P.; Yau, S. C.; Tomkinson, N. C. O., Organocatalytic alpha-oxybenzoylation of aldehydes. *Tetrahedron Lett.* **2009**, *50*, 3625-3627.
9. Kano, T.; Mii, H.; Maruoka, K., Direct Asymmetric Benzoyloxylation of Aldehydes Catalyzed by 2-Tritylpyrrolidine. *J. Am. Chem. Soc.* **2009**, *131*, 3450-3451.
10. Shapiro, M. J.; Archinal, A. E.; Jarema, M. A., Chiral purity determination by proton NMR spectroscopy. Novel use of 1,1'-binaphthyl-2,2'-diylphosphoric acid. *J. Org. Chem.* **1989**, *54*, 5826-5828.
